# Supplementary material for: Disparities of infant and neonatal mortality trends in Greece during the years of economic crisis by ethnicity, place of residence and human development index: a nationwide population study
Source: PubMed Central journal article supplement — BMJ Open. 2019 Aug 18;9(8):e025287. doi: 10.1136/bmjopen-2018-025287 (PMC6701607; doi:10.1136/bmjopen-2018-025287), 2019-08-18
Supplement: bmjopen-2018-025287.draft_revisions.pdf [file bmjopen-2018-025287.draft_revisions.pdf]

# BMJ Open

BMJ Open is committed to open peer review. As part of this commitment we make the peer review history of every article we publish publicly available.

When an article is published we post the peer reviewers' comments and the authors' responses online. We also post the versions of the paper that were used during peer review. These are the versions that the peer review comments apply to.

The versions of the paper that follow are the versions that were submitted during the peer review process. They are not the versions of record or the final published versions. They should not be cited or distributed as the published version of this manuscript.

BMJ Open is an open access journal and the full, final, typeset and author-corrected version of record of the manuscript is available on our site with no access controls, subscription charges or pay-per-view fees (<http://bmjopen.bmj.com>).

If you have any questions on BMJ Open's open peer review process please email [info.bmjopen@bmj.com](mailto:info.bmjopen@bmj.com)

# BMJ Open

## Disparities by ethnicity, place of residence and human development index of infant and neonatal mortality trends in Greece during the years of economic crisis: a nationwide population study

|                               |                                                                                                                                                                                                                                                                                                                                                                                                                                                                                                                                                                                                                                                                                                                                                                                                                                                                                                                               |
|-------------------------------|-------------------------------------------------------------------------------------------------------------------------------------------------------------------------------------------------------------------------------------------------------------------------------------------------------------------------------------------------------------------------------------------------------------------------------------------------------------------------------------------------------------------------------------------------------------------------------------------------------------------------------------------------------------------------------------------------------------------------------------------------------------------------------------------------------------------------------------------------------------------------------------------------------------------------------|
| Journal:                      | <i>BMJ Open</i>                                                                                                                                                                                                                                                                                                                                                                                                                                                                                                                                                                                                                                                                                                                                                                                                                                                                                                               |
| Manuscript ID                 | bmjopen-2018-025287                                                                                                                                                                                                                                                                                                                                                                                                                                                                                                                                                                                                                                                                                                                                                                                                                                                                                                           |
| Article Type:                 | Research                                                                                                                                                                                                                                                                                                                                                                                                                                                                                                                                                                                                                                                                                                                                                                                                                                                                                                                      |
| Date Submitted by the Author: | 07-Jul-2018                                                                                                                                                                                                                                                                                                                                                                                                                                                                                                                                                                                                                                                                                                                                                                                                                                                                                                                   |
| Complete List of Authors:     | Sihanidou, Tania; National & Kapodistrian University of Athens, Medical School, Dessypris, Nick; Athens University Medical School, Dept. of Hygiene, Epidemiology and Medical Statistics<br>Analitis, Antonis; Department of Hygiene, Epidemiology and Medical Statistics, School of Medicine, National & Kapodistrian University of Athens<br>Mihos, Constantinos; Department of Hygiene, Epidemiology and Medical Statistics, School of Medicine, National and Kapodistrian University of Athens<br>Evangelou, Evangelos; Dept of Hygiene and Epidemiology; Department of Epidemiology and Biostatistics, Imperial College<br>Chrousos, George; First Department of Pediatrics, National and Kapodistrian University of Athens, School of Medicine<br>PETRIDOU, ELENI; University of Athens Medical School, Dept. of Hygiene, Epidemiology and Medical Statistics; Clinical Epidemiology Unit, Karolinska Institute, 171 77 |
| Keywords:                     | PAEDIATRICS, Community child health < PAEDIATRICS, NEONATOLOGY, Neonatal intensive & critical care < INTENSIVE & CRITICAL CARE, EPIDEMIOLOGY, PUBLIC HEALTH                                                                                                                                                                                                                                                                                                                                                                                                                                                                                                                                                                                                                                                                                                                                                                   |
|                               |                                                                                                                                                                                                                                                                                                                                                                                                                                                                                                                                                                                                                                                                                                                                                                                                                                                                                                                               |

SCHOLARONE™  
Manuscripts

1  
2 **Disparities by ethnicity, place of residence and human development index of infant and**  
3  
4 **neonatal mortality trends in Greece during the years of economic crisis: a nationwide**  
5  
6 **population study**  
7  
8  
9  
10

11 Tania Siahaidou, Nick Dessypris, Antonis Analitis, Constantinos Mihas, Evangelos Evangelou,  
12  
13 George Chrousos, Eleni Th Petridou  
14  
15

16  
17  
18 First Department of Pediatrics, School of Medicine, National and Kapodistrian University of  
19  
20 Athens, 11527 Athens, Greece  
21  
22

23 Tania Siahaidou  
24

25 Associate Professor in Pediatrics-Neonatology  
26  
27

28 Department of Hygiene, Epidemiology and Medical Statistics, School of Medicine, National  
29  
30 and Kapodistrian University of Athens, 11527 Athens, Greece  
31  
32

33 Nick Dessypris  
34

35 Research Associate  
36  
37

38 Department of Hygiene, Epidemiology and Medical Statistics, School of Medicine, National  
39  
40 and Kapodistrian University of Athens, 11527 Athens, Greece  
41  
42

43 Antonis Analitis  
44

45 Research Associate  
46  
47

48 Department of Hygiene, Epidemiology and Medical Statistics, School of Medicine, National  
49  
50 and Kapodistrian University of Athens, 11527 Athens, Greece  
51  
52

53 Constantinos Mihas  
54

55 MD General Medicine, Research Associate  
56  
57  
58  
59  
60

1  
2 Department of Hygiene and Epidemiology, University of Ioannina Medical School, Ioannina,  
3  
4 Greece and Department of Epidemiology and Biostatistics, Imperial College London, London,  
5  
6 UK  
7

8  
9 Evangelos Evangelou

10  
11 Assistant Professor of Clinical and Molecular Epidemiology  
12

13  
14 First Department of Pediatrics, School of Medicine, National and Kapodistrian University of  
15  
16 Athens, 11527 Athens, Greece  
17

18  
19 George Chrousos

20  
21 Professor of Pediatrics  
22

23  
24 Department of Hygiene, Epidemiology and Medical Statistics, School of Medicine, National  
25  
26 and Kapodistrian University of Athens, Athens 11527, Greece & Clinical Epidemiology Unit,  
27  
28 Karolinska Institute, 171 77, Stockholm, Sweden  
29

30  
31 Eleni Th Petridou

32  
33 Professor of Preventive Medicine & Epidemiology  
34  
35

36  
37  
38  
39 **Correspondence to:** Tania Siahnidou; [siahan@med.uoa.gr](mailto:siahan@med.uoa.gr)  
40  
41  
42  
43  
44  
45  
46  
47  
48  
49  
50  
51  
52  
53  
54  
55  
56  
57  
58  
59  
60

**ABSTRACT****OBJECTIVE**

To explore the role of sociodemographic factors on infant (IMR) and neonatal mortality rate trends in Greece during the period 2004-2016, which includes the years of the economic crisis in the country.

**DESIGN**

Nationwide individual data for livebirths and infant (0-11 months) deaths provided by the Hellenic Statistical Authority (ELSTAT) were examined using Poisson regression, joinpoint regression and Interrupted Time Series (ITS) statistical analyses.

**SETTING**

Greece

**PARTICIPANTS**

All infant deaths (n=4862) over the 13-year period, of which 87.2% were born to Greek mothers, and respective livebirths.

**MAIN OUTCOME MEASURES**

Evolution of IMR (0-364 days), early (<7 days, ENMR)/late (7-27 days, LNMR) neonatal and post neonatal (28-364 days, PNMR) mortality trends, by maternal nationality, place of residence and Human Development Index (HDI).

**RESULTS**

Overall, during the study-period among infants of Greek mothers, IMR -particularly PNMR- declined significantly (-0.9%, -1.6% annually, respectively), albeit differentially by place of residence (max=IMR<sub>urban</sub>:-4.1%, max=ENMR<sub>rural</sub>:+24.1%). By contrast, among infants of non-Greek mothers, the low starting IMR/ENMR/LNMR/PNMR increased significantly (max ENMR:+12.5%) leading to an erroneously, non-statistically significant, positive time-trend pattern overall in Greece. The inverse associations of HDI with IMR, ENMR and PNMR were

1  
2 restricted to Greek mothers' infants. Of note, joinpoint regression analyses among Greek  
3  
4 infants indicated sizeable, borderline significant increases of IMR following the crisis (+9.3%,  
5  
6 2012-2016,  $p=0.07$ ), mainly ENMR (+10.2%, 2011-2016,  $p=0.06$ ). By contrast, the high  
7  
8 (+17.1%) IMR increases among non-Greek infants were restricted to 2004-2011 and  
9  
10 equalized to those of Greek mothers' infants thereafter. ITS analyses in preset years (2008,  
11  
12 2010, 2012) overall confirmed the joinpoint results and identified adverse trends in LNMR  
13  
14 and PNMR after 2012 among Greek infants.  
15  
16

## 17 18 **CONCLUSIONS**

19  
20 HDI and rural residence were significant predictors of infant health. The strongly decreasing  
21  
22 IMR -especially ENMR- trends among Greeks were stagnated after a lag time of ~four years  
23  
24 of crisis approximating the previously sharply increasing trends among non-Greek infants.  
25  
26  
27  
28  
29  
30  
31  
32

### 33 **Strengths of this study**

- 34  
35 • Longest follow-up period of national data, as contrasted to previously Greek-based  
36  
37 studies.
- 38  
39 • Moreover, maternal ethnicity is for first time considered in the analyses explaining  
40  
41 part, if not most, of the heterogeneity of trends through the study period.
- 42  
43 • Three complimentary statistical methodologies were used to describe the overall  
44  
45 evolution of infant mortality and its components.  
46  
47

### 48 **Limitations**

- 49  
50 • Absence of a linkage system between birth and death data.
- 51  
52 • Data on the role of biological factors or specific causes of infant death are missing.  
53  
54  
55  
56  
57  
58  
59  
60

1  
2  
3  
4  
5  
6  
7  
8  
9  
10  
11  
12  
13  
14  
15  
16  
17  
18  
19  
20  
21  
22  
23  
24  
25  
26  
27  
28  
29  
30  
31  
32  
33  
34  
35  
36  
37  
38  
39  
40  
41  
42  
43  
44  
45  
46  
47  
48  
49  
50  
51  
52  
53  
54  
55  
56  
57  
58  
59  
60

**Abbreviations:**

IM; infant mortality

IMR; infant mortality rates

ENMR; early neonatal mortality rates

LNMR; late neonatal mortality rates

PNMR; post neonatal mortality rates

HDI; Human Development Index

ELSTAT; Hellenic Statistical Authority

ITS; Interrupted Time Series

## Introduction

Socioeconomic factors have repeatedly been recognized as strong determinants of the health status of the population, including infants.<sup>1-3</sup> Economic indicators, such as the *per capita* Gross National Product, were suggested to be at least as important contributors of infant mortality (IM) as narrowly defined factors relating to provision of medical care, e.g. the relative number of doctors or hospital beds in a community.<sup>1</sup> Not surprisingly, the recent economic crisis of ~2008, has been linked with declines in population and child health reflected also by increased IM rates (IMR).<sup>4,5</sup> It is worth noting that in European Union countries, even a minor 1% cut in government healthcare spending was associated with significant increases in all mortality metrics, including neonatal and post neonatal IM.<sup>6</sup>

On the contrary, associations between the crisis and increased mortality have been questioned in other studies showing that most indicators of population health, apart from those relevant to suicides and mental health, continued improving after crisis initiation.<sup>7-10</sup> Moreover, the economic crisis has been associated with some beneficial effects, i.e. decline in rates of road traffic accidents, and smoking cessation.<sup>4,9</sup> Reasonably, the impact of the crisis on health depends on several factors including the duration and intensity of the recession, the level of health care achieved prior to the recession and the type of austerity measures applied, but also on the type of the population studied with the most vulnerable groups being disproportionately affected.<sup>4,11,12</sup> Due to the latter, it was proposed that studies should focus on analyzing separately the subgroups most influenced by the crisis instead of presenting results as averages in a population.<sup>4</sup>

Greece has been markedly affected and still suffering the recent economic crisis. Between 2008 and 2016, the country's GDP *per capita* dropped by 26%, unemployment rate increased by more than 200% (from 7.6% to 23.3%) and the median disposable income decreased by 35%.<sup>13,14</sup> The GINI index, which measures income inequality, increased by 22% and the



1  
2 proportion of individuals at risk of poverty or social exclusion climbed to almost 36% in 2016.  
3  
4 Total health expenditures and government expenditure on health care were both decreased  
5  
6 by 34% per capita over the period 2008-2016,<sup>13,14</sup> whereas unmet healthcare needs  
7  
8 increased.<sup>15</sup> Besides, during the last years Greece experienced large refugee flows<sup>16,17</sup> with  
9  
10 an anticipated negative impact on the country's economy and population health indicators.  
11  
12 Adverse effects of financial crisis on perinatal factors, such as low birth weight, preterm birth  
13  
14 and stillbirth rates, have been also observed;<sup>18,19</sup> however, sparse data exist regarding the  
15  
16 potential association of the crisis with IMR. It has been initially reported that during the  
17  
18 period 2003-2012, IMR in Greece did not differ between the pre-crisis and crisis period  
19  
20 whereas, a later study showed that IMR increased between 2010 and 2015 as contrasted to  
21  
22 the steady decrease observed during the preceding decade.<sup>20,21</sup> Ecological correlations may  
23  
24 prone, however, to fallacies, whereas the different parts shaping the two main components  
25  
26 of IM, namely neonatal (NM) and post neonatal mortality (PNM), should have been distinctly  
27  
28 examined along with other factors possibly influencing the infants' health, especially  
29  
30 socioeconomic status and access to health care delivery.  
31  
32 The aims of the current study were to explore time trends in early (<7 days of life) and late  
33  
34 (7-27 days) neonatal, post neonatal (28-364 days) and total IM (0-364 days) in Greece during  
35  
36 the period 2004-2016 after taking into account nationality and place of residence, as well as  
37  
38 changes in the Human Development Index (HDI) during the study period as a proxy of  
39  
40 individual and collective measures of socioeconomic impact and health care access.  
41  
42  
43  
44  
45  
46  
47  
48  
49

## 50 **Materials and Methods**

51  
52 Following personal contact and a signed agreement, individual data for all livebirths and  
53  
54 infant (0-11 months) deaths were provided by the Hellenic Statistical Authority (ELSTAT) for  
55  
56 a 13-year period (2004-2016) in two separate files: one including live births and a second  
57  
58  
59  
60

1  
2 one, infant deaths; linkage of the two files was not possible as the personal identification  
3  
4 number was not available in ELSTAT. Information on maternal demographic characteristics,  
5  
6 such as nationality (available since 2004) and place of residence (available till 2014), as well  
7  
8 as on the infants' age of death, were also provided.  
9

10  
11 Mortality rates were calculated for infant (IM), early neonatal (0-6 days) (ENM), late  
12  
13 neonatal (7-27 days) (LNM) and post neonatal (28-364 days) period (PNM) using respective  
14  
15 numbers of deaths over the number of livebirths per year. Annual percent of change (APC)  
16  
17 during the study period were initially estimated through Poisson regression analysis using  
18  
19 the underlying population of each set as an offset variable. Subsequently, data were  
20  
21 stratified and analyzed by maternal nationality (Greek vs. non-Greek) and place of residence  
22  
23 (Urban/Semi-urban vs. Rural). Joinpoint regression analysis was thereafter applied to  
24  
25 automatically derive, through an algorithm, different segments in the mortality evolution  
26  
27 curves overall, as well as those by maternal nationality and place of residence. Interrupted  
28  
29 Time Series (ITS) analyses were also undertaken to explore the effect of crisis in alternative  
30  
31 years, notably 2008 indicating the maximum value of the Gross Domestic Product of the  
32  
33 country (Source: Aggregate National Accounts) considered to indicate the initiation of the  
34  
35 crisis, as well as two subsequent years notably 2010 and 2012 to control for any time lags in  
36  
37 observing the impact of the crisis. All ITS models were checked and appropriately adjusted  
38  
39 for possible auto-correlation.  
40  
41  
42  
43  
44

45  
46 Human development index (HDI) is a summary measure of average achievements of a  
47  
48 country's population in three areas including life expectancy, education and *per capita*  
49  
50 income indicators. Annual HDI values for the underlying populations in the year of death  
51  
52 were extracted from the United Nations Development Program website  
53  
54 (<http://hdr.undp.org/en/composite/HDI>), whereas Poisson regression analysis was used to  
55  
56 explore the association of one standard deviation of HDI with total IM and its components.  
57  
58  
59

1  
2 All statistical analyses were performed using the SAS software (V9.4, SAS Institute Inc.), Stata  
3 software program, version 13 (StataCorp. 2013. Stata Statistical Software: Release 13.  
4  
5  
6 College Station, TX: StataCorp LP) and Joinpoint Regression Program (Joinpoint Regression  
7  
8 Program, Version 4.5.0.1 - June 2017; Statistical Methodology and Applications Branch,  
9  
10 Surveillance Research Program, National Cancer Institute).

### 16 **Patient involvement**

17  
18 No patients were involved in setting the research question or the outcome measures, nor  
19  
20 were they involved in developing plans for design or implementation of the study. No  
21  
22 patients were asked to advise on interpretation or writing up of results. There are no plans  
23  
24 to disseminate the results of the research to study participants or the relevant patient  
25  
26 community.  
27  
28  
29  
30  
31

32 **Ethical approval:** Not required.  
33  
34  
35

### 36 **Results**

37  
38 The annual average number of livebirths during the study period was 105077, ranging from a  
39  
40 high 118302 (2008) to a low 91847 livebirths in 2015. The annual average proportion of  
41  
42 Greek mothers was 83.7%, whereas the remaining were mainly economic migrants. During  
43  
44 the period 2004-2016, a total of 4862 infant deaths were recorded of whom 4238 (87.2%)  
45  
46 were infants born to Greek mothers. During the early and late neonatal period, 2107 (43.3%)  
47  
48 and 1136 (23.4%) deaths occurred, respectively, whereas another 1617 (33.3%) of deaths  
49  
50 were recorded in the post neonatal period. The annual average IMR was 3.5 over 1000  
51  
52 livebirths. The corresponding figures for the early, late and post neonatal period were 1.5‰,  
53  
54 0.8‰ and 1.2‰ respectively. Of note, in the beginning of the study period in 2004, notably  
55  
56  
57  
58  
59  
60

1 well before the initiation of the crisis, IMR and its components were 2- to 4-fold higher  
2 among infants born to Greek mothers in comparison with rates in infants born to non-Greek  
3 origin mothers. During the subsequent 4-5 years, however, rates among Greeks followed  
4 downward trends whereas among non-Greeks inflated reaching almost similar values to  
5 those observed in infants born to Greek mothers (Figure 1).  
6  
7  
8  
9  
10  
11  
12

13 Overall, during the study-period, among infants born to Greek mothers, IMR, particularly  
14 PNMR, declined significantly (-0.9% and -1.6% annually, respectively,  $p=0.02$  for each), albeit  
15 differentially by place of residence (Table 1); significant decline of IMR trends (-3.5%  
16 annually,  $p<0.0001$ ) and all its components was observed among infants born to Greek  
17 mothers living in urban areas (maximum decrease in ENMR: -4.1% annually,  $p<0.0001$ )  
18 whereas, among infants born to Greek mothers in rural areas, a significant increase of IMR  
19 trend was observed (+5.2% annually,  $p=0.01$ ) resulting mainly from increased ENMR (+24.1%  
20 annually,  $p<0.0001$ ). By contrast, among infants of non-Greek mothers, the low starting IMR  
21 increased significantly by +9.4% annually ( $p<0.0001$ ), due to significant increases of ENMR,  
22 LNMR and PNMR (max ENMR: +12.5% annually,  $p<0.0001$ ) leading to an erroneously non-  
23 significant pattern of IMR evolution for Greece overall ( $p=0.50$ ). The inverse associations of  
24 HDI with IMR, ENMR and PNMR were restricted to Greek mothers' infants (Table 1).  
25  
26  
27  
28  
29  
30  
31  
32  
33  
34  
35  
36  
37  
38  
39  
40

41 Results of joinpoint regression analyses were similar to those derived by the Poisson  
42 regression apart from models displayed in Table 2 pertaining to IMR and ENMR trends.  
43 Specifically, a break was identified among Greek infants restricting the decreasing IMR trend  
44 to the period 2004-2012 (-4.5% annually,  $p=0.01$ ); this was mainly due to a significant  
45 decline in ENMR trend till 2011 (-6.5% annually,  $p=0.02$ ). Of note, however, in the most  
46 recent study period (2012-2016) sizeable, borderline significant increases of IMR (+9.3%  
47 annually,  $p=0.07$ ) and ENMR (+10.2% annually,  $p=0.06$ ) were observed with no indication  
48 any more of differentiation by place of residence. By contrast, among infants born to non-  
49  
50  
51  
52  
53  
54  
55  
56  
57  
58  
59  
60

1  
2 Greek mothers, the high IMR increases (+17.1% annually,  $p=0.002$ ) were restricted to the  
3  
4 period 2004-2011 with no fluctuation thereafter; finally, IMR approximated those of Greek  
5  
6 mothers' infants.  
7

8  
9 ITS analyses in the preset years 2008, 2010 and 2012 confirmed the joinpoint analysis results  
10  
11 and further identified adverse trends in LNMR and PNMR after 2012 among Greek infants  
12  
13 (Figure 2).  
14

## 15 16 17 18 **Discussion**

19  
20 Trends of neonatal and infant mortality in Greece, spanning from year 2004 -before the  
21  
22 initiation of crisis in 2008- to year 2016, are not homogeneous, given significant increases in  
23  
24 the relatively small proportion of infants born to non-Greek nationality mothers, observed  
25  
26 essentially before the crisis, as contrasted to declining IMR trends among Greek infants, and  
27  
28 increases in indices indicating differentials in proxies of health care access among Greek  
29  
30 neonates, such as ENMR, noted ~four years after the crisis, which led to offsets of the  
31  
32 urbanization differentials observed overall. Specifically, the “brake” of 2012 identified  
33  
34 borderline increases of ~10% annually, thereafter, in IMR and ENMR trends among infants  
35  
36 born to Greek mothers. Changes in HDI during the study period were also reflected in the  
37  
38 inverse associations of ENMR and IMR, but also PNMR, among infants born to Greek  
39  
40 mothers.  
41  
42  
43  
44

45  
46 Strengths of the present investigation, as contrasted to previously greek-based published  
47  
48 studies,<sup>9,18,20,21,22</sup> include the longest follow-up period of national data, namely since 2004,  
49  
50 before the crisis, when the first data on maternal ethnicity became electronically available, to  
51  
52 the latest available year 2016. Of great importance is also the fact that, for the first time, the  
53  
54 maternal ethnicity was considered in the analyses explaining part, if not most, of the  
55  
56 heterogeneity of trends through the study period. To this end, three complimentary  
57  
58  
59

1  
2 statistical methodologies were used to describe the overall evolution depicted in Figure 1.  
3  
4 Thus, we were able to enhance the validity of the results pertaining to the study of the  
5  
6 evolution of individual IMR components, namely ENMR, LNMR and PNMR, in association  
7  
8 with socioeconomic factors (i.e maternal nationality, place of residence and HDI) for which  
9  
10 individual data have been available on a nationwide level among both deaths and livebirths  
11  
12 during the study period. Calculation of IMR and its components was based on the number of  
13  
14 livebirths; yet, the absence of a linkage system between birth and death data, as well as  
15  
16 other official registries in Greece, has not allowed use of known determinants of  
17  
18 socioeconomic deprivation or social coherence, such as parental education,  
19  
20 employment/occupation marital status, family income and household size. Neither were  
21  
22 data on the role of biological factors, such as parental age, gestational age and birthweight or  
23  
24 multiplicity of pregnancy available for both the livebirths and deaths series.<sup>5,19,23</sup> Lastly,  
25  
26 analyses by specific cause of infant death were not set among outcome measures of this  
27  
28 study.  
29  
30  
31  
32  
33

34 Assessing migration as a determinant of perinatal health outcome and infant death in the  
35  
36 developed countries is a complex undertaking resulting in conflicting results of published  
37  
38 studies. Specifically, some studies, have shown that ethnic minority is a significant risk factor  
39  
40 for unfavorable perinatal outcomes and increased neonatal and infant mortality,<sup>18,24-31</sup>  
41  
42 especially if it coincides with a financial crisis, as was the cases in Greece. Factors possibly  
43  
44 contributing to the increased risk for poorer outcomes among children born to migrants  
45  
46 include socioeconomic disadvantage, poor communication, discrimination, reduced  
47  
48 utilization of health facilities, low quality of care, but also stress and consanguinity or  
49  
50 differing attitudes to screening and termination of pregnancy associated with preterm birth,  
51  
52 low birth weight or congenital anomalies and lethal inherited diseases.<sup>24,28,32-34</sup> By contrast,  
53  
54 other studies present similar or even better perinatal health outcomes among some migrant  
55  
56  
57  
58  
59  
60

1  
2 groups than among natives (“healthy migrant effect/paradox”).<sup>24-26,35,36</sup> Refugees have been  
3  
4 recognized as the most vulnerable group suffering increased severe neonatal morbidity and  
5  
6 infant mortality risk,<sup>24,26</sup> although no absolutely clear pattern regarding refugee or non-  
7  
8 refugee status among migrants has been identified.<sup>32</sup>  
9

10  
11 In our study, starting rates of IMR and its components among infants born to non-Greek  
12  
13 mothers were lower compared to those of Greek mothers. The numbers by individual  
14  
15 maternal nationality were, however, small to explore the tentative influence of the changing  
16  
17 maternal nationality case mix during the study period. Of note, the ratio of non-Greek infants  
18  
19 among live births during 2009-2016 vs. 2004-2008 was only 1.32, whereas the respective  
20  
21 figure among infant deaths was almost 3-fold (data not shown). Indeed, a considerable  
22  
23 proportion of non-Greek pregnant women before the crisis were serving as home-aids in  
24  
25 relatively affluent Greek families, as contrasted to the adverse conditions envisaged by  
26  
27 pregnant women and their offspring during the most recent massive migration movements  
28  
29 from deprived countries to European Union member states via Greece which coincided with  
30  
31 the crisis in our country. Actually, in the pre-crisis era non-Greek mothers of newborn  
32  
33 comprised mainly economic migrants, most of them of Albanian nationality living for many  
34  
35 years, or even born, in Greece. After 2008, Greece experienced an unprecedented influx of  
36  
37 refugees with the majority of them fleeing from war and terror in Syria, Occupied Palestinian  
38  
39 Territory, but also from Afghanistan, Iraq and other countries.<sup>16,17</sup>  
40  
41  
42  
43  
44

45  
46 The strongly decreasing IMR, especially ENMR, trends among Greek infants were stagnated  
47  
48 after a lag time of ~four years of crisis and equalized with the previously sharply increasing  
49  
50 trends among non-Greek maternal nationality infants; this time lag is reasonable<sup>37</sup> and in line  
51  
52 with previous findings showing that following reductions in the government healthcare  
53  
54 spending in Europe, the greatest negative effect on neonatal and post neonatal mortality was  
55  
56 4 and 5 years later, respectively.<sup>6</sup> The irony is that the period 2012-2016, during which the  
57  
58  
59

1  
2 crisis was deepening<sup>13,14</sup> and stricter economic austerity measures were applied,<sup>38</sup> disparities  
3  
4 gap in IMR trends diminished against the Greek population; IMR trends deteriorated only in  
5  
6 infants born to Greek mothers, whereas in infants born to non-Greek mothers IMR trends  
7  
8 approached an anelastic highest value up to 2011 with no fluctuation thereafter.  
9

10  
11 Disparities in IMR still exist across geographic areas even in well developed countries; i.e.  
12  
13 IMR in the United States vary by urbanization level of maternal residency being lowest in  
14  
15 large urban counties but highest in rural areas.<sup>39</sup> Rural women may face health challenges  
16  
17 related to geographic barriers to care (less timely and/or appropriate care) and physician  
18  
19 shortages, but they may also present differences in a number of socioeconomic and  
20  
21 demographic risk factors, such as less education, lower income, younger age at pregnancy,  
22  
23 or greater number of children, in comparison with their urban counterparts.<sup>40,41</sup> Disparities  
24  
25 in IMR trends between urban/semi urban and rural areas in Greece would not be surprising  
26  
27 if changes in IMR trends were observed in the same direction; the increasing IMR trends  
28  
29 during the study period in infants born to Greek mothers living in rural areas, as opposed to  
30  
31 the declining IMR trends in those born to Greek mothers living in urban/semi urban areas, is  
32  
33 worrisome; specific causes should be further studied and addressed. The increasing IMR  
34  
35 trends in infants born to non-Greek mothers despite living in urban areas can be explained  
36  
37 by previous reports showing that other risk factors, i.e. young maternal age (<20 years) or  
38  
39 maternal ethnic minority, may be more powerful than place of residence.<sup>41</sup>  
40  
41  
42  
43  
44

45  
46 As expected, among the three IMR components, ENMR was the most “sensitive” in reflecting  
47  
48 adverse impacts on child health as further reflected in the IMR trends. Specifically, ENMR  
49  
50 was overall positively associated with rural place of residence of Greek children, notably  
51  
52 before the “break” of 2012, with the increased ENMR neutralizing the urbanization  
53  
54 differentials among newborn of Greek mothers. ENMR in developed countries, including  
55  
56 Greece. represents more than 70% of infant deaths on account mainly of prematurity/low  
57  
58  
59



1  
2 birth weight and congenital anomalies.<sup>14,42-45</sup> Actually, it reflects perinatal health and care  
3  
4 during pregnancy and labor, and also postnatal care in the first week of life.<sup>44</sup> Increased  
5  
6 incidence of impaired perinatal parameters including low birth weight, prematurity,  
7  
8 increased maternal age and rate of caesarian section, and also increased stillbirth rate in  
9  
10 Greek women younger than 25 years of age, has been reported during the years of the  
11  
12 economic decline in Greece.<sup>18,19</sup> Cuts in public health expenditures between 2008 and 2016,  
13  
14 reduction in health care workforce and pediatric nurses, as well as reduction in the number  
15  
16 of obstetrics beds, obstetricians and midwives (-45.5%, -60.2% and -27.5%, respectively)<sup>14</sup>  
17  
18 could possibly explain, at least in part, the observed increases in ENMR trends during the  
19  
20 study period in Greece.  
21  
22  
23

24  
25 The exact mechanisms leading to the disparities in trends of neonatal and infant mortality  
26  
27 observed in this study remain to be further explored. Specific maternal, family and infant  
28  
29 features, including detailed and punctual information on the causes of infant deaths, would  
30  
31 have shed more light on the links between IMR trends and socioeconomic factors but were  
32  
33 beyond the scope of this article and left for future research. Meanwhile, policies and  
34  
35 programs should be implemented to mitigate the negative impact of the crisis on population  
36  
37 and infant health in Greece. Vulnerable groups, such as mothers of non-Greek nationality, of  
38  
39 low income, or rural place of residence, should be specifically addressed and their rights to  
40  
41 health protected. Strong governmental integration policy for minorities paired with  
42  
43 initiatives to improve social coherence, a deeply rooted mechanism for protection of health  
44  
45 among those in need in the Greek society, along with improvements in primary health care  
46  
47 delivery could help to alleviate the cost in infant lives and ensure healthy adulthood.<sup>30,45</sup>  
48  
49 Irrespective of the crisis, improvements in the quality of perinatal care, such as centralization  
50  
51 of very preterm deliveries, establishment of regional perinatal centers, and monitoring of  
52  
53  
54  
55  
56  
57  
58  
59  
60

1  
2 the implementation of evidence-based practices, could decrease ENMR and improve the  
3  
4 perinatal indicators.<sup>44</sup>  
5  
6  
7

## 8 9 REFERENCES

- 10  
11 1. Petridou E, Valadian I, Trichopoulos D, Tzonou A, Kyriopoulos Y, Matsaniotis N. Medical  
12 services and socioeconomic factors: Determinants of infant mortality in Greece. *Hygie*  
13 1989;3:20-3.  
14  
15 2. WHO. The determinants of health. [http://www. who.int/hia/evidence/doh/en](http://www.who.int/hia/evidence/doh/en) (Date of  
16 access: 30/5/2018)  
17  
18 3. Zylbersztejn A, Gilbert R, Hjern A, Wijlaars L, Hardelid P. Child mortality in England  
19 compared with Sweden: a birthcohort study. *Lancet* 2018;391(10134):2008-2018.  
20 doi:10.1016/S0140-6736(18)30670-6.  
21  
22 4. Rajmil L, Fernandez de Sanmamed MJ, Choonara I, et al; International Network for  
23 Research in Inequalities in Child Health (INRICH). Impact of the 2008 economic and financial  
24 crisis on child health: a systematic review. *Int J Environ Res Public Health* 2014;11:6528-46.  
25 doi:10.3390/ijerph110606528.  
26  
27 5. Glonti K, Gordeev VS, Goryakin Y, Reeves A, Stuckler D, McKee M, Roberts B. A systematic  
28 review on health resilience to economic crises. *PLoS One* 2015;10:e0123117.  
29 doi:10.1371/journal.pone.0123117.  
30  
31 6. Budhdeo S, Watkins J, Atun R, Williams C, Zeltner T, Maruthappu M. Changes in  
32 government spending on healthcare and population mortality in the European union, 1995–  
33 2010: a cross-sectional ecological study. *J R Soc Med* 2015;108:490-8.  
34 doi:10.1177/0141076815600907.  
35  
36  
37  
38  
39  
40  
41  
42  
43  
44  
45  
46  
47  
48  
49  
50  
51  
52  
53  
54  
55  
56  
57  
58  
59  
60

- 1  
2  
3  
4  
5  
6  
7  
8  
9  
10  
11  
12  
13  
14  
15  
16  
17  
18  
19  
20  
21  
22  
23  
24  
25  
26  
27  
28  
29  
30  
31  
32  
33  
34  
35  
36  
37  
38  
39  
40  
41  
42  
43  
44  
45  
46  
47  
48  
49  
50  
51  
52  
53  
54  
55  
56  
57  
58  
59  
60
7. Tapia Granados JA, Rodriguez JM. Health, economic crisis, and austerity: A comparison of Greece, Finland and Iceland. *Health Policy* 2015;119:941-53. doi:10.1016/j.healthpol.2015.04.009.
8. Regidor E, Barrio G, Bravo MJ, de la Fuente L. Has health in Spain been declining since the economic crisis? *J Epidemiol Community Health* 2014;68:280-2. doi:10.1136/jech-2013-202944.
9. Laliotis I, Ioannidis JPA, Stavropoulou C. Total and cause-specific mortality before and after the onset of the Greek economic crisis: an interrupted time-series analysis. *Lancet Public Health* 2016;1: e56–e65. doi:10.1016/S2468-2667(16)30018-4.
10. Parmar D, Stavropoulou C, Ioannidis JP. Health outcomes during the 2008 financial crisis in Europe: systematic literature review. *BMJ* 2016;354:i4588. doi:10.1136/bmj.i4588.
11. O'Donnell C, Burns N, Dowrick C, Lionis C, MacFarlane A; RESTORE team. Health-care access for migrants in Europe. *Lancet* 2013; 382:393. doi: 10.1016/S0140-6736(13)61666-9.
12. Karanikolos M, Heino P, McKee M, Stuckler D, Legido-Quigley H. Effects of the Global Financial Crisis on Health in High-Income OECD Countries: A Narrative Review. *Int J Health Serv* 2016;46:208-40. doi: 10.1177/0020731416637160.
13. Organisation for Economic Co-operation and Development OECD data. <https://data.oecd.org> (Date of access: 30/5/2018) (2016).
14. Hellenic Statistical Authority *Statistics*. [www.statistics.gr](http://www.statistics.gr) (Date of access: 30/5/2018) (2016).
15. Zavras D, Zavras AI, Kyriopoulos II, Kyriopoulos J. Economic crisis, austerity and unmet healthcare needs: the case of Greece. *BMC Health Serv Res* 2016;16:309. doi:10.1186/s12913-016-1557-5.
16. European Union. The EU and the migration crisis, July 2017, <http://publications.europa.eu>

- 1  
2  
3  
4  
5  
6  
7  
8  
9  
10  
11  
12  
13  
14  
15  
16  
17  
18  
19  
20  
21  
22  
23  
24  
25  
26  
27  
28  
29  
30  
31  
32  
33  
34  
35  
36  
37  
38  
39  
40  
41  
42  
43  
44  
45  
46  
47  
48  
49  
50  
51  
52  
53  
54  
55  
56  
57  
58  
59  
60
17. Mertens E, Rockenschaub G, Economopoulou A, Kreidl P. Assessment of public health issues of migrants at the Greek-Turkish border, April 2011. *Euro Surveill* 2012 Jan 12;17(2). pii: 20056.
18. Zografaki I, Papamichail D, Panagiotopoulos T. Adverse effect of the financial crisis in Greece on perinatal factors. *Eur J Public Health* 2018 [Epub ahead of print]. doi: 10.1093/eurpub/cky078.
19. Sdoná E, Papamichail D, Ragkou E, Briana DD, Malamitsi-Puchner A, Panagiotopoulos T. Greek economic crisis and impaired perinatal parameters: experience from a public maternity hospital. *J Matern Fetal Neonatal Med* 2018;31:2371-5. doi:10.1080/14767058.2017.1342803.
20. Michas G, Varytimiadi A, Chasiotis I, Micha R. Maternal and child mortality in Greece. *Lancet* 2014;383:691-2. doi:10.1016/S0140-6736(14)60251-8.
21. Filippidis F, Gerovasili V, Millett C, Tountas Y. Medium-term impact of the economic crisis on mortality, health-related behaviours and access to healthcare in Greece. *Sci Rep* 2017;7:46423. doi:10.1038/srep46423.
22. Simou E, Koutsogeorgou E. Effects of the economic crisis on health and healthcare in Greece in the literature from 2009 to 2013: a systematic review. *Health Policy* 2014;115:111-9. doi: 10.1016/j.healthpol.2014.02.002.
23. Petridou ET, Georgakis MK, Erdmann F, et al. Advanced parental age as risk factor for childhood acute lymphoblastic leukemia: results from studies of the Childhood Leukemia International Consortium. *Eur J Epidemiol* 2018. doi:10.1007/s10654-018-0402-z. [Epub ahead of print].
24. Gissler M, Alexander S, MacFarlane A, et al. Stillbirths and infant deaths among migrants in industrialized countries. *Acta Obstet Gynecol Scand* 2009;88:134-48. doi:10.1080/00016340802603805.

- 1  
2  
3  
4  
5  
6  
7  
8  
9  
10  
11  
12  
13  
14  
15  
16  
17  
18  
19  
20  
21  
22  
23  
24  
25  
26  
27  
28  
29  
30  
31  
32  
33  
34  
35  
36  
37  
38  
39  
40  
41  
42  
43  
44  
45  
46  
47  
48  
49  
50  
51  
52  
53  
54  
55  
56  
57  
58  
59  
60
25. Gagnon AJ, Zimbeck M, Zeitlin J, et al. Migration to western industrialized countries and perinatal health: a systematic review. *Soc Sci Med* 2009;69:934-46. doi:10.1016/j.socscimed.2009.06.027.
26. Wanigaratne S, Cole DC, Bassil K, et al. Severe Neonatal Morbidity Among Births to Refugee Women. *Matern Child Health J* 2016;20:2189-98. doi:10.1007/s10995-016-2047-4.
27. Puthussery S. Perinatal outcomes among migrant mothers in the United Kingdom: Is it a matter of biology, behaviour, policy, social determinants or access to health care? *Best Pract Res Clin Obstet Gynaecol* 2016;32:39-49. doi:10.1016/j.bpobgyn.2015.09.003.
28. Wanner P, Bollini P. The contribution of the foreign population to the high level of infant mortality in Switzerland: a demographic analysis. *BMC Pregnancy Childbirth* 2017;17:151. doi:10.1186/s12884-017-1332-6.
29. Cantarutti A, Franchi M, Monzio Compagnoni M, Merlino L, Corrao G. Mother's education and the risk of several neonatal outcomes: an evidence from an Italian population-based study. *BMC Pregnancy Childbirth* 2017;17:221. doi:10.1186/s12884-017-1418-1.
30. Bollini P, Pampallona S, Wanner P, Kupelnick B. Pregnancy outcome of migrant women and integration policy: a systematic review of the international literature. *Soc Sci Med* 2009;68:452-61. doi:10.1016/j.socscimed.2008.10.018.
31. Gotsens M, Malmusi D, Villarroel N, et al. Health inequality between immigrants and natives in Spain: the loss of the healthy immigrant effect in times of economic crisis. *Eur J Public Health* 2015;25:923-9. doi:10.1093/eurpub/ckv126.
32. Nybo Andersen AM, Gundlund A, Villadsen SF. Stillbirth and congenital anomalies in migrants in Europe. *Best Pract Res Clin Obstet Gynaecol* 2016;32:50-9. doi:10.1016/j.bpobgyn.2015.09.004.

- 1  
2  
3  
4  
5  
6  
7  
8  
9  
10  
11  
12  
13  
14  
15  
16  
17  
18  
19  
20  
21  
22  
23  
24  
25  
26  
27  
28  
29  
30  
31  
32  
33  
34  
35  
36  
37  
38  
39  
40  
41  
42  
43  
44  
45  
46  
47  
48  
49  
50  
51  
52  
53  
54  
55  
56  
57  
58  
59  
60
33. Di Renzo GC, Tosto V, Giardina I. The biological basis and prevention of preterm birth. *Best Pract Res Clin Obstet Gynaecol* 2018. doi:10.1016/j.bpobgyn.2018.01.022. [Epub ahead of print].
34. Wanigaratne S, Cole DC, Bassil K, Hyman I, Moineddin R, Urquia ML. The influence of refugee status and secondary migration on preterm birth. *J Epidemiol Community Health* 2016;70:622-8. doi:10.1136/jech-2015-206529.
35. Kirby RS. Perinatal outcomes and nativity: does place of birth really influence infant health? *Birth* 2011;38:354-6. doi:10.1111/j.1523-536X.2011.00505.x.
36. Sdoná E, Papamichail D, Ragkou E, et al. Migration status and perinatal parameters in a Greek public maternity hospital: an illustration of the "healthy immigrant effect". *J Matern Fetal Neonatal Med* 2017. doi: 10.1080/14767058.2017.1371131. [Epub ahead of print].
37. Karanikolos M, Mladovsky P, Cylus J, et al. Financial crisis, austerity, and health in Europe. *Lancet* 2013;381:1323-31. doi:10.1016/S0140-6736(13)60102-6.
38. Burki T. Health under austerity in Greece. *Lancet* 2018;391:525-6. doi:10.1016/S0140-6736(18)30242-3.
39. Ely DM, Driscoll AK, Mathews TJ. Infant mortality rates in rural and urban areas in the United States, 2014. *NCHS data brief*, No 285. Hyattsville, MD: National Center for Health Statistics, 2017.
40. Van de Poel E, O'Donnell O, Van Doorslaer E. What explains the rural-urban gap in infant mortality: household or community characteristics? *Demography* 2009;46:827-50. doi:org/10.1353/dem.0.0074.
41. Harris DE, Aboueissa AM, Baugh N, Sarton C. Impact of rurality on maternal and infant health indicators and outcomes in Maine. *Rural Remote Health* 2015;15:3278.
42. Heron M. Deaths: Leading Causes for 2015. *Natl Vital Stat Rep* 2017;66:1-76.

- 1  
2  
3  
4  
5  
6  
7  
8  
9  
10  
11  
12  
13  
14  
15  
16  
17  
18  
19  
20  
21  
22  
23  
24  
25  
26  
27  
28  
29  
30  
31  
32  
33  
34  
35  
36  
37  
38  
39  
40  
41  
42  
43  
44  
45  
46  
47  
48  
49  
50  
51  
52  
53  
54  
55  
56  
57  
58  
59  
60
43. Roncancio CP, Misnaza SP, Peña IC, Prieto FE, Cannon MJ, Valencia D. Trends and characteristics of fetal and neonatal mortality due to congenital anomalies, Colombia 1999-2008. *J Matern Fetal Neonatal Med* 2018;31:1748-55. doi:10.1080/14767058.2017.1326901.
44. Lehtonen L, Gimeno A, Parra-Llorca A, Vento M. Early neonatal death: A challenge worldwide. *Semin Fetal Neonatal Med* 2017;22:153-60. doi:10.1016/j.siny.2017.02.006.
45. Alexander M, Harding M, Lamarche C. Quantifying the impact of economic crises on infant mortality in advanced economies. *Applied Economics* 2011; 43: 3313–23. doi:10.1080/00036840903559620.

1  
2 **Contributors:** EP and GC were involved in the initial conception of the study. All authors  
3  
4 contributed to the design, analysis and interpretation of data. TS, ND and EP developed the  
5  
6 first draft of the manuscript and all authors critically revised it and approved the final  
7  
8 version. All authors agree to be accountable for all aspects of the work in ensuring that  
9  
10 questions related to the accuracy or integrity of any part of the work are appropriately  
11  
12 investigated and resolved. The corresponding author ensures that all the journal's  
13  
14 administrative requirements are properly completed.  
15  
16

17  
18 ELSTAT has provided individual anonymized data.  
19  
20  
21  
22

23 **Data sharing:** No additional data available.  
24  
25  
26

#### 27 **Funding Statement**

28  
29 This research received no specific grant from any funding agency in the public, commercial  
30  
31 or not-for-profit sectors'  
32  
33  
34  
35

#### 36 **Competing interests statement**

37  
38 All authors have completed the ICMJE uniform disclosure form at  
39  
40 [www.icmje.org/coi\\_disclosure.pdf](http://www.icmje.org/coi_disclosure.pdf) and declare: no support from any organization for the  
41  
42 submitted work; no financial relationships with any organizations that might have an interest  
43  
44 in the submitted work in the previous three years; no other relationships or activities that  
45  
46 could appear to have influenced the submitted work.  
47  
48  
49  
50  
51  
52  
53  
54  
55  
56  
57  
58  
59  
60



## Figure Legends

**Figure 1.** Infant, Early, Late and Post Neonatal Mortality Rates in Greece (2004-2016) overall and by maternal nationality

**Figure 2.** Interrupted Time Series analyses for evolution of infant (IMR), early (ENMR), late (LNMR) and post neonatal mortality rates (PNMR) by maternal nationality in alternative years of interest (2008, 2010 and 2012)

Figure 2A) infants born to Greek mothers; Figure 2B) infants born to Non-Greek mothers

**Table 1.** Poisson regression derived changes and 95% Confidence Intervals (CI) of infant (IMR), early (ENMR), late (LNMR) and postneonatal mortality rates (PNMR) in time periods with available data: Annual Percent of Change (APC) for place of residence (2004-2014) and maternal nationality (2004-2016); Percent of Change (PC) for 1 Standard Deviation of Human Development Index (HDI, 2000-2015) controlling for year.

| Variable             | IMR  |                           |                  | ENMR |                            |                  | LNMR |                          |              | PNMR |                            |              |
|----------------------|------|---------------------------|------------------|------|----------------------------|------------------|------|--------------------------|--------------|------|----------------------------|--------------|
|                      | N    | APC (95% CI)              | p-value          | N    | APC (95% CI)               | p-value          | N    | APC (95% CI)             | p-value      | N    | APC (95% CI)               | p-value      |
| Maternal nationality |      |                           |                  |      |                            |                  |      |                          |              |      |                            |              |
| Greek                | 4238 | <b>-0.9 (-1.7,-0.1)</b>   | <b>0.02</b>      | 1849 | -0.6 (-1.8,0.7)            | 0.35             | 995  | -0.6 (-2.3,1.1)          | 0.46         | 1393 | <b>-1.6 (-3.0,-0.2)</b>    | <b>0.02</b>  |
| Non-Greek            | 615  | <b>9.4 (6.9,11.9)</b>     | <b>&lt;.0001</b> | 258  | <b>12.5 (8.6,16.5)</b>     | <b>&lt;.0001</b> | 138  | <b>8.0 (3.1,13.2)</b>    | <b>0.001</b> | 218  | <b>4.4 (0.6,8.4)</b>       | <b>0.02</b>  |
| Any*                 | 4862 | 0.3 (-0.5, 1.0)           | 0.50             | 2107 | 0.9 (-0.3,2.1)             | 0.13             | 1136 | 0.4 (-1.2,2.0)           | 0.65         | 1617 | -0.9 (-2.2,0.5)            | 0.20         |
| Urbanization         |      |                           |                  |      |                            |                  |      |                          |              |      |                            |              |
| Urban-Semi urban     |      |                           |                  |      |                            |                  |      |                          |              |      |                            |              |
| Greek                | 3305 | <b>-3.5 (-4.6, -2.4)</b>  | <b>&lt;.0001</b> | 1476 | <b>-4.1 (-5.7, -2.5)</b>   | <b>&lt;.0001</b> | 781  | <b>-2.7 (-4.9, -0.5)</b> | <b>0.02</b>  | 1048 | <b>-3.3 (-5.2, -1.4)</b>   | <b>0.001</b> |
| Non-Greek            | 494  | <b>13.3 (9.9, 16.9)</b>   | <b>&lt;.0001</b> | 208  | <b>19.4 (13.7, 25.3)</b>   | <b>&lt;.0001</b> | 110  | <b>11.2 (4.2, 18.6)</b>  | <b>0.001</b> | 176  | <b>8.2 (2.8, 13.8)</b>     | <b>0.002</b> |
| Any*                 | 3807 | <b>-1.6 (-2.6, -0.6)</b>  | <b>0.002</b>     | 1684 | <b>-1.7 (-3.2, -0.1)</b>   | <b>0.03</b>      | 894  | -1.2 (-3.3, 0.9)         | 0.27         | 1229 | <b>-1.8 (-3.6, 0.0)</b>    | <b>0.05</b>  |
| Rural                |      |                           |                  |      |                            |                  |      |                          |              |      |                            |              |
| Greek                | 275  | <b>5.2 (1.3, 9.3)</b>     | <b>0.01</b>      | 69   | <b>24.1 (14.2, 34.8)</b>   | <b>&lt;.0001</b> | 62   | 4.6 (-3.4, 13.3)         | 0.27         | 144  | -2 (-7.1, 3.3)             | 0.44         |
| Non-Greek            | 22   | -6.9 (-19.4, 7.5)         | 0.33             | 7    | 14.8 (-8.0, 43.3)          | 0.22             | 3    | -1.9 (34.7, 47.4)        | 0.93         | 12   | -12.4 (-32.0, 12.9)        | 0.31         |
| Any*                 | 298  | <b>4.3 (0.6, 8.2)</b>     | <b>0.02</b>      | 76   | <b>24.4 (14.8, 34.7)</b>   | <b>&lt;.0001</b> | 65   | 3.6 (-4.2, 12.1)         | 0.38         | 157  | -3.4 (-8.2, 1.6)           | 0.18         |
| HDI                  |      |                           |                  |      |                            |                  |      |                          |              |      |                            |              |
| PC                   |      |                           | PC               |      |                            | PC               |      |                          | PC           |      |                            |              |
| Greek                |      | <b>-8.6 (-14.8, -1.9)</b> | <b>0.01</b>      |      | <b>-11.3 (-20.8, -1.4)</b> | <b>0.03</b>      |      | 3.5 (-10.9, 20.1)        | 0.66         |      | <b>-12.3 (-22.2, -1.2)</b> | <b>0.03</b>  |
| Non-Greek            |      | -5.7 (-25.0, 18.7)        | 0.62             |      | -19.8 (-44.8, 16.6)        | 0.25             |      | 20.0 (-28.6, 101.7)      | 0.49         |      | -1.3 (-30.7, 40.5)         | 0.94         |
| Any*                 |      | <b>-9.5 (15.3, -3.2)</b>  | <b>0.004</b>     |      | <b>-14.0 (-22.3, -4.7)</b> | <b>0.004</b>     |      | 3.3 (-10.4, 19.3)        | 0.65         |      | <b>-11.4 (-20.8, -0.7)</b> | <b>0.04</b>  |

\*including missing maternal nationality values

**Table 2.** Joinpoint regression derived Annual Percent of Change (APC) and 95% Confidence Intervals (CI) of infant (IMR) and early neonatal mortality rates (ENMR) by maternal nationality (only for indices showing breaks in the time period examined).

| Variable  | Years   | N    | IMR<br>APC (95% CI) | p-value | Time period | N    | ENMR<br>APC (95% CI) | p-value |
|-----------|---------|------|---------------------|---------|-------------|------|----------------------|---------|
| Greek     | 2004-12 | 2870 | -4.5 (-7.6, -1.3)   | 0.01    | 2004-11     | 1118 | -6.5 (-11.4, -1.4)   | 0.02    |
|           | 2012-16 | 1368 | 9.3 (-1.1, 20.9)    | 0.07    | 2011-16     | 731  | 10.2 (-0.4, 21.9)    | 0.06    |
| Non-Greek | 2004-11 | 333  | 17.1 (8.1, 26.9)    | 0.002   |             |      |                      |         |
|           | 2011-16 | 282  | 0.2 (-11.5, 13.5)   | 0.97    |             |      |                      |         |
| Any*      | 2004-08 | 1807 | -7.5(-14.6, 0.3)    | 0.06    | 2004-08     | 780  | -10.7 (-19.9, -0.5)  | 0.04    |
|           | 2008-16 | 3055 | 3.6 (0.7, 6.6)      | 0.02    | 2008-16     | 1327 | 6.1 (2.1, 10.3)      | 0.01    |

\* Including missing maternal nationality values

For peer review only

1  
2  
3  
4  
5  
6  
7  
8  
9  
10  
11  
12  
13  
14  
15  
16  
17  
18  
19  
20  
21  
22  
23  
24  
25  
26  
27  
28  
29  
30  
31  
32  
33  
34  
35  
36  
37  
38  
39  
40  
41  
42  
43  
44  
45  
46  
47

1  
2  
3  
4  
5  
6  
7  
8  
9  
10  
11  
12  
13  
14  
15  
16  
17  
18  
19  
20  
21  
22  
23  
24  
25  
26  
27  
28  
29  
30  
31  
32  
33  
34  
35  
36  
37  
38  
39  
40  
41  
42  
43  
44  
45  
46  
47  
48  
49  
50  
51  
52  
53  
54  
55  
56  
57  
58  
59  
60

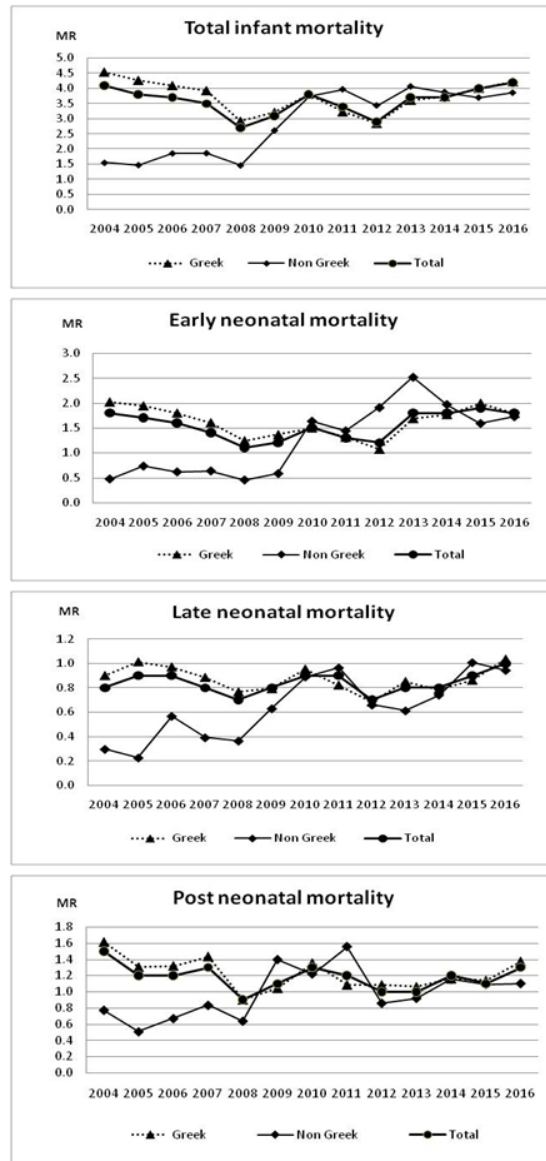

Infant, Early, Late and Post Neonatal Mortality Rates in Greece (2004-2016) overall and by maternal nationality

190x254mm (96 x 96 DPI)

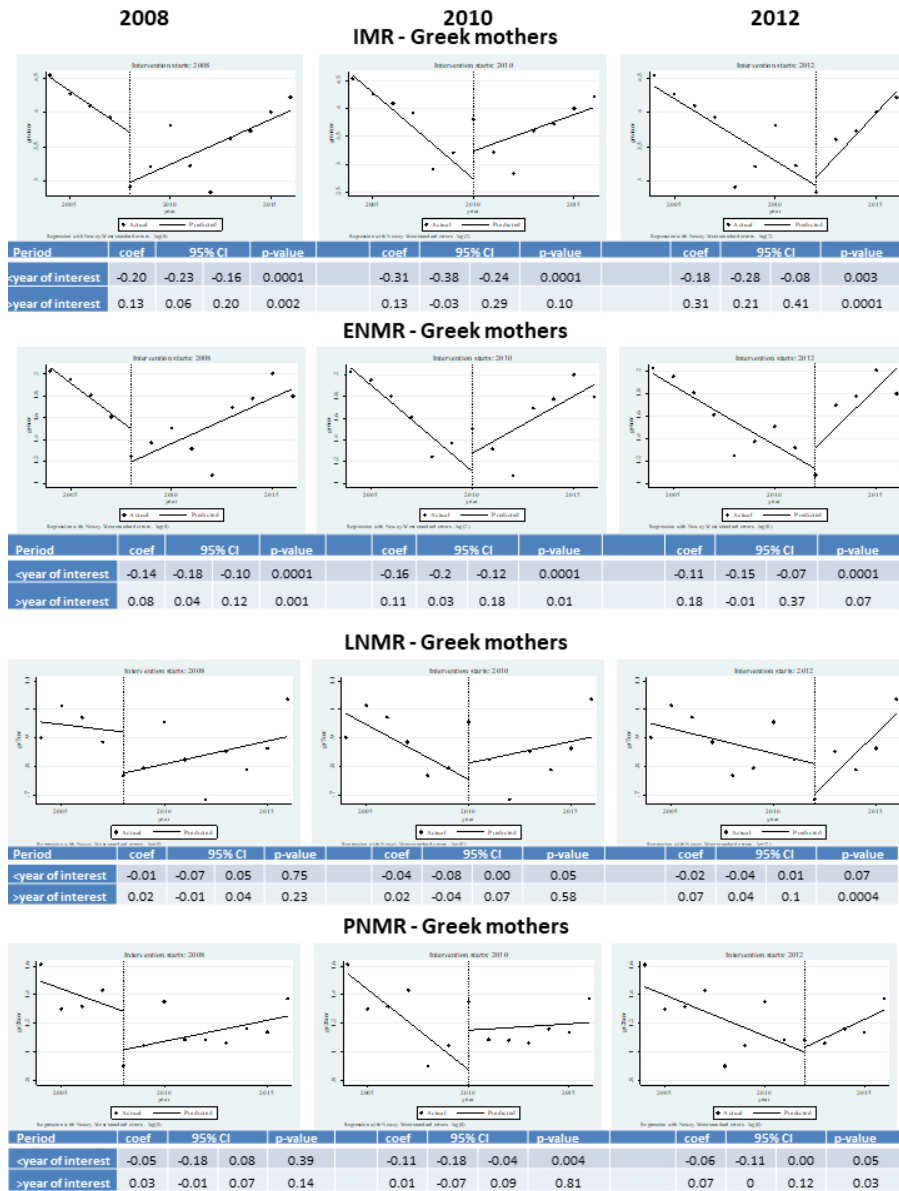

Interrupted Time Series analyses for evolution of infant (IMR), early (ENMR), late (LNMR) and post neonatal mortality rates (PNMR) by maternal nationality in alternative years of interest (2008, 2010 and 2012) in infants born to Greek mothers

190x254mm (96 x 96 DPI)

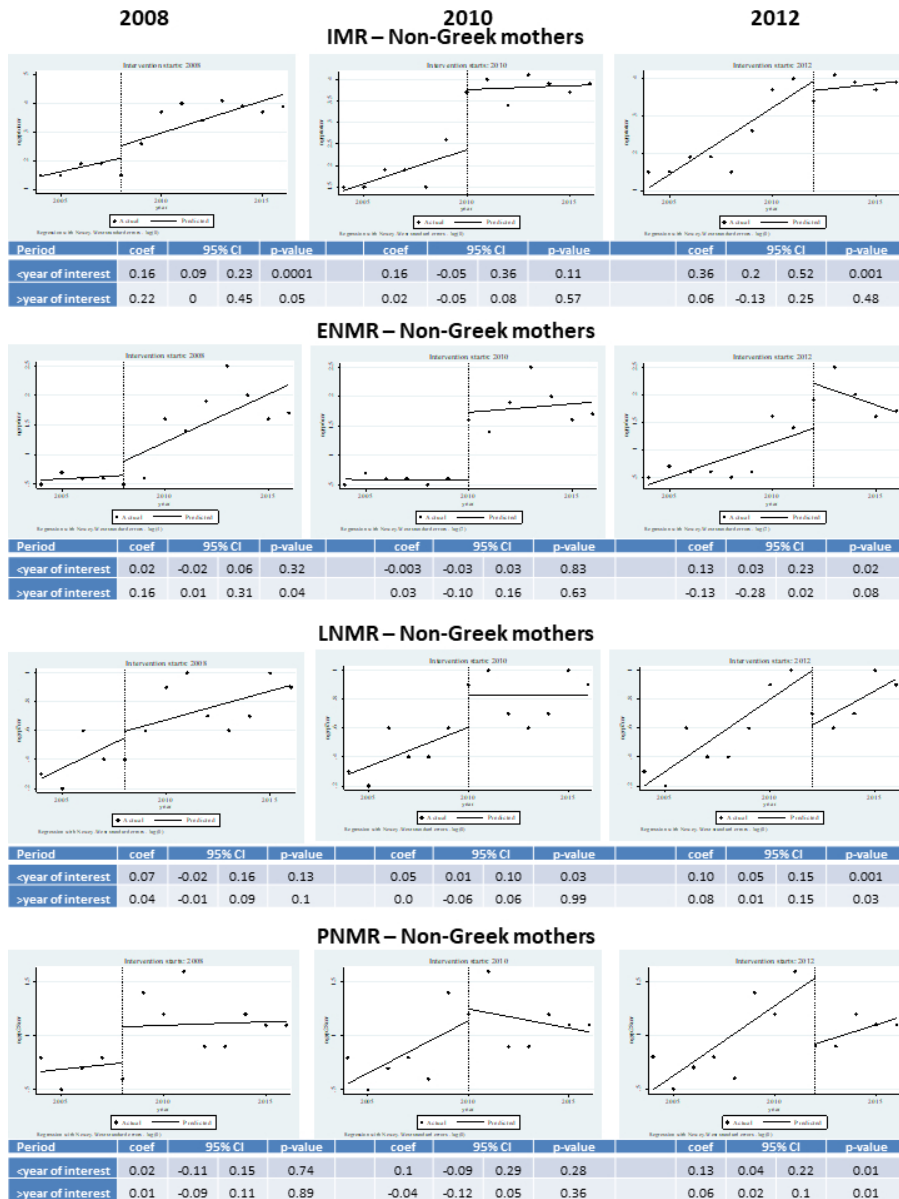

Interrupted Time Series analyses for evolution of infant (IMR), early (ENMR), late (LNMR) and post neonatal mortality rates (PNMR) by maternal nationality in alternative years of interest (2008, 2010 and 2012) in infants born to Non-Greek mothers.

190x254mm (96 x 96 DPI)

## Research checklist- STROBE Statement—checklist

|                           | Item No | Page number |
|---------------------------|---------|-------------|
| <b>Title and abstract</b> | 1       | 1           |
|                           |         | 3           |
| <b>Introduction</b>       |         |             |
| Background/rationale      | 2       | 6-7         |
| Objectives                | 3       | 7           |
| <b>Methods</b>            |         |             |
| Study design              | 4       | 7-8         |
| Setting                   | 5       | 7-8         |
| Participants              | 6       | 7-8         |
| Variables                 | 7       | 7-8         |
| Data sources/ measurement | 8*      | 7-8         |
| Bias                      | 9       | N/A         |
| Study size                | 10      | N/A         |
| Quantitative variables    | 11      | 7-8         |
| Statistical methods       | 12      | 8-9         |
| <b>Results</b>            |         |             |
| Participants              | 13*     | 9-10        |
| Descriptive data          | 14*     | 9-10        |
| Outcome data              | 15*     | 10=11       |
| Main results              | 16      | 10-11       |
| Other analyses            | 17      | N/A         |
| <b>Discussion</b>         |         |             |
| Key results               | 18      | 11          |
| Limitations               | 19      | 12          |
| Interpretation            | 20      | 12-14       |
| Generalisability          | 21      | 15          |
| <b>Other information</b>  |         |             |
| Funding                   | 22      | 21          |



# BMJ Open

## Disparities of infant and neonatal mortality trends in Greece during the years of economic crisis by ethnicity, place of residence and human development index: a nationwide population study

|                                 |                                                                                                                                                                                                                                                                                                                                                                                                                                                                                                                                                                                                                                                                                                                                                                                                                                                                                                                                                                                                                                               |
|---------------------------------|-----------------------------------------------------------------------------------------------------------------------------------------------------------------------------------------------------------------------------------------------------------------------------------------------------------------------------------------------------------------------------------------------------------------------------------------------------------------------------------------------------------------------------------------------------------------------------------------------------------------------------------------------------------------------------------------------------------------------------------------------------------------------------------------------------------------------------------------------------------------------------------------------------------------------------------------------------------------------------------------------------------------------------------------------|
| Journal:                        | <i>BMJ Open</i>                                                                                                                                                                                                                                                                                                                                                                                                                                                                                                                                                                                                                                                                                                                                                                                                                                                                                                                                                                                                                               |
| Manuscript ID                   | bmjopen-2018-025287.R1                                                                                                                                                                                                                                                                                                                                                                                                                                                                                                                                                                                                                                                                                                                                                                                                                                                                                                                                                                                                                        |
| Article Type:                   | Research                                                                                                                                                                                                                                                                                                                                                                                                                                                                                                                                                                                                                                                                                                                                                                                                                                                                                                                                                                                                                                      |
| Date Submitted by the Author:   | 19-Oct-2018                                                                                                                                                                                                                                                                                                                                                                                                                                                                                                                                                                                                                                                                                                                                                                                                                                                                                                                                                                                                                                   |
| Complete List of Authors:       | Siahanidou, Tania; First Department of Pediatrics, National and Kapodistrian University of Athens, School of Medicine<br>Dessypris, Nick; Department of Hygiene, Epidemiology and Medical Statistics, School of Medicine, National & Kapodistrian University of Athens<br>Analitis, Antonis; Department of Hygiene, Epidemiology and Medical Statistics, School of Medicine, National & Kapodistrian University of Athens<br>Mihas, Constantinos; Department of Hygiene, Epidemiology and Medical Statistics, School of Medicine, National and Kapodistrian University of Athens<br>Evangelou, Evangelos; Dept of Hygiene and Epidemiology; Department of Epidemiology and Biostatistics, Imperial College<br>Chrousos, George; First Department of Pediatrics, National and Kapodistrian University of Athens, School of Medicine<br>PETRIDOU, ELENI; Department of Hygiene, Epidemiology and Medical Statistics, School of Medicine, National & Kapodistrian University of Athens; Clinical Epidemiology Unit, Karolinska Institute, 171 77 |
| <b>Primary Subject Heading</b>: | Paediatrics                                                                                                                                                                                                                                                                                                                                                                                                                                                                                                                                                                                                                                                                                                                                                                                                                                                                                                                                                                                                                                   |
| Secondary Subject Heading:      | Epidemiology, Public health, Health policy, Global health                                                                                                                                                                                                                                                                                                                                                                                                                                                                                                                                                                                                                                                                                                                                                                                                                                                                                                                                                                                     |
| Keywords:                       | Neonates, Mortality rates, Infant deaths, perinatal care, financial crisis                                                                                                                                                                                                                                                                                                                                                                                                                                                                                                                                                                                                                                                                                                                                                                                                                                                                                                                                                                    |
|                                 |                                                                                                                                                                                                                                                                                                                                                                                                                                                                                                                                                                                                                                                                                                                                                                                                                                                                                                                                                                                                                                               |

SCHOLARONE™  
Manuscripts

1  
2 **Disparities of infant and neonatal mortality trends in Greece during the years of economic**  
3 **crisis by ethnicity, place of residence and human development index: a nationwide population**  
4 **study**  
5  
6  
7  
8  
9

10  
11  
12 Tania Siahnidou, Nick Dessypris, Antonis Analitis, Constantinos Mihas, Evangelos Evangelou,  
13  
14 George Chrousos, Eleni Th Petridou  
15

16  
17  
18  
19 First Department of Pediatrics, School of Medicine, National and Kapodistrian University of  
20  
21 Athens, 11527 Athens, Greece  
22  
23

24 Tania Siahnidou

25  
26 Associate Professor in Pediatrics-Neonatology  
27

28  
29  
30 Department of Hygiene, Epidemiology and Medical Statistics, School of Medicine, National and  
31  
32 Kapodistrian University of Athens, 11527 Athens, Greece  
33  
34

35 Nick Dessypris

36  
37 Research Associate  
38

39  
40  
41 Department of Hygiene, Epidemiology and Medical Statistics, School of Medicine, National and  
42  
43 Kapodistrian University of Athens, 11527 Athens, Greece  
44  
45

46 Antonis Analitis

47  
48 Research Associate  
49

50  
51  
52 Department of Hygiene, Epidemiology and Medical Statistics, School of Medicine, National and  
53  
54 Kapodistrian University of Athens, 11527 Athens, Greece  
55  
56

57 Constantinos Mihas  
58  
59  
60

1  
2 MD General Medicine, Research Associate  
3

4  
5  
6 Department of Hygiene and Epidemiology, University of Ioannina Medical School, Ioannina,  
7  
8 Greece and Department of Epidemiology and Biostatistics, Imperial College London, London, UK  
9

10 Evangelos Evangelou

11  
12 Assistant Professor of Clinical and Molecular Epidemiology

13  
14  
15  
16 First Department of Pediatrics, School of Medicine, National and Kapodistrian University of  
17  
18 Athens, 11527 Athens, Greece

19 George Chrousos

20  
21 Professor of Pediatrics

22  
23  
24  
25  
26  
27 Department of Hygiene, Epidemiology and Medical Statistics, School of Medicine, National and  
28  
29 Kapodistrian University of Athens, Athens 11527, Greece & Clinical Epidemiology Unit,  
30  
31 Karolinska Institute, 171 77, Stockholm, Sweden

32  
33  
34 Eleni Th Petridou

35  
36  
37 Professor of Preventive Medicine & Epidemiology  
38  
39  
40  
41

42 **Correspondence to:** Tania Siahnidou; [siahan@med.uoa.gr](mailto:siahan@med.uoa.gr)  
43  
44  
45  
46  
47  
48  
49  
50  
51  
52  
53  
54  
55  
56  
57  
58  
59  
60

**ABSTRACT****OBJECTIVE**

To study trends of infant (IMR) and neonatal mortality rate in Greece during the period 2004-2016 and explore the role of sociodemographic factors in the years of crisis

**DESIGN**

Nationwide individual data for livebirths and infant (0-11 months) deaths provided by the Hellenic Statistical Authority (ELSTAT) were examined using Poisson regression, joinpoint regression and Interrupted Time Series (ITS) statistical analyses.

**SETTING**

Greece

**PARTICIPANTS**

All infant deaths (n=4862) over the 13-year period, of which 87.2% were born to Greek mothers, and respective livebirths.

**MAIN OUTCOME MEASURES**

Evolution of IMR (0-364 days), early (<7 days, ENMR)/late (7-27 days, LNMR) neonatal and post neonatal (28-364 days, PNMR) mortality trends, by maternal nationality, place of residence and Human Development Index (HDI).

**RESULTS**

Overall, during the study-period among infants of Greek mothers, IMR -particularly PNMR- declined significantly (-0.9%, -1.6% annually, respectively), albeit differentially by place of residence (max=IMR<sub>urban</sub>: -4.1%, max=ENMR<sub>rural</sub>: +24.1%). By contrast, among infants of non-Greek mothers, the low starting IMR/ENMR/LNMR/PNMR increased significantly (max ENMR: +12.5%) leading to an erroneously, non-statistically significant, positive time-trend pattern

1  
2 overall in Greece. The inverse associations of HDI with IMR, ENMR and PNMR were restricted to  
3  
4 Greek mothers' infants. Of note, joinpoint regression analyses among Greek infants indicated  
5  
6 sizeable, borderline significant increases of IMR following the crisis (+9.3%, 2012-2016,  $p=0.07$ ),  
7  
8 mainly ENMR (+10.2%, 2011-2016,  $p=0.06$ ). By contrast, the high (+17.1%) IMR increases among  
9  
10 non-Greek infants were restricted to 2004-2011 and equalized to those of Greek mothers'  
11  
12 infants thereafter. ITS analyses in preset years (2008, 2010, 2012) overall confirmed the  
13  
14 joinpoint results and identified adverse trends in LNMR and PNMR after 2012 among Greek  
15  
16 infants.  
17  
18  
19  
20  
21

## 22 **CONCLUSIONS**

23  
24 HDI and rural residence were significantly associated with IMR. The strongly decreasing IMR -  
25  
26 especially ENMR- trends among Greeks were stagnated after a lag time of ~four years of crisis  
27  
28 approximating the previously sharply increasing trends among non-Greek infants.  
29  
30  
31  
32  
33  
34  
35  
36

## 37 **Strengths of this study**

- 38  
39 • Longest follow-up period of national data, as contrasted to previously Greek-based  
40  
41 studies.  
42  
43
- 44 • Maternal ethnicity is for first time considered in the analyses explaining part, if not most,  
45  
46 of the heterogeneity of trends through the study period.  
47  
48
- 49 • Three complimentary statistical methodologies were used to describe the overall  
50  
51 evolution of infant mortality and its components.  
52  
53

## 54 **Limitations**

- 55  
56 • Absence of a linkage system between birth and death data.  
57  
58  
59  
60

- Data on the role of biological factors or specific causes of infant death are missing.

**Abbreviations:**

IM; infant mortality

IMR; infant mortality rates

ENMR; early neonatal mortality rates

LNMR; late neonatal mortality rates

PNMR; post neonatal mortality rates

HDI; Human Development Index

ELSTAT; Hellenic Statistical Authority

ITS; Interrupted Time Series

## Introduction

Socioeconomic factors have repeatedly been recognized as strong determinants of the health status of the population, including infants.<sup>1-3</sup> Economic indicators, such as the *per capita* Gross National Product, were suggested to be at least as important contributors of infant mortality (IM) as narrowly defined factors relating to provision of medical care, e.g. the relative number of doctors or hospital beds in a community.<sup>1</sup> Not surprisingly, the recent economic crisis of ~2008, has been linked with declines in population and child health reflected also by increased IM rates (IMR).<sup>4,5</sup> It is worth noting that in European Union countries, even a minor 1% cut in government healthcare spending was associated with significant increases in all mortality metrics, including neonatal and post neonatal IM.<sup>6</sup>

On the contrary, associations between the crisis and increased mortality have been questioned in other studies showing that most indicators of population health, apart from those relevant to suicides and mental health, continued improving after crisis initiation.<sup>7-10</sup> Moreover, the economic crisis has been associated with some beneficial effects, i.e. decline in rates of road traffic accidents, and smoking cessation.<sup>4,9</sup> Reasonably, the impact of the crisis on health depends on several factors including the duration and intensity of the recession, the level of health care achieved prior to the recession and the type of austerity measures applied, but also on the type of the population studied with the most vulnerable groups being disproportionately affected.<sup>4,11,12</sup> Due to the latter, it was proposed that studies should focus on analyzing separately the subgroups most influenced by the crisis instead of presenting results as averages in a population.<sup>4</sup>

Greece has been markedly affected and still suffering the recent economic crisis. Between 2008 and 2016, the country's GDP *per capita* dropped by 26%, unemployment rate increased by more

1  
2  
3 than 200% (from 7.6% to 23.3%) and the median disposable income decreased by 35%.<sup>13,14</sup> The  
4  
5 GINI index, which measures income inequality, increased by 22% and the proportion of  
6  
7 individuals at risk of poverty or social exclusion climbed to almost 36% in 2016. Total health  
8  
9 expenditures and government expenditure on health care were both decreased by 34% per  
10  
11 capita over the period 2008-2016,<sup>13,14</sup> whereas unmet healthcare needs increased.<sup>15</sup> Besides,  
12  
13 during the last years, Greece experienced large refugee flows<sup>16,17</sup> with an anticipated negative  
14  
15 impact on the country's economy and population health indicators. Adverse effects of financial  
16  
17 crisis on perinatal factors, such as low birth weight, preterm birth and stillbirth rates, have been  
18  
19 also observed;<sup>18,19</sup> however, sparse data exist regarding the potential association of the crisis  
20  
21 with IMR. It has been initially reported that during the period 2003-2012, IMR in Greece did not  
22  
23 differ between the pre-crisis and crisis period whereas, a later study showed that IMR increased  
24  
25 between 2010 and 2015 as contrasted to the steady decrease observed during the preceding  
26  
27 decade.<sup>20,21</sup> Ecological correlations may prone, however, to fallacies, whereas the different parts  
28  
29 shaping the two main components of IM, namely neonatal (NM) and post neonatal mortality  
30  
31 (PNM), should have been distinctly examined along with other factors possibly influencing the  
32  
33 infants' health, especially socioeconomic status and access to health care delivery.  
34  
35  
36  
37  
38  
39  
40  
41 The aims of the current study were to explore time trends in early (<7 days of life) and late (7-27  
42  
43 days) neonatal, post neonatal (28-364 days) and total IM (0-364 days) in Greece during the  
44  
45 period 2004-2016 after taking into account nationality and place of residence, as well as  
46  
47 changes in the Human Development Index (HDI) during the study period as a proxy of individual  
48  
49 and collective measures of socioeconomic impact and health care access.  
50  
51  
52  
53  
54  
55

## 56 **Materials and Methods**

57  
58  
59  
60



1  
2  
3 Following personal contact and a signed agreement, individual data for all livebirths and infant  
4  
5 (0-11 months) deaths were provided by the Hellenic Statistical Authority (ELSTAT) for a 13-year  
6  
7 period (2004-2016) in two separate files: one including live births and a second one, infant  
8  
9 deaths; linkage of the two files was not possible as the personal identification number was not  
10  
11 available in ELSTAT. Information on maternal demographic characteristics, such as nationality  
12  
13 (available for years 2004-2016) and place of residence (available for years 2004-2014), as well as  
14  
15 on the infants' age of death, were also provided.  
16  
17

18  
19 Mortality rates were calculated for infant (IM), early neonatal (0-6 days) (ENM), late neonatal  
20  
21 (7-27 days) (LNM) and post neonatal (28-364 days) period (PNM) using respective numbers of  
22  
23 deaths over the number of livebirths per year. Annual percent of change (APC) during the study  
24  
25 period was initially estimated through Poisson regression analysis using the underlying  
26  
27 population of each set as an offset variable. Subsequently, data were stratified and analyzed by  
28  
29 maternal nationality (Greek vs. non-Greek) and place of residence (Urban/Semi-urban vs. Rural).  
30  
31 Joinpoint regression analysis<sup>22</sup> was thereafter applied to automatically derive, through an  
32  
33 algorithm, different segments in the mortality evolution curves overall, as well as those by  
34  
35 maternal nationality and place of residence. Interrupted Time Series (ITS) analyses were also  
36  
37 undertaken as a sensitivity analysis to further explore the effect of crisis on IMR and its  
38  
39 components in alternative prespecified years, notably 2008, considered to indicate the initiation  
40  
41 of the crisis in Greece as the value of the Gross Domestic Product of the country was maximum  
42  
43 at that year but dropped afterwards (Source: Aggregate National Accounts), and in two successive  
44  
45 periods two years apart (2010 and 2012), to control for possible time lags in observing the impact  
46  
47 of the crisis. All ITS models were verified and appropriately adjusted for possible auto-  
48  
49 correlation; autoregressive integrated moving-average models were used to control for  
50  
51  
52  
53  
54  
55  
56  
57  
58  
59  
60

1  
2 autocorrelation and to estimate treatment effects over multiple periods. In our ITS analysis a  
3 slope “<year of interest” is fitted until the introduction of the crisis, “>year of interest” represents  
4  
5 the change in the level of the mortality immediately following the initiation of the crisis and  
6  
7 “change of slope” represents the differences between pre and post crisis intervention slopes.  
8  
9

10  
11 Human development index (HDI) is a summary measure of average achievements of a country's  
12  
13 population in three areas including life expectancy, education and *per capita* income indicators.  
14  
15 Annual HDI values for the underlying populations in the year of death were extracted from the  
16  
17 United Nations Development Program website (<http://hdr.undp.org/en/composite/HDI>),  
18  
19 whereas Poisson regression analysis was used to explore the association of one standard  
20  
21 deviation of HDI with total IM and its components. All statistical analyses were performed using  
22  
23 the SAS software (V9.4, SAS Institute Inc.), Stata software program, version 13 (StataCorp. 2013.  
24  
25 Stata Statistical Software: Release 13. College Station, TX: StataCorp LP) and Joinpoint  
26  
27 Regression Program (Joinpoint Regression Program, Version 4.5.0.1 - June 2017; Statistical  
28  
29 Methodology and Applications Branch, Surveillance Research Program, National Cancer  
30  
31 Institute).  
32  
33  
34  
35  
36  
37  
38  
39  
40

#### 41 **Patient involvement**

42  
43 No patients were involved in setting the research question or the outcome measures, nor were  
44  
45 they involved in developing plans for design or implementation of the study. No patients were  
46  
47 asked to advise on interpretation or writing up of results. There are no plans to disseminate the  
48  
49 results of the research to study participants or the relevant patient community.  
50  
51  
52  
53  
54  
55

56 **Ethical approval:** Not required.  
57  
58  
59  
60

## Results

The annual average number of livebirths during the study period was 105077, ranging from a high 118302 (2008) to a low 91847 livebirths in 2015. The annual average proportion of Greek mothers was 83.7%, whereas the remaining were mainly economic migrants. During the period 2004-2016, a total of 4862 infant deaths were recorded of whom 4238 (87.2%) were of infants born to Greek mothers, whereas among the remaining 615 deaths of infants born to non-Greek mothers, 298 (48.5%) were of infants born to Albanian mothers, 146 (23.7%) of infants born to mothers from Balkan countries and countries of the former Soviet Union, 77 (12.5%) from Asia, 47 (7.6%) from countries of the European Union or other developed countries and 47 (7.6%) from Africa. During the early and late neonatal period, 2107 (43.3%) and 1136 (23.4%) deaths occurred, respectively, whereas another 1617 (33.3%) of deaths were recorded in the post neonatal period. The annual average IMR was 3.5 over 1000 livebirths, whereas the corresponding figures for the early, late and post neonatal period were 1.5‰, 0.8‰ and 1.2‰ respectively. The number of livebirths and infant deaths, as well as total IMR per 1000 livebirths in infants born to Greek and non-Greek mothers, in Greece, during the study period, are shown in Table 1.

Of note, in the beginning of the study period in 2004, notably well before the initiation of the crisis, IMR and its components were 2- to 4-fold higher among infants born to Greek mothers in comparison with rates in infants born to non-Greek origin mothers. During the subsequent 4-5 years, however, rates among Greeks followed downward trends whereas among non-Greeks inflated reaching almost similar values to those observed in infants born to Greek mothers (Figure 1).

1  
2 Overall, during the study-period, among infants born to Greek mothers, IMR, particularly PNMR,  
3 declined significantly (-0.9% and -1.6% annually, respectively,  $p=0.02$  for each), albeit  
4 differentially by place of residence (Table 2); significant decline of IMR trends (-3.5% annually,  
5  $p<0.0001$ ) and all its components was observed among infants born to Greek mothers living in  
6 urban areas (maximum decrease in ENMR: -4.1% annually,  $p<0.0001$ ) whereas, among infants  
7 born to Greek mothers in rural areas, a significant increase of IMR trend was observed (+5.2%  
8 annually,  $p=0.01$ ) resulting mainly from increased ENMR (+24.1% annually,  $p<0.0001$ ). By  
9 contrast, among infants of non-Greek mothers, the low starting IMR increased significantly by  
10 +9.4% annually ( $p<0.0001$ ), due to significant increases of ENMR, LNMR and PNMR (max ENMR:  
11 +12.5% annually,  $p<0.0001$ ) leading to an erroneously non-significant pattern of IMR evolution  
12 for Greece overall ( $p=0.50$ ). Inverse associations of HDI with IMR, ENMR and PNMR, restricted  
13 to Greek mothers' infants, were observed (Table 2).

14  
15 In order to examine whether IMR, in our study population, might have influenced by any  
16 variation in the registration of births in cases of uncertain viability, we analyzed separately the  
17 infant deaths in the first day of life; trends of IMR in this age group, over the study period, were  
18 non-significant (average annual percent change: -1.22%; 95% CI: -3.79% to 1.42%;  $p=0.36$ ).

19  
20 Results of joinpoint regression analyses were similar to those derived by the Poisson regression  
21 apart from models displayed in Table 3 pertaining to IMR and ENMR trends. Specifically, a  
22 break was identified among Greek infants restricting the decreasing IMR trend to the period  
23 2004-2012 (-4.5% annually,  $p=0.01$ ); this was mainly due to a significant decline in ENMR trend  
24 till 2011 (-6.5% annually,  $p=0.02$ ). Of note, however, in the most recent study period (2012-  
25 2016) sizeable, borderline significant, increases of IMR (+9.3% annually,  $p=0.07$ ) and ENMR  
26 (+10.2% annually,  $p=0.06$ ) were observed with no indication any more of differentiation by

1  
2 place of residence. By contrast, among infants born to non-Greek mothers, the high IMR  
3  
4 increases (+17.1% annually,  $p=0.002$ ) were restricted to the period 2004-2011 with no  
5  
6 fluctuation thereafter; finally, IMR approximated those of Greek mothers' infants (Table 3).  
7  
8

9  
10 ITS analyses in the preset years 2008, 2010 and 2012 (Figures 2 and 3) confirmed the joinpoint  
11  
12 analysis results and further identified adverse trends in LNMR and PNMR after 2012 among  
13  
14 Greek infants (Figure 2).  
15

## 16 17 18 19 **Discussion**

20  
21 Trends of neonatal and infant mortality in Greece, spanning from year 2004 -before the  
22  
23 initiation of crisis in 2008- to year 2016, are not homogeneous, given significant increases in the  
24  
25 relatively small proportion of infants born to non-Greek nationality mothers as contrasted to  
26  
27 declining IMR trends among Greek infants, and increases in indices indicating differentials in  
28  
29 proxies of health care access among Greek neonates, such as ENMR, noted ~four years after the  
30  
31 crisis, which led to offsets of the urbanization differentials observed overall. Specifically, the  
32  
33 "brake" of 2012 identified borderline increases of ~10% annually, thereafter, in IMR and ENMR  
34  
35 trends among infants born to Greek mothers. Changes in HDI during the study period were also  
36  
37 reflected in the inverse associations of HDI with ENMR and IMR, but also PNMR, among infants  
38  
39 born to Greek mothers.  
40  
41  
42  
43  
44  
45

46  
47 Strengths of the present investigation, as contrasted to previously Greek-based published  
48  
49 studies,<sup>9,18,20,21,23</sup> include the longest follow-up period of national data, namely since 2004,  
50  
51 before the crisis, when the first data on maternal ethnicity became electronically available, to  
52  
53 the latest available year 2016. Of great importance is also the fact that, for the first time, the  
54  
55 maternal ethnicity was considered in the analyses explaining part, if not most, of the  
56  
57  
58  
59

1  
2  
3 heterogeneity of trends through the study period. To this end, three complimentary statistical  
4  
5 methodologies were used to describe the overall evolution depicted in Figure 1. Thus, we were  
6  
7 able to enhance the validity of the results pertaining to the study of the evolution of individual  
8  
9 IMR components, namely ENMR, LNMR and PNMR, in association with socioeconomic factors  
10  
11 (i.e maternal nationality, place of residence and HDI) for which individual data have been  
12  
13 available on a nationwide level among both deaths and livebirths during the study period.  
14  
15 Calculation of IMR and its components was based on the number of livebirths; yet, the absence  
16  
17 of a linkage system between birth and death data, as well as other official registries in Greece,  
18  
19 has not allowed use of known determinants of socioeconomic deprivation or social coherence,  
20  
21 such as parental education, employment/occupation, marital status, family income and  
22  
23 household size. Neither were data on the role of biological factors, such as parental age,  
24  
25 gestational age and birthweight or multiplicity of pregnancy available for both the livebirths and  
26  
27 deaths series.<sup>5,19,24</sup> Besides, the study period, with available information on maternal nationality  
28  
29 and place of residence, was rather short leading to ITS analyses with few data points; ITS  
30  
31 analysis can be used even for few observations; no log-transformation is needed but the results  
32  
33 should be interpreted with caution as the power depends on various factors.<sup>25</sup> Lastly, analyses by  
34  
35 specific cause of infant death were not set among the outcome measures of this study.  
36  
37  
38  
39  
40  
41  
42  
43

44 Assessing migration as a determinant of perinatal health outcome and infant death in the  
45  
46 developed countries is a complex undertaking resulting in conflicting results of published  
47  
48 studies. Specifically, some studies, have shown that ethnic minority is a significant risk factor for  
49  
50 unfavorable perinatal outcomes and increased neonatal and infant mortality,<sup>18,26-33</sup> especially if  
51  
52 it coincides with a financial crisis, as was the case in Greece. Factors possibly contributing to the  
53  
54 increased risk for poorer outcomes among children born to migrants include socioeconomic  
55  
56  
57  
58  
59  
60

1  
2  
3 disadvantage, poor communication, discrimination, reduced utilization of health facilities, low  
4  
5 quality of care, but also stress and consanguinity or differing attitudes to screening and  
6  
7 termination of pregnancy associated with preterm birth, low birth weight or congenital  
8  
9 anomalies and lethal inherited diseases.<sup>26,30,34-36</sup> By contrast, other studies present similar or  
10  
11 even better perinatal health outcomes among some migrant groups than among natives  
12  
13 (“healthy migrant effect/paradox”).<sup>26-28,37,38</sup> Refugees have been recognized as the most  
14  
15 vulnerable group suffering increased severe neonatal morbidity and infant mortality risk,<sup>26,28</sup>  
16  
17 although no absolutely clear pattern regarding refugee or non-refugee status among migrants  
18  
19 has been identified.<sup>34</sup>

20  
21  
22  
23  
24 In our study, starting rates of IMR and its components among infants born to non-Greek  
25  
26 mothers were lower compared to those of Greek mothers. The numbers by individual maternal  
27  
28 nationality were, however, small to explore the tentative influence of the changing maternal  
29  
30 nationality case mix during the study period; this issue needs to be further followed-up by other  
31  
32 types of research methodology. Of note, the ratio of non-Greek infants among live births during  
33  
34 2009-2016 vs. 2004-2008 was only 1.32, whereas the respective figure among infant deaths was  
35  
36 almost 3-fold (data not shown). Indeed, a considerable proportion of non-Greek pregnant  
37  
38 women before the crisis were serving as home-aids in relatively affluent Greek families, as  
39  
40 contrasted to the adverse conditions envisaged by pregnant women and their offspring during  
41  
42 the most recent massive migration movements from deprived countries to European Union  
43  
44 member states via Greece which coincided with the crisis in our country. Actually, in the pre-  
45  
46 crisis era, non-Greek mothers of newborns comprised mainly economic migrants, most of them  
47  
48 of Albanian nationality living for many years, or even born, in Greece. After 2008, Greece  
49  
50 experienced an influx of refugees with the majority of them fleeing from war and terror in Syria,  
51  
52  
53  
54  
55  
56  
57  
58  
59

1  
2  
3 Occupied Palestinian Territory, but also from Afghanistan, Iraq and other countries.<sup>16,17</sup> It could  
4  
5 be suggested that changes in the homogeneity of foreign mothers during the study period, in  
6  
7 association with the country's economic difficulties, might have led from the "healthy migrant  
8  
9 effect", observed before 2008, to the deterioration of IM indicators and IMR trends, afterwards,  
10  
11 in infants born to non-Greek mothers.  
12  
13

14  
15 Simultaneously with immigration to/through Greece, the country experienced the third wave of  
16  
17 mass emigration in the 20<sup>th</sup> and 21<sup>st</sup> centuries; over 400,000 Greek citizens left Greece since the  
18  
19 onset of the economic crisis, in 2008, seeking new opportunities and employment in other  
20  
21 countries, mainly Germany, the United Kingdom and the Netherlands.<sup>39,40</sup> The current  
22  
23 emigration wave of Greeks involved mostly highly-educated people (the so called "brain-drain")  
24  
25 of young age, leading to a decrease in the number of Greek women of childbearing age.<sup>41</sup> This  
26  
27 fact, along with the decrease in the fertility rate by almost 10% between 2008 and 2016,  
28  
29 contributes significantly to the reduction in the annual number of livebirths in Greece by almost  
30  
31 23% during the period of the economic crisis.<sup>41,42</sup> Furthermore, the flow of mostly affluent and  
32  
33 well educated people going outside Greece might have also contributed, to a certain extent, to  
34  
35 the observed increases in IMR among Greek children following the crisis.  
36  
37  
38  
39  
40  
41

42  
43 The strongly decreasing IMR, especially ENMR, trends among Greek infants were stagnated  
44  
45 after a lag time of ~four years of crisis and equalized with the previously sharply increasing  
46  
47 trends among non-Greek maternal nationality infants; this time lag is reasonable<sup>43</sup> and in line  
48  
49 with previous findings showing that following reductions in the government healthcare  
50  
51 spending in Europe, the greatest negative effect on neonatal and post neonatal mortality was 4  
52  
53 and 5 years later, respectively.<sup>6</sup> The irony is that the period 2012-2016, during which the crisis  
54  
55 was deepening<sup>13,14</sup> and stricter economic austerity measures were applied,<sup>44</sup> disparities gap in  
56  
57  
58  
59  
60



1  
2  
3 IMR trends diminished against the Greek population; IMR trends deteriorated only in infants  
4  
5 born to Greek mothers, whereas in infants born to non-Greek mothers IMR trends approached  
6  
7 an anelastic highest value up to 2011 with no fluctuation thereafter. The importance of two sub-  
8  
9 analyses of IMR trends by maternal nationality (Greek vs. non-Greek) should be emphasized;  
10  
11 when trends in the entire study population were assessed, year 2008, considered the year of crisis  
12  
13 initiation, was misleadingly identified as a break in IMR and ENMR trends by joinpoint  
14  
15 regression analysis, in line with findings of previous relevant studies in Greece which did not  
16  
17 take into consideration the maternal nationality.<sup>20</sup>

21  
22 Disparities in IMR still exist across geographic areas even in well developed countries; i.e. IMR in  
23  
24 the United States vary by urbanization level of maternal residency being lowest in large urban  
25  
26 counties but highest in rural areas.<sup>45</sup> Rural women may face health challenges related to  
27  
28 geographic barriers to care (less timely and/or appropriate care) and physician shortages, but  
29  
30 they may also present differences in a number of socioeconomic and demographic risk factors,  
31  
32 such as less education, lower income, younger age at pregnancy, or greater number of children,  
33  
34 in comparison with their urban counterparts.<sup>46,47</sup> Disparities in IMR trends between urban/semi  
35  
36 urban and rural areas in Greece would not be surprising if changes in IMR trends were observed  
37  
38 in the same direction; the increasing IMR trends during the study period in infants born to  
39  
40 Greek mothers living in rural areas, as opposed to the declining IMR trends in those born to  
41  
42 Greek mothers living in urban/semi urban areas, is worrisome; specific causes should be further  
43  
44 studied and addressed. The increasing IMR trends in infants born to non-Greek mothers despite  
45  
46 living in urban areas can be explained by previous reports showing that other risk factors, i.e.  
47  
48 young maternal age (<20 years) or maternal ethnic minority, may be more powerful than place  
49  
50 of residence.<sup>47</sup>

1  
2  
3 As expected, among the three IMR components, ENMR was the most “sensitive” in reflecting  
4  
5 adverse impacts on child health as further reflected in the IMR trends. Specifically, ENMR was  
6  
7 overall positively associated with rural place of residence of Greek children, notably before the  
8  
9 “break” of 2012, with the increased ENMR neutralizing the urbanization differentials among  
10  
11 newborns of Greek mothers. ENMR, in developed countries, including Greece, represents more  
12  
13 than 70% of neonatal deaths on account mainly of prematurity/low birth weight and congenital  
14  
15 anomalies.<sup>14,48-51</sup> Actually, it reflects perinatal health and care during pregnancy and labor, and  
16  
17 also postnatal care in the first week of life.<sup>50</sup> Increased incidence of impaired perinatal  
18  
19 parameters including low birth weight, prematurity, and increased maternal age and rate of  
20  
21 caesarian section, have been reported during the years of the economic decline in Greece.<sup>18,19</sup>  
22  
23  
24  
25  
26  
27 Cuts in public health expenditures between 2008 and 2016, reduction in health care workforce  
28  
29 and pediatric nurses, as well as reduction in the number of obstetrics beds, obstetricians and  
30  
31 midwives (-45.5%, -60.2% and -27.5%, respectively)<sup>14</sup> could possibly explain, at least in part, the  
32  
33 observed increases in ENMR trends during the study period in Greece. Besides, it is worth  
34  
35 mentioning that IMR and ENMR are influenced by variation in the registration of births in case of  
36  
37 uncertain viability.<sup>52</sup> In Greece, like in other countries,<sup>53</sup> misclassification in reporting of  
38  
39 extremely preterm births of <24 weeks of gestation, as live or stillborn, may exist. Further  
40  
41 analysis of IMR trends after excluding extremely preterm births would be useful to minimize any  
42  
43 registration variation; however, as mentioned in the limitations of this study, gestational age data  
44  
45 of the study population are missing. To clarify this issue we analyzed separately the infant deaths  
46  
47 in the first day of life; trends of IMR in this age group, over the study period, were non-  
48  
49 significant (average annual percent change: -1.22%; 95% CI: -3.79% to 1.42%; p=0.36).  
50  
51  
52

53  
54  
55 The exact mechanisms leading to the disparities in trends of neonatal and infant mortality  
56  
57 observed in this study remain to be further explored. Specific maternal, family and infant  
58  
59

1  
2 features, including detailed and punctual information on the causes of infant deaths, would  
3  
4 have shed more light on the links between IMR trends and socioeconomic factors but were  
5  
6 beyond the scope of this article and left for future research. Meanwhile, policies and programs  
7  
8 should be implemented to mitigate the negative impact of the crisis on population and infant  
9  
10 health in Greece. Vulnerable groups, such as mothers of non-Greek nationality, of low income,  
11  
12 or rural place of residence, should be specifically addressed and their rights to health protected.  
13  
14 Barriers in the access of refugees to the Greek health care system have been mostly related to  
15  
16 language, culture, and inadequate information about the healthcare system, but also include  
17  
18 difficulties in the coordination of Health Services, transportation problems, issues in obtaining  
19  
20 expertise medical assessment in the camps, lack of continuity of care, financial difficulties in  
21  
22 making out-of-pocket payments for health and social care services, and administrative barriers,  
23  
24 among others.<sup>54</sup> In response, the Greek government and several Non-Governmental  
25  
26 Organizations initiated commendable actions, i.e. National Health System services free of  
27  
28 charge for uninsured and vulnerable social groups including asylum seekers , translation services  
29  
30 in public hospitals, access to specialist care/treatment with Gynecologists (mostly women),  
31  
32 midwives, dentists, psychologists, and psychiatrists being lately included in the camp clinics;<sup>54</sup>  
33  
34 these actions may have prevented deterioration of IMR which are being kept at steady levels  
35  
36 after 2011 in infants of non-Greek mothers; efforts should be continued and intensified,  
37  
38 however, as to ensure equity with local populations. Strong governmental integration policy for  
39  
40 minorities paired with initiatives to improve social coherence, a deeply rooted mechanism for  
41  
42 protection of health among those in need in the Greek society, along with further  
43  
44 improvements in primary health care delivery could help to alleviate the cost in infant lives and  
45  
46 ensure healthy adulthood.<sup>32,51</sup> Irrespective of the crisis, improvements in the quality of perinatal  
47  
48  
49  
50  
51  
52  
53  
54  
55  
56  
57  
58  
59  
60

1  
2 and neonatal care, including centralization of very preterm deliveries, establishment of regional  
3  
4 perinatal centers, monitoring of the implementation of evidence-based practices in maternity  
5  
6 and neonatal units, as well as increase in health expenditures, health care workforce, number of  
7  
8 doctors and midwives/nurses, could decrease ENMR, eventually leading to overall decrease in  
9  
10  
11  
12 IMR in Greece.<sup>50</sup>  
13  
14  
15  
16  
17  
18  
19

## 20 REFERENCES

- 21  
22 1. Petridou E, Valadian I, Trichopoulos D, Tzonou A, Kyriopoulos Y, Matsaniotis N. Medical  
23  
24 services and socioeconomic factors: Determinants of infant mortality in Greece. *Hygie*  
25  
26 1989;3:20-3.  
27  
28  
29 2. WHO. The determinants of health. <http://www.who.int/hia/evidence/doh/en> (Date of access:  
30  
31 30/5/2018)  
32  
33  
34 3. Zylbersztejn A, Gilbert R, Hjern A, Wijlaars L, Hardelid P. Child mortality in England compared  
35  
36 with Sweden: a birthcohort study. *Lancet* 2018;391(10134):2008-2018. doi:10.1016/S0140-  
37  
38 6736(18)30670-6.  
39  
40  
41 4. Rajmil L, Fernandez de Sanmamed MJ, Choonara I, et al; International Network for Research  
42  
43 in Inequalities in Child Health (INRICH). Impact of the 2008 economic and financial crisis on child  
44  
45 health: a systematic review. *Int J Environ Res Public Health* 2014;11:6528-46.  
46  
47 doi:10.3390/ijerph110606528.  
48  
49  
50 5. Glonti K, Gordeev VS, Goryakin Y, Reeves A, Stuckler D, McKee M, Roberts B. A systematic  
51  
52 review on health resilience to economic crises. *PLoS One* 2015;10:e0123117.  
53  
54  
55  
56 doi:10.1371/journal.pone.0123117.  
57  
58  
59  
60

- 1  
2  
3 6. Budhdeo S, Watkins J, Atun R, Williams C, Zeltner T, Maruthappu M. Changes in government  
4  
5 spending on healthcare and population mortality in the European union, 1995–2010: a cross-  
6  
7 sectional ecological study. *J R Soc Med* 2015;108:490-8. doi:10.1177/0141076815600907.  
8
- 9  
10 7. Tapia Granados JA, Rodriguez JM. Health, economic crisis, and austerity: A comparison of  
11  
12 Greece, Finland and Iceland. *Health Policy* 2015;119:941-53.  
13  
14 doi:10.1016/j.healthpol.2015.04.009.  
15
- 16  
17 8. Regidor E, Barrio G, Bravo MJ, de la Fuente L. Has health in Spain been declining since the  
18  
19 economic crisis? *J Epidemiol Community Health* 2014;68:280-2. doi:10.1136/jech-2013-202944.  
20
- 21  
22 9. Laliotis I, Ioannidis JPA, Stavropoulou C. Total and cause-specific mortality before and after  
23  
24 the onset of the Greek economic crisis: an interrupted time-series analysis. *Lancet Public Health*  
25  
26 2016;1: e56–e65. doi:10.1016/S2468-2667(16)30018-4.  
27
- 28  
29 10. Parmar D, Stavropoulou C, Ioannidis JP. Health outcomes during the 2008 financial crisis in  
30  
31 Europe: systematic literature review. *BMJ* 2016;354:i4588. doi:10.1136/bmj.i4588.  
32
- 33  
34 11. O'Donnell C, Burns N, Dowrick C, Lionis C, MacFarlane A; RESTORE team. Health-care access  
35  
36 for migrants in Europe. *Lancet* 2013; 382:393. doi: 10.1016/S0140-6736(13)61666-9.  
37
- 38  
39 12. Karanikolos M, Heino P, McKee M, Stuckler D, Legido-Quigley H. Effects of the Global  
40  
41 Financial Crisis on Health in High-Income OECD Countries: A Narrative Review. *Int J Health Serv*  
42  
43 2016;46:208-40. doi: 10.1177/0020731416637160.  
44
- 45  
46 13. Organisation for Economic Co-operation and Development OECD data.  
47  
48 <https://data.oecd.org> (Date of access: 30/5/2018) (2016).  
49
- 50  
51 14. Hellenic Statistical Authority *Statistics*. [www.statistics.gr](http://www.statistics.gr) (Date of access: 30/5/2018) (2016).  
52  
53  
54  
55  
56  
57  
58  
59  
60

- 1  
2  
3 15. Zavras D, Zavras AI, Kyriopoulos II, Kyriopoulos J. Economic crisis, austerity and unmet  
4 healthcare needs: the case of Greece. *BMC Health Serv Res* 2016;16:309. doi:10.1186/s12913-  
5 016-1557-5.  
6  
7  
8  
9  
10 16. European Union. The EU and the migration crisis, July 2017, <http://publications.europa.eu>  
11  
12 17. Mertens E, Rockenschaub G, Economopoulou A, Kreidl P. Assessment of public health issues  
13 of migrants at the Greek-Turkish border, April 2011. *Euro Surveill* 2012 Jan 12;17(2). pii: 20056.  
14  
15 18. Zografaki I, Papamichail D, Panagiotopoulos T. Adverse effect of the financial crisis in Greece  
16 on perinatal factors. *Eur J Public Health* 2018 [Epub ahead of print]. doi:  
17 10.1093/eurpub/cky078.  
18  
19 19. Sdoná E, Papamichail D, Ragkou E, Briana DD, Malamitsi-Puchner A, Panagiotopoulos T.  
20 Greek economic crisis and impaired perinatal parameters: experience from a public maternity  
21 hospital. *J Matern Fetal Neonatal Med* 2018;31:2371-5. doi:10.1080/14767058.2017.1342803.  
22  
23 20. Michas G, Varytimiadi A, Chasiotis I, Micha R. Maternal and child mortality in Greece. *Lancet*  
24 2014;383:691-2. doi:10.1016/S0140-6736(14)60251-8.  
25  
26 21. Filippidis F, Gerovasili V, Millett C, Tountas Y. Medium-term impact of the economic crisis on  
27 mortality, health-related behaviours and access to healthcare in Greece. *Sci Rep* 2017;7:46423.  
28 doi:10.1038/srep46423.  
29  
30 22. Kim HJ, Fay MP, Feuer EJ, Midthune DN. Permutation tests for joinpoint regression with  
31 applications to cancer rates. *Stat Med* 2000;19:335-51. PMID:10649300  
32  
33 23. Simou E, Koutsogeorgou E. Effects of the economic crisis on health and healthcare in Greece  
34 in the literature from 2009 to 2013: a systematic review. *Health Policy* 2014;115:111-9. doi:  
35 10.1016/j.healthpol.2014.02.002.  
36  
37  
38  
39  
40  
41  
42  
43  
44  
45  
46  
47  
48  
49  
50  
51  
52  
53  
54  
55  
56  
57  
58  
59  
60

- 1  
2  
3 24. Petridou ET, Georgakis MK, Erdmann F, et al. Advanced parental age as risk factor for  
4 childhood acute lymphoblastic leukemia: results from studies of the Childhood Leukemia  
5 International Consortium. *Eur J Epidemiol* 2018. doi:10.1007/s10654-018-0402-z. [Epub ahead  
6 of print].  
7  
8  
9  
10  
11  
12 25. Bernal JL, Cummins S, Gasparrini A. Interrupted time series regression for the evaluation of  
13 public health interventions: a tutorial. *Int J Epidemiol* 2017;46(1):348-55. doi:  
14 10.1093/ije/dyw098.  
15  
16  
17  
18  
19 26. Gissler M, Alexander S, MacFarlane A, et al. Stillbirths and infant deaths among migrants in  
20 industrialized countries. *Acta Obstet Gynecol Scand* 2009;88:134-48.  
21 doi:10.1080/00016340802603805.  
22  
23  
24  
25  
26  
27 27. Gagnon AJ, Zimbeck M, Zeitlin J, et al. Migration to western industrialized countries and  
28 perinatal health: a systematic review. *Soc Sci Med* 2009;69:934-46.  
29 doi:10.1016/j.socscimed.2009.06.027.  
30  
31  
32  
33  
34 28. Wanigaratne S, Cole DC, Bassil K, et al. Severe Neonatal Morbidity Among Births to Refugee  
35 Women. *Matern Child Health J* 2016;20:2189-98. doi:10.1007/s10995-016-2047-4.  
36  
37  
38  
39 29. Puthussery S. Perinatal outcomes among migrant mothers in the United Kingdom: Is it a  
40 matter of biology, behaviour, policy, social determinants or access to health care? *Best Pract*  
41 *Res Clin Obstet Gynaecol* 2016;32:39-49. doi:10.1016/j.bpobgyn.2015.09.003.  
42  
43  
44  
45  
46 30. Wanner P, Bollini P. The contribution of the foreign population to the high level of infant  
47 mortality in Switzerland: a demographic analysis. *BMC Pregnancy Childbirth* 2017;17:151.  
48 doi:10.1186/s12884-017-1332-6.  
49  
50  
51  
52  
53  
54  
55  
56  
57  
58  
59  
60

- 1  
2  
3 31. Cantarutti A, Franchi M, Monzio Compagnoni M, Merlino L, Corrao G. Mother's education  
4 and the risk of several neonatal outcomes: an evidence from an Italian population-based study.  
5 *BMC Pregnancy Childbirth* 2017;17:221. doi:10.1186/s12884-017-1418-1.  
6  
7  
8  
9  
10 32. Bollini P, Pampallona S, Wanner P, Kupelnick B. Pregnancy outcome of migrant women and  
11 integration policy: a systematic review of the international literature. *Soc Sci Med* 2009;68:452-  
12  
13  
14  
15 61. doi:10.1016/j.socscimed.2008.10.018.  
16  
17 33. Gotsens M, Malmusi D, Villarroel N, et al. Health inequality between immigrants and natives  
18 in Spain: the loss of the healthy immigrant effect in times of economic crisis. *Eur J Public Health*  
19  
20  
21  
22 2015;25:923-9. doi:10.1093/eurpub/ckv126.  
23  
24 34. Nybo Andersen AM, Gundlund A, Villadsen SF. Stillbirth and congenital anomalies in  
25 migrants in Europe. *Best Pract Res Clin Obstet Gynaecol* 2016;32:50-9.  
26  
27  
28  
29  
30  
31  
32 35. Di Renzo GC, Tosto V, Giardina I. The biological basis and prevention of preterm birth. *Best*  
33  
34  
35  
36  
37 36. Wanigaratne S, Cole DC, Bassil K, Hyman I, Moineddin R, Urquia ML. The influence of  
38  
39  
40  
41  
42  
43  
44  
45  
46  
47  
48  
49  
50  
51  
52  
53  
54  
55  
56  
57  
58  
59  
60
37. Kirby RS. Perinatal outcomes and nativity: does place of birth really influence infant health?  
*Birth* 2011;38:354-6. doi:10.1111/j.1523-536X.2011.00505.x.
38. Sdoná E, Papamichail D, Ragkou E, et al. Migration status and perinatal parameters in a  
Greek public maternity hospital: an illustration of the "healthy immigrant effect". *J Matern Fetal  
Neonatal Med* 2017. doi: 10.1080/14767058.2017.1371131. [Epub ahead of print].



- 1  
2  
3 39. Eurostat, "Emigration by age group, sex and citizenship".  
4  
5 [http://appsso.eurostat.ec.europa.eu/nui/show.do?dataset=migr\\_emi1ctz&lang=en](http://appsso.eurostat.ec.europa.eu/nui/show.do?dataset=migr_emi1ctz&lang=en) (last  
6  
7 updated: 04/04/2018).  
8  
9  
10 40. Cavounidis J. The changing face of emigration: Harnessing the potential of the New Greek  
11  
12 Diaspora. Washington, DC: Migration Policy Institute, 2015.  
13  
14 41. Vrachnis N, Vlachadis N, Iliodromiti Z, Vlachadi M, Creatsas G. Greece's birth rates and the  
15  
16 economic crisis. *Lancet* 2014;383:692-3. doi: 10.1016/S0140-6736(14)60252-X.  
17  
18 42. Eurostat, "Fertility indicators". [http://appsso.eurostat.ec.europa.eu/nui/show.](http://appsso.eurostat.ec.europa.eu/nui/show.do?dataset=demo_find&lang=en)  
19  
20 [do?dataset=demo\\_find&lang=en](http://appsso.eurostat.ec.europa.eu/nui/show.do?dataset=demo_find&lang=en) (last updated: 20/09/2018)  
21  
22  
23 43. Karanikolos M, Mladovsky P, Cylus J, et al. Financial crisis, austerity, and health in Europe.  
24  
25 *Lancet* 2013;381:1323-31. doi:10.1016/S0140-6736(13)60102-6.  
26  
27  
28 44. Burki T. Health under austerity in Greece. *Lancet* 2018;391:525-6. doi:10.1016/S0140-  
29  
30 6736(18)30242-3.  
31  
32  
33 45. Ely DM, Driscoll AK, Mathews TJ. Infant mortality rates in rural and urban areas in the United  
34  
35 States, 2014. *NCHS data brief*, No 285. Hyattsville, MD: National Center for Health Statistics,  
36  
37 2017.  
38  
39  
40 46. Van de Poel E, O'Donnell O, Van Doorslaer E. What explains the rural-urban gap in infant  
41  
42 mortality: household or community characteristics? *Demography* 2009;46:827-50.  
43  
44 doi:org/10.1353/dem.0.0074.  
45  
46  
47 47. Harris DE, Aboueissa AM, Baugh N, Sarton C. Impact of rurality on maternal and infant  
48  
49 health indicators and outcomes in Maine. *Rural Remote Health* 2015;15:3278.  
50  
51  
52 48. Heron M. Deaths: Leading Causes for 2015. *Natl Vital Stat Rep* 2017;66:1-76.  
53  
54  
55  
56  
57  
58  
59  
60

- 1  
2  
3 49. Roncancio CP, Misnaza SP, Peña IC, Prieto FE, Cannon MJ, Valencia D. Trends and  
4 characteristics of fetal and neonatal mortality due to congenital anomalies, Colombia 1999-  
5 2008. *J Matern Fetal Neonatal Med* 2018;31:1748-55. doi:10.1080/14767058.2017.1326901.  
6  
7  
8  
9  
10 50. Lehtonen L, Gimeno A, Parra-Llorca A, Vento M. Early neonatal death: A challenge  
11 worldwide. *Semin Fetal Neonatal Med* 2017;22:153-60. doi:10.1016/j.siny.2017.02.006.  
12  
13  
14 51. Alexander M, Harding M, Lamarche C. Quantifying the impact of economic crises on infant  
15 mortality in advanced economies. *Applied Economics* 2011; 43: 3313–23.  
16 doi:10.1080/00036840903559620.  
17  
18  
19  
20 52. Smith L, Draper ES, Manktelow BN, Pritchard C, Field DJ. Comparing regional infant death  
21 rates: the influence of preterm births <24 weeks of gestation. *Arch Dis Child Fetal Neonatal Ed*  
22 2013;98:F103-7. doi:10.1136/fetalneonatal-2011-301359  
23  
24  
25  
26 53. Smith LK, Blondel B, Van Reempts P, et al. Variability in the management and outcomes of  
27 extremely preterm births across five European countries: a population-based cohort study. *Arch*  
28 *Dis Child Fetal Neonatal Ed* 2017;102:F400-8. doi: 10.1136/archdischild-2016-312100.  
29  
30  
31  
32 54. Kotsiou OS, Kotsios P, Srivastava DS, Kotsios V, Gourgoulialis KI, Exadaktylos AK. Impact of  
33 the Refugee Crisis on the Greek Healthcare System: A Long Road to Ithaca. *Int J Environ Res*  
34 *Public Health* 2018;15(8). pii:E1790. doi: 10.3390/ijerph15081790.  
35  
36  
37  
38  
39  
40  
41  
42  
43  
44  
45  
46  
47  
48

49 **Contributors:** EP and GC were involved in the initial conception of the study. All authors  
50 contributed to the design, analysis and interpretation of data. TS, ND and EP developed the first  
51 draft of the manuscript and all authors critically revised it and approved the final version. ND,  
52 AA and CM performed the statistical analyses; EE reviewed statistics and contributed  
53  
54  
55  
56  
57  
58  
59  
60

1  
2 significantly for ITS analyses. All authors agree to be accountable for all aspects of the work in  
3  
4 ensuring that questions related to the accuracy or integrity of any part of the work are  
5  
6 appropriately investigated and resolved. The corresponding author ensures that all the journal's  
7  
8 administrative requirements are properly completed.  
9  
10  
11  
12  
13  
14

15 **Acknowledgements:** ELSTAT has provided individual anonymized data.  
16  
17  
18  
19

20 **Data sharing:** No additional data available.  
21  
22  
23  
24

### 25 **Funding Statement**

26  
27 This research received no specific grant from any funding agency in the public, commercial or  
28  
29 not-for-profit sectors'  
30  
31  
32  
33  
34

### 35 **Competing interests statement**

36  
37 All authors have completed the ICMJE uniform disclosure form at  
38  
39 [www.icmje.org/coi\\_disclosure.pdf](http://www.icmje.org/coi_disclosure.pdf) and declare: no support from any organization for the  
40  
41 submitted work; no financial relationships with any organizations that might have an interest in  
42  
43 the submitted work in the previous three years; no other relationships or activities that could  
44  
45 appear to have influenced the submitted work.  
46  
47  
48  
49  
50  
51  
52  
53  
54  
55  
56  
57  
58  
59  
60

## Figure Legends

**Figure 1.** Evolution of Infant Early, Late and Post Neonatal Mortality Rates in Greece (2004-2016) overall and by maternal nationality

**Figure 2.** Interrupted Time Series analyses for evolution of infant (IMR), early (ENMR), late (LNMR) and post neonatal mortality rates (PNMR) in alternative prespecified years of interest (2008, 2010 and 2012) in infants born to Greek mothers.

**Figure 3.** Interrupted Time Series analyses for evolution of infant (IMR), early (ENMR), late (LNMR) and post neonatal mortality rates (PNMR) in alternative prespecified years of interest (2008, 2010 and 2012) in infants born to non-Greek mothers.

**Table 1.** Livebirths, infant deaths and total infant mortality rates (IMR) per 1000 livebirths in infants born to Greek and non-Greek mothers in Greece during the period 2004-2016

| Year | Infants born to Greek mothers |                   |                                 | Infants born to non-Greek mothers |                   |                                 |
|------|-------------------------------|-------------------|---------------------------------|-----------------------------------|-------------------|---------------------------------|
|      | Livebirths (N)                | Infant deaths (N) | Mortality Rates/1000 livebirths | Livebirths (N)                    | Infant deaths (N) | Mortality Rates/1000 livebirths |
| 2004 | 88805                         | 403               | 4.5                             | 16825                             | 26                | 1.5                             |
| 2005 | 89819                         | 383               | 4.3                             | 17678                             | 26                | 1.5                             |
| 2006 | 92590                         | 379               | 4.1                             | 19396                             | 36                | 1.9                             |
| 2007 | 91462                         | 359               | 3.9                             | 20412                             | 38                | 1.9                             |
| 2008 | 96329                         | 281               | 2.9                             | 21931                             | 32                | 1.5                             |
| 2009 | 95640                         | 307               | 3.2                             | 22244                             | 58                | 2.6                             |
| 2010 | 93209                         | 355               | 3.8                             | 21351                             | 80                | 3.7                             |
| 2011 | 87445                         | 282               | 3.2                             | 18680                             | 74                | 4.0                             |
| 2012 | 84868                         | 241               | 2.8                             | 15153                             | 52                | 3.4                             |
| 2013 | 80938                         | 292               | 3.6                             | 13063                             | 53                | 4.1                             |
| 2014 | 79985                         | 298               | 3.7                             | 12144                             | 47                | 3.9                             |
| 2015 | 79919                         | 320               | 4.0                             | 11919                             | 44                | 3.7                             |
| 2016 | 80166                         | 338               | 4.2                             | 12721                             | 49                | 3.9                             |

\*excluding missing maternal nationality values

**Table 2.** Poisson regression derived changes and 95% Confidence Intervals (CI) of infant (IMR), early (ENMR), late (LNMR) and post neonatal mortality rates (PNMR) in time periods with available data: Annual Percent of Change (APC) for place of residence (2004-2014) and maternal nationality (2004-2016); Percept of Change (PC) for 1 Standard Deviation of Human Development Index (HDI, 2000-2015) controlling for year of birth.

| Variable             | IMR  |                           |                  | ENMR |                            |                  | LNMR |                          |              | PNMR |                            |              |
|----------------------|------|---------------------------|------------------|------|----------------------------|------------------|------|--------------------------|--------------|------|----------------------------|--------------|
|                      | N    | APC (95% CI)              | p-value          | N    | APC (95% CI)               | p-value          | N    | APC (95% CI)             | p-value      | N    | APC (95% CI)               | p-value      |
| Maternal nationality |      |                           |                  |      |                            |                  |      |                          |              |      |                            |              |
| Greek                | 4238 | <b>-0.9 (-1.7,-0.1)</b>   | <b>0.02</b>      | 1849 | -0.6 (-1.8,0.7)            | 0.35             | 995  | -0.6 (-2.3,1.1)          | 0.46         | 1393 | <b>-1.6 (-3.0,-0.2)</b>    | <b>0.02</b>  |
| Non-Greek            | 615  | <b>9.4 (6.9,11.9)</b>     | <b>&lt;.0001</b> | 258  | <b>12.5 (8.6,16.5)</b>     | <b>&lt;.0001</b> | 138  | <b>8.0 (3.1,13.2)</b>    | <b>0.001</b> | 218  | <b>4.4 (0.6,8.4)</b>       | <b>0.02</b>  |
| All*                 | 4862 | 0.3 (-0.5, 1.0)           | 0.50             | 2107 | 0.9 (-0.3,2.1)             | 0.13             | 1136 | 0.4 (-1.2,2.0)           | 0.65         | 1617 | -0.9 (-2.2,0.5)            | 0.20         |
| Urbanization         |      |                           |                  |      |                            |                  |      |                          |              |      |                            |              |
| Urban-Semi urban     |      |                           |                  |      |                            |                  |      |                          |              |      |                            |              |
| Greek                | 3305 | <b>-3.5 (-4.6, -2.4)</b>  | <b>&lt;.0001</b> | 1476 | <b>-4.1 (-5.7, -2.5)</b>   | <b>&lt;.0001</b> | 781  | <b>-2.7 (-4.9, -0.5)</b> | <b>0.02</b>  | 1048 | <b>-3.3 (-5.2, -1.4)</b>   | <b>0.001</b> |
| Non-Greek            | 494  | <b>13.3 (9.9, 16.9)</b>   | <b>&lt;.0001</b> | 208  | <b>19.4 (13.7, 25.3)</b>   | <b>&lt;.0001</b> | 110  | <b>11.2 (4.2, 18.6)</b>  | <b>0.001</b> | 176  | <b>8.2 (2.8, 13.8)</b>     | <b>0.002</b> |
| Any*                 | 3807 | <b>-1.6 (-2.6, -0.6)</b>  | <b>0.002</b>     | 1684 | <b>-1.7 (-3.2, -0.1)</b>   | <b>0.03</b>      | 894  | -1.2 (-3.3, 0.9)         | 0.27         | 1229 | <b>-1.8 (-3.6, 0.0)</b>    | <b>0.05</b>  |
| Rural                |      |                           |                  |      |                            |                  |      |                          |              |      |                            |              |
| Greek                | 275  | <b>5.2 (1.3, 9.3)</b>     | <b>0.01</b>      | 69   | <b>24.1 (14.2, 34.8)</b>   | <b>&lt;.0001</b> | 62   | 4.6 (-3.4, 13.3)         | 0.27         | 144  | -2.0 (-7.1, 3.3)           | 0.44         |
| Non-Greek            | 22   | -6.9 (-19.4, 7.5)         | 0.33             | 7    | 14.8 (-8.0, 43.3)          | 0.22             | 3    | -1.9 (-34.7, 47.4)       | 0.93         | 12   | -12.4 (-32.0, 12.9)        | 0.31         |
| All*                 | 298  | <b>4.3 (0.6, 8.2)</b>     | <b>0.02</b>      | 76   | <b>24.4 (14.8, 34.7)</b>   | <b>&lt;.0001</b> | 65   | 3.6 (-4.2, 12.1)         | 0.38         | 157  | -3.4 (-8.2, 1.6)           | 0.18         |
| HDI                  |      |                           |                  |      |                            |                  |      |                          |              |      |                            |              |
| PC                   |      |                           | PC               |      |                            | PC               |      |                          | PC           |      |                            |              |
| Greek                |      | <b>-8.6 (-14.8, -1.9)</b> | <b>0.01</b>      |      | <b>-11.3 (-20.8, -1.4)</b> | <b>0.03</b>      |      | 3.5 (-10.9, 20.1)        | 0.66         |      | <b>-12.3 (-22.2, -1.2)</b> | <b>0.03</b>  |
| Non-Greek            |      | -5.7 (-25.0, 18.7)        | 0.62             |      | -19.8 (-44.8, 16.6)        | 0.25             |      | 20.0 (-28.6, 101.7)      | 0.49         |      | -1.3 (-30.7, 40.5)         | 0.94         |
| All*                 |      | <b>-9.5 (15.3, -3.2)</b>  | <b>0.004</b>     |      | <b>-14.0 (-22.3, -4.7)</b> | <b>0.004</b>     |      | 3.3 (-10.4, 19.3)        | 0.65         |      | <b>-11.4 (-20.8, -0.7)</b> | <b>0.04</b>  |

\*including missing maternal nationality values

**Table 3.** Joinpoint regression derived Annual Percent of Change (APC) and 95% Confidence Intervals (CI) of infant (IMR) and early neonatal mortality rates (ENMR) by maternal nationality (only for indices showing breaks in the time period examined).

| Variable  | Years   | N    | IMR<br>APC (95% CI) | p-value | Time period | N    | ENMR<br>APC (95% CI) | p-value |
|-----------|---------|------|---------------------|---------|-------------|------|----------------------|---------|
| Greek     | 2004-12 | 2870 | -4.5 (-7.6, -1.3)   | 0.01    | 2004-11     | 1118 | -6.5 (-11.4, -1.4)   | 0.02    |
|           | 2012-16 | 1368 | 9.3 (-1.1, 20.9)    | 0.07    | 2011-16     | 731  | 10.2 (-0.4, 21.9)    | 0.06    |
| Non-Greek | 2004-11 | 333  | 17.1 (8.1, 26.9)    | 0.002   |             |      |                      |         |
|           | 2011-16 | 282  | 0.2 (-11.5, 13.5)   | 0.97    |             |      |                      |         |
| All*      | 2004-08 | 1807 | -7.5 (-14.6, 0.3)   | 0.06    | 2004-08     | 780  | -10.7 (-19.9, -0.5)  | 0.04    |
|           | 2008-16 | 3055 | 3.6 (0.7, 6.6)      | 0.02    | 2008-16     | 1327 | 6.1 (2.1, 10.3)      | 0.01    |

\* Including missing maternal nationality values

1  
2  
3  
4  
5  
6  
7  
8  
9  
10  
11  
12  
13  
14  
15  
16  
17  
18  
19  
20  
21  
22  
23  
24  
25  
26  
27  
28  
29  
30  
31  
32  
33  
34  
35  
36  
37  
38  
39  
40  
41  
42  
43  
44  
45  
46  
47

For peer review only



1  
2  
3  
4  
5  
6  
7  
8  
9  
10  
11  
12  
13  
14  
15  
16  
17  
18  
19  
20  
21  
22  
23  
24  
25  
26  
27  
28  
29  
30  
31  
32  
33  
34  
35  
36  
37  
38  
39  
40  
41  
42  
43  
44  
45  
46  
47  
48  
49  
50  
51  
52  
53  
54  
55  
56  
57  
58  
59  
60

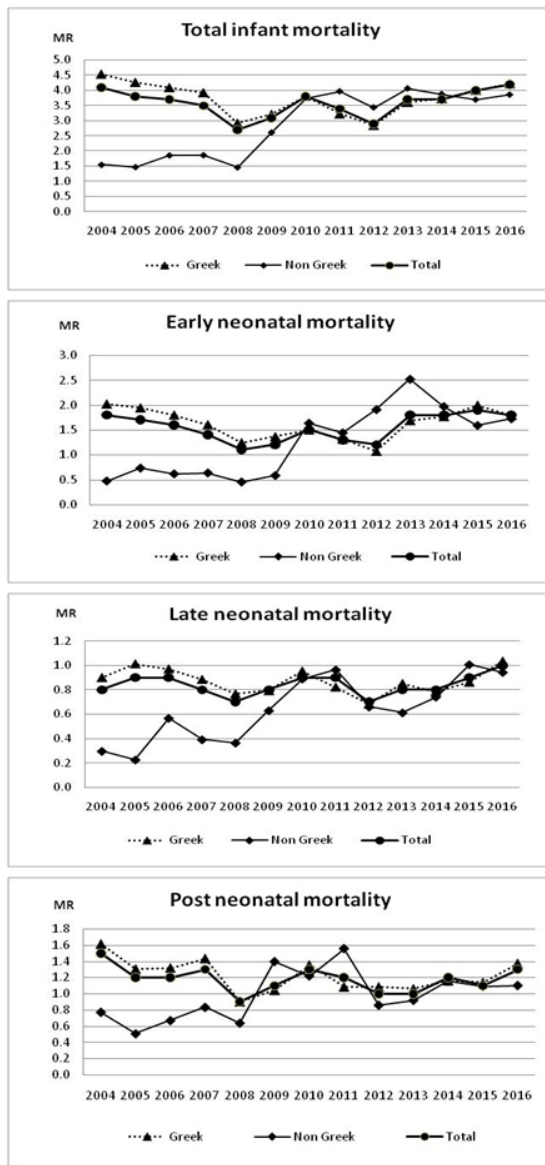

Evolution of Infant Early, Late and Post Neonatal Mortality Rates in Greece (2004-2016) overall and by maternal nationality

60x81mm (300 x 300 DPI)

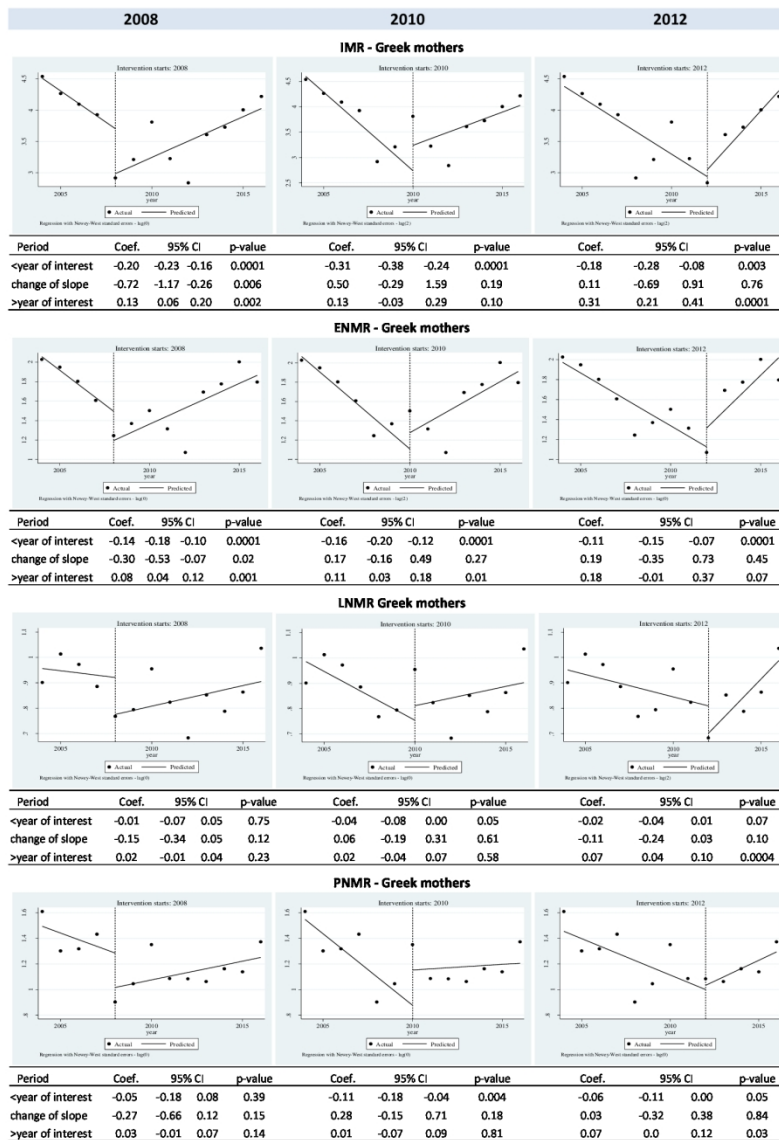

Interrupted Time Series analyses for evolution of infant (IMR), early (ENMR), late (LNMR) and post neonatal mortality rates (PNMR) in alternative prespecified years of interest (2008, 2010 and 2012) in infants born to Greek mothers.

140x198mm (300 x 300 DPI)

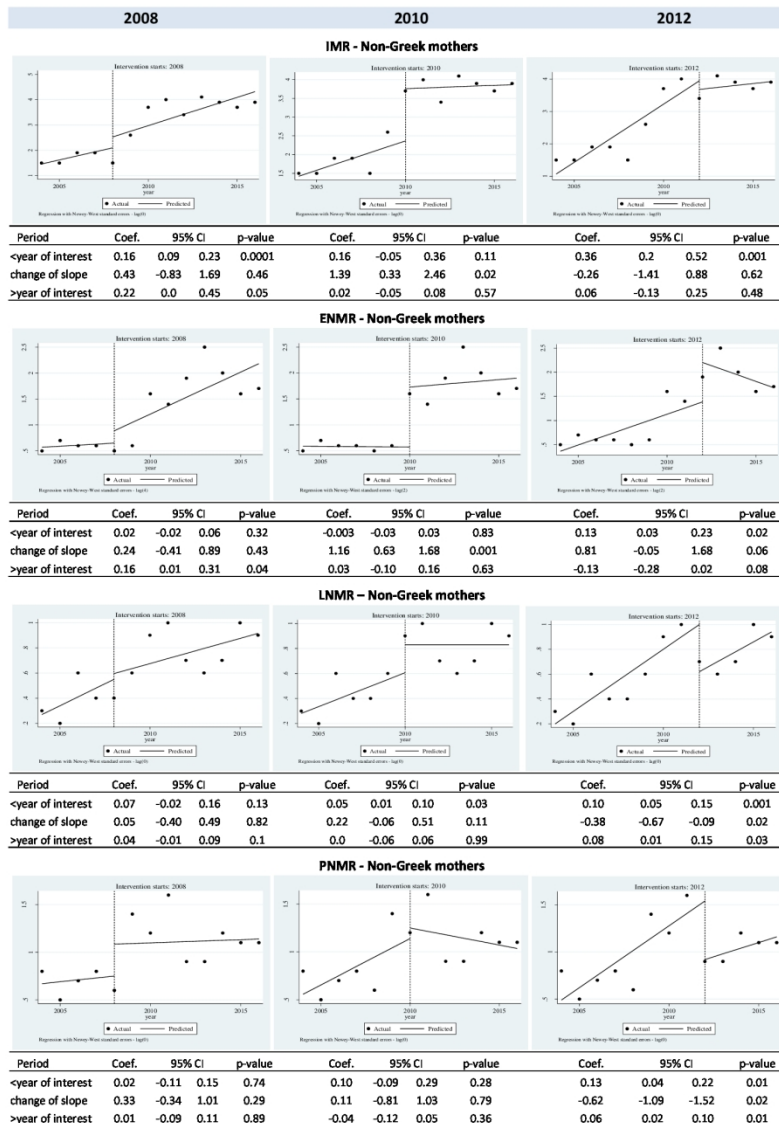

Interrupted Time Series analyses for evolution of infant (IMR), early (ENMR), late (LNMR) and post neonatal mortality rates (PNMR) in alternative prespecified years of interest (2008, 2010 and 2012) in infants born to non-Greek mothers.

140x198mm (300 x 300 DPI)

## Research checklist- STROBE Statement—checklist

|                           | Item No | Page number |
|---------------------------|---------|-------------|
| <b>Title and abstract</b> | 1       | 1           |
|                           |         | 3           |
| <b>Introduction</b>       |         |             |
| Background/rationale      | 2       | 6-7         |
| Objectives                | 3       | 7           |
| <b>Methods</b>            |         |             |
| Study design              | 4       | 7-9         |
| Setting                   | 5       | 7           |
| Participants              | 6       | 7-8         |
| Variables                 | 7       | 7-9         |
| Data sources/ measurement | 8*      | 7-9         |
| Bias                      | 9       | N/A         |
| Study size                | 10      | N/A         |
| Quantitative variables    | 11      | 7-9         |
| Statistical methods       | 12      | 8-9         |
| <b>Results</b>            |         |             |
| Participants              | 13*     | 9-10        |
| Descriptive data          | 14*     | 9-10        |
| Outcome data              | 15*     | 9-11        |
| Main results              | 16      | 9-11        |
| Other analyses            | 17      | N/A         |
| <b>Discussion</b>         |         |             |
| Key results               | 18      | 12          |
| Limitations               | 19      | 12-13       |
| Interpretation            | 20      | 13-18       |
| Generalisability          | 21      | 17-18       |
| <b>Other information</b>  |         |             |
| Funding                   | 22      | 25          |

# BMJ Open

## Disparities of infant and neonatal mortality trends in Greece during the years of economic crisis by ethnicity, place of residence and human development index: a nationwide population study

|                                 |                                                                                                                                                                                                                                                                                                                                                                                                                                                                                                                                                                                                                                                                                                                                                                                                                                                                                                                                                                                                                                               |
|---------------------------------|-----------------------------------------------------------------------------------------------------------------------------------------------------------------------------------------------------------------------------------------------------------------------------------------------------------------------------------------------------------------------------------------------------------------------------------------------------------------------------------------------------------------------------------------------------------------------------------------------------------------------------------------------------------------------------------------------------------------------------------------------------------------------------------------------------------------------------------------------------------------------------------------------------------------------------------------------------------------------------------------------------------------------------------------------|
| Journal:                        | <i>BMJ Open</i>                                                                                                                                                                                                                                                                                                                                                                                                                                                                                                                                                                                                                                                                                                                                                                                                                                                                                                                                                                                                                               |
| Manuscript ID                   | bmjopen-2018-025287.R2                                                                                                                                                                                                                                                                                                                                                                                                                                                                                                                                                                                                                                                                                                                                                                                                                                                                                                                                                                                                                        |
| Article Type:                   | Research                                                                                                                                                                                                                                                                                                                                                                                                                                                                                                                                                                                                                                                                                                                                                                                                                                                                                                                                                                                                                                      |
| Date Submitted by the Author:   | 11-Mar-2019                                                                                                                                                                                                                                                                                                                                                                                                                                                                                                                                                                                                                                                                                                                                                                                                                                                                                                                                                                                                                                   |
| Complete List of Authors:       | Siahanidou, Tania; First Department of Pediatrics, National and Kapodistrian University of Athens, School of Medicine<br>Dessypris, Nick; Department of Hygiene, Epidemiology and Medical Statistics, School of Medicine, National & Kapodistrian University of Athens<br>Analitis, Antonis; Department of Hygiene, Epidemiology and Medical Statistics, School of Medicine, National & Kapodistrian University of Athens<br>Mihas, Constantinos; Department of Hygiene, Epidemiology and Medical Statistics, School of Medicine, National and Kapodistrian University of Athens<br>Evangelou, Evangelos; Dept of Hygiene and Epidemiology; Department of Epidemiology and Biostatistics, Imperial College<br>Chrousos, George; First Department of Pediatrics, National and Kapodistrian University of Athens, School of Medicine<br>PETRIDOU, ELENI; Department of Hygiene, Epidemiology and Medical Statistics, School of Medicine, National & Kapodistrian University of Athens; Clinical Epidemiology Unit, Karolinska Institute, 171 77 |
| <b>Primary Subject Heading</b>: | Paediatrics                                                                                                                                                                                                                                                                                                                                                                                                                                                                                                                                                                                                                                                                                                                                                                                                                                                                                                                                                                                                                                   |
| Secondary Subject Heading:      | Epidemiology, Public health, Health policy, Global health                                                                                                                                                                                                                                                                                                                                                                                                                                                                                                                                                                                                                                                                                                                                                                                                                                                                                                                                                                                     |
| Keywords:                       | Neonates, Mortality rates, Infant deaths, perinatal care, financial crisis                                                                                                                                                                                                                                                                                                                                                                                                                                                                                                                                                                                                                                                                                                                                                                                                                                                                                                                                                                    |
|                                 |                                                                                                                                                                                                                                                                                                                                                                                                                                                                                                                                                                                                                                                                                                                                                                                                                                                                                                                                                                                                                                               |

SCHOLARONE™  
Manuscripts

1  
2  
3 **Disparities of infant and neonatal mortality trends in Greece during the years of economic**  
4 **crisis by ethnicity, place of residence and human development index: a nationwide**  
5 **population study**  
6  
7  
8  
9

10  
11  
12 Tania Siahaniidou, Nick Dessypris, Antonis Analitis, Constantinos Mihas, Evangelos Evangelou,  
13  
14 George Chrousos, Eleni Th Petridou  
15

16  
17  
18  
19 First Department of Pediatrics, School of Medicine, National and Kapodistrian University of  
20  
21 Athens, 11527 Athens, Greece  
22

23  
24 Tania Siahaniidou  
25

26  
27 Associate Professor in Pediatrics-Neonatology  
28

29  
30 Department of Hygiene, Epidemiology and Medical Statistics, School of Medicine, National  
31  
32 and Kapodistrian University of Athens, 11527 Athens, Greece  
33

34  
35 Nick Dessypris  
36

37  
38 Research Associate  
39

40  
41 Department of Hygiene, Epidemiology and Medical Statistics, School of Medicine, National  
42  
43 and Kapodistrian University of Athens, 11527 Athens, Greece  
44

45  
46 Antonis Analitis  
47

48  
49 Research Associate  
50

51  
52 Department of Hygiene, Epidemiology and Medical Statistics, School of Medicine, National  
53  
54 and Kapodistrian University of Athens, 11527 Athens, Greece  
55

56  
57 Constantinos Mihas  
58

59  
60 MD General Medicine, Research Associate

1  
2 Department of Hygiene and Epidemiology, University of Ioannina Medical School, Ioannina,  
3  
4 Greece and Department of Epidemiology and Biostatistics, Imperial College London, London,  
5  
6  
7 UK

8  
9 Evangelos Evangelou

10  
11 Assistant Professor of Clinical and Molecular Epidemiology

12  
13  
14  
15 First Department of Pediatrics, School of Medicine, National and Kapodistrian University of  
16  
17 Athens, 11527 Athens, Greece

18  
19 George Chrousos

20  
21 Professor of Pediatrics

22  
23  
24  
25 Department of Hygiene, Epidemiology and Medical Statistics, School of Medicine, National  
26  
27 and Kapodistrian University of Athens, Athens 11527, Greece & Clinical Epidemiology Unit,  
28  
29 Karolinska Institute, 171 77, Stockholm, Sweden

30  
31 Eleni Th Petridou

32  
33 Professor of Preventive Medicine & Epidemiology

34  
35  
36  
37  
38  
39  
40  
41 **Correspondence to:** Tania Sihanidou; [sihan@med.uoa.gr](mailto:sihan@med.uoa.gr)

**ABSTRACT****OBJECTIVE**

To study trends of infant (IMR) and neonatal mortality rate in Greece during the period 2004-2016 and explore the role of sociodemographic factors in the years of crisis

**DESIGN**

Nationwide individual data for livebirths and infant (0-11 months) deaths provided by the Hellenic Statistical Authority (ELSTAT) were examined using Poisson regression, joinpoint regression and Interrupted Time Series (ITS) statistical analyses.

**SETTING**

Greece

**PARTICIPANTS**

All infant deaths (n=4862) over the 13-year period, of which 87.2% were born to Greek mothers, and respective livebirths.

**MAIN OUTCOME MEASURES**

Evolution of IMR (0-364 days), early (<7 days, ENMR)/late (7-27 days, LNMR) neonatal and post neonatal (28-364 days, PNMR) mortality trends, by maternal nationality, place of residence and Human Development Index (HDI).

**RESULTS**

Overall, during the study-period among infants of Greek mothers, IMR -particularly PNMR- declined significantly (-0.9%; 95% CI -1.7% to -0.1% and -1.6%; -3.0% to -0.2% annually, respectively), albeit differentially by place of residence (max=IMR<sub>urban</sub>: -4.1%; -5.7% to -2.5%, max=ENMR<sub>rural</sub>: +24.1%; 14.2% to 34.8%). By contrast, among infants of non-Greek mothers, the low starting IMR/ENMR/LNMR/PNMR increased significantly (max ENMR: +12.5%; 8.6% to 16.5%) leading to a non-statistically significant, positive time-trend pattern overall in Greece. The inverse associations of HDI with IMR, ENMR and PNMR were restricted to Greek



1  
2 mothers' infants. Of note, joinpoint regression analyses among Greek infants indicated  
3  
4 increases of IMR following the crisis at the limit of statistical significance (+9.3%, 2012-2016,  
5  
6  $p=0.07$ ), mainly ENMR (+10.2%, 2011-2016,  $p=0.06$ ). By contrast, the high (+17.1%; 8.1% to  
7  
8 26.9%,  $p=0.002$ ) IMR increases among non-Greek infants were restricted to 2004-2011 and  
9  
10 equalized to those of Greek mothers' infants thereafter. ITS analyses in preset years (2008,  
11  
12 2010, 2012) overall confirmed the joinpoint results and identified adverse trends in LNMR  
13  
14 and PNMR after 2012 among Greek infants.  
15  
16  
17  
18  
19

## 20 CONCLUSIONS

21  
22 HDI and rural residence were significantly associated with IMR. The strongly decreasing IMR  
23  
24 -especially ENMR- trends among Greeks were stagnated after a lag time of ~four years of  
25  
26 crisis approximating the previously sharply increasing trends among non-Greek infants.  
27  
28  
29  
30  
31  
32  
33  
34

## 35 Strengths of this study

- 36 • Longest follow-up period of national data, as contrasted to previously Greek-based  
37 studies.  
38
- 39 • Maternal ethnicity is for first time considered in the analyses explaining part, if not  
40 most, of the heterogeneity of trends through the study period.  
41
- 42 • Three complimentary statistical methodologies were used to describe the overall  
43 evolution of infant mortality and its components.  
44  
45  
46  
47  
48  
49  
50  
51

## 52 Limitations

- 53 • Absence of a linkage system between birth and death data.  
54
- 55 • Data on the role of biological factors or specific causes of infant death are missing.  
56  
57  
58  
59  
60

1  
2  
3  
4  
5  
6  
7 **Abbreviations:**  
8

9  
10 IM; infant mortality  
11

12 IMR; infant mortality rates  
13

14 ENMR; early neonatal mortality rates  
15

16 LNMR; late neonatal mortality rates  
17

18 PNMR; post neonatal mortality rates  
19

20 HDI; Human Development Index  
21

22 ELSTAT; Hellenic Statistical Authority  
23

24 ITS; Interrupted Time Series  
25  
26  
27  
28  
29  
30  
31  
32  
33  
34  
35  
36  
37  
38  
39  
40  
41  
42  
43  
44  
45  
46  
47  
48  
49  
50  
51  
52  
53  
54  
55  
56  
57  
58  
59  
60

## Introduction

Socioeconomic factors have repeatedly been recognized as strong determinants of the health status of the population, including infants.<sup>1-3</sup> Economic indicators, such as the *per capita* Gross National Product, were suggested to be at least as important contributors of infant mortality (IM) as narrowly defined factors relating to provision of medical care, e.g. the relative number of doctors or hospital beds in a community.<sup>1</sup> Not surprisingly, the recent economic crisis of ~2008, has been linked with declines in population and child health reflected also by increased IM rates (IMR).<sup>4,5</sup> It is worth noting that in European Union countries, even a minor 1% cut in government healthcare spending was associated with significant increases in all mortality metrics, including neonatal and post neonatal IM.<sup>6</sup>

On the contrary, associations between the crisis and increased mortality have been questioned in other studies showing that most indicators of population health, apart from those relevant to suicides and mental health, continued improving after crisis initiation.<sup>7-10</sup> Moreover, the economic crisis has been associated with some beneficial effects, i.e. decline in rates of road traffic accidents, and smoking cessation.<sup>4,9</sup> Reasonably, the impact of the crisis on health depends on several factors including the duration and intensity of the recession, the level of health care achieved prior to the recession and the type of austerity measures applied, but also on the type of the population studied with the most vulnerable groups being disproportionately affected.<sup>4,11,12</sup> Due to the latter, it was proposed that studies should focus on analyzing separately the subgroups most influenced by the crisis instead of presenting results as averages in a population.<sup>4</sup>

Greece has been markedly affected and still suffering the recent economic crisis. Between 2008 and 2016, the country's GDP *per capita* dropped by 26%, unemployment rate increased by more than 200% (from 7.6% to 23.3%) and the median disposable income decreased by 35%.<sup>13,14</sup> The GINI index, which measures income inequality, increased by 22% and the

1  
2 proportion of individuals at risk of poverty or social exclusion climbed to almost 36% in 2016.  
3  
4 Total health expenditures and government expenditure on health care were both decreased  
5  
6 by 34% per capita over the period 2008-2016,<sup>13,14</sup> whereas unmet healthcare needs  
7  
8 increased.<sup>15</sup> Besides, during the last years, Greece experienced large refugee flows<sup>16,17</sup> with  
9  
10 an anticipated negative impact on the country's economy and population health indicators.  
11  
12 Adverse effects of financial crisis on perinatal factors, such as low birth weight, preterm birth  
13  
14 and stillbirth rates, have been also observed;<sup>18,19</sup> however, sparse data exist regarding the  
15  
16 potential association of the crisis with IMR. It has been initially reported that during the  
17  
18 period 2003-2012, IMR in Greece did not differ between the pre-crisis and crisis period  
19  
20 whereas, a later study showed that IMR increased between 2010 and 2015 as contrasted to  
21  
22 the steady decrease observed during the preceding decade.<sup>20,21</sup> Ecological correlations may  
23  
24 prone, however, to fallacies, whereas the different parts shaping the two main components  
25  
26 of IM, namely neonatal (NM) and post neonatal mortality (PNM), should have been distinctly  
27  
28 examined along with other factors possibly influencing the infants' health, especially  
29  
30 socioeconomic status and access to health care delivery.  
31  
32 The aims of the current study were to explore time trends in early (<7 days of life) and late  
33  
34 (7-27 days) neonatal, post neonatal (28-364 days) and total IM (0-364 days) in Greece during  
35  
36 the period 2004-2016 after taking into account nationality and place of residence, as well as  
37  
38 changes in the Human Development Index (HDI) during the study period as a proxy of  
39  
40 individual and collective measures of socioeconomic impact and health care access.  
41  
42  
43  
44  
45  
46  
47  
48  
49  
50  
51  
52  
53

## 54 **Materials and Methods**

55  
56 Following personal contact and a signed agreement, individual data for all livebirths and  
57  
58 infant (0-11 months) deaths were provided by the Hellenic Statistical Authority (ELSTAT) for  
59  
60 a 13-year period (2004-2016) in two separate files: one including live births and a second

1  
2 one, infant deaths; linkage of the two files was not possible as the personal identification  
3 number was not available in ELSTAT. Information on maternal demographic characteristics,  
4  
5 such as nationality (available for years 2004-2016) and place of residence (available for years  
6  
7 2004-2014), as well as on the infants' age at death, were also provided.  
8  
9

10  
11 Mortality rates were calculated for infant (IM), early neonatal (0-6 days) (ENM), late  
12 neonatal (7-27 days) (LNM) and post neonatal (28-364 days) period (PNM) using respective  
13 numbers of deaths over the number of livebirths per year. Annual percent of change (APC)  
14 during the study period was initially estimated through univariate Poisson regression  
15 analysis using the underlying population of each set as an offset variable. Subsequently, data  
16 were stratified and analyzed by maternal nationality (Greek vs. non-Greek) and place of  
17 residence (Urban/Semi-urban vs. Rural). Joinpoint regression analysis<sup>22</sup> was thereafter  
18 applied to automatically derive, by a software program, different segments in the mortality  
19 evolution curves overall, as well as those by maternal nationality and place of residence; the  
20 Joinpoint regression analysis is usually applied to study varying trends over time in order to  
21 identify the time point(s) in which the trend significantly changes. Interrupted Time Series  
22 (ITS) analyses were also undertaken as a sensitivity analysis to further explore the effect of  
23 crisis on IMR and its components in alternative prespecified years, notably 2008, considered  
24 to indicate the initiation of the crisis in Greece -as the value of the Gross Domestic Product  
25 of the country was maximum at that year but dropped afterwards (Source: Aggregate National  
26 Accounts)-, and in two successive periods two years apart (2010 and 2012), to control for  
27 possible time lags in observing the impact of the crisis. All ITS models were verified and  
28 appropriately adjusted for possible auto-correlation; autoregressive integrated moving-  
29 average models were used to control for autocorrelation and to estimate treatment effects over  
30 multiple periods. In our ITS analysis a slope "<year of interest" is fitted until the introduction  
31 of the crisis, ">year of interest" represents the change in the level of the mortality immediately  
32  
33  
34  
35  
36  
37  
38  
39  
40  
41  
42  
43  
44  
45  
46  
47  
48  
49  
50  
51  
52  
53  
54  
55  
56  
57  
58  
59  
60

1  
2 following the initiation of the crisis and “change of slope” represents the differences between  
3  
4 pre and post crisis intervention slopes.  
5

6  
7 Human development index (HDI) is a summary measure of average achievements of a  
8  
9 country’s population in three areas including life expectancy, education and *per capita*  
10  
11 income indicators. Annual HDI values for the underlying populations in the year of death  
12  
13 were extracted from the United Nations Development Program website  
14  
15 (<http://hdr.undp.org/en/composite/HDI>), whereas Poisson regression analysis was used to  
16  
17 explore the association of one standard deviation of HDI with total IM and its components.  
18  
19 All statistical analyses were performed using the SAS software (V9.4, SAS Institute Inc.), Stata  
20  
21 software program, version 13 (StataCorp. 2013. Stata Statistical Software: Release 13.  
22  
23 College Station, TX: StataCorp LP) and Joinpoint Regression Program (Joinpoint Regression  
24  
25 Program, Version 4.5.0.1 - June 2017; Statistical Methodology and Applications Branch,  
26  
27 Surveillance Research Program, National Cancer Institute).  
28  
29  
30  
31  
32  
33  
34  
35  
36

### 37 **Patient involvement**

38  
39 No patients were involved in setting the research question or the outcome measures, nor  
40  
41 were they involved in developing plans for design or implementation of the study. No  
42  
43 patients were asked to advise on interpretation or writing up of results. There are no plans  
44  
45 to disseminate the results of the research to study participants or the relevant patient  
46  
47 community.  
48  
49  
50

51  
52  
53 **Ethical approval:** Not required.  
54  
55  
56

### 57 **Results**

58  
59  
60

1  
2  
3 The annual average number of livebirths during the study period was 105077, ranging from a  
4 high 118302 (2008) to a low 91847 livebirths in 2015. The annual average proportion of  
5 Greek mothers was 83.7%, whereas the remaining were mainly economic migrants. During  
6  
7 the period 2004-2016, a total of 4862 infant deaths were recorded of whom 4238 (87.2%)  
8  
9 were of infants born to Greek mothers, whereas among the remaining 615 deaths of infants  
10  
11 born to non-Greek mothers, 298 (48.5%) were of infants born to Albanian mothers, 146  
12  
13 (23.7%) of infants born to mothers from Balkan countries and countries of the former Soviet  
14  
15 Union, 77 (12.5%) from Asia, 47 (7.6%) from countries of the European Union or other  
16  
17 developed countries and 47 (7.6%) from Africa. During the early and late neonatal period,  
18  
19 2107 (43.3%) and 1136 (23.4%) deaths occurred, respectively, whereas another 1617  
20  
21 (33.3%) of deaths were recorded in the post neonatal period. The annual average IMR was  
22  
23 3.5 over 1000 livebirths, whereas the corresponding figures for the early, late and post  
24  
25 neonatal period were 1.5‰, 0.8‰ and 1.2‰ respectively. The number of livebirths and  
26  
27 infant deaths, total IMR per 1000 livebirths in infants born to Greek and non-Greek mothers,  
28  
29 as well as HDI values, in Greece, during the study period, are shown in Table 1. Moreover,  
30  
31 infant deaths and total infant mortality rates (IMR) by place of residence (Urban/Semi-urban  
32  
33 vs. Rural) are shown in Suppl. Table 1.

34  
35  
36  
37  
38  
39  
40  
41  
42  
43  
44 Of note, in the beginning of the study period in 2004, notably well before the initiation of  
45  
46 the crisis, IMR and its components were 2- to 4-fold higher among infants born to Greek  
47  
48 mothers in comparison with rates in infants born to non-Greek origin mothers. During the  
49  
50 subsequent 4-5 years, however, rates among Greeks followed downward trends whereas  
51  
52 among non-Greeks inflated reaching almost similar values to those observed in infants born  
53  
54 to Greek mothers (Figure 1).

55  
56  
57  
58  
59 Overall, during the study-period, among infants born to Greek mothers, IMR, particularly  
60  
PNMR, declined significantly (-0.9%; 95% CI -1.7% to -0.1% and -1.6%; -3.0% to -0.2%

1  
2 annually, respectively,  $p=0.02$  for each), albeit differentially by place of residence (Table 2);  
3  
4 significant decline of IMR trends (-3.5%; -4.6% to -2.4% annually,  $p<0.0001$ ) and all its  
5  
6 components was observed among infants born to Greek mothers living in urban areas  
7  
8 whereas, among infants born to Greek mothers in rural areas, a significant increase of IMR  
9  
10 trend was observed (+5.2%; 1.3% to 9.3% annually,  $p=0.01$ ) resulting mainly from increased  
11  
12 ENMR (+24.1%; 14.2% to 34.8% annually,  $p<0.0001$ ). By contrast, among infants of non-  
13  
14 Greek mothers, the low starting IMR increased significantly (+9.4%; 6.9% to 11.9% annually,  
15  
16  $p<0.0001$ ), due to significant increases of ENMR, LNMR and PNMR (max ENMR: +12.5%;  
17  
18 8.6% to 16.5% annually,  $p<0.0001$ ) leading to a non-significant pattern of IMR evolution for  
19  
20 Greece overall ( $p=0.50$ ) (Table 2). Further analysis by nationality of non-Greek mothers  
21  
22 showed significant increases of IMR trends in all ethnic groups with average annual percent  
23  
24 change 7.6% (95% CI; 4.2% to 11.1%) in infants born to Albanian mothers, 8.6% (3.7% to  
25  
26 13.8%) in infants born to mothers from Balkan countries and countries of the former Soviet  
27  
28 Union, 9.4% (2.8% to 16.3%) in infants born to mothers from Asia, 9.4% (1.1% to 18.3%) in  
29  
30 infants born to mothers from countries of the European Union or other developed countries,  
31  
32 and 21.1% (11.0% to 32.3%) in infants born to mothers from Africa. HDI trends increased  
33  
34 significantly, by 0.1% (95% CI 0.06% to 0.13%) annually during the study period. Inverse  
35  
36 associations of HDI with IMR, ENMR and PNMR, restricted to Greek mothers' infants, were  
37  
38 observed (Table 2).  
39  
40  
41  
42  
43  
44  
45  
46  
47  
48

49 In order to examine whether IMR, in our study population, might have influenced by any  
50  
51 variation in the registration of births in cases of uncertain viability, we analyzed separately  
52  
53 the infant deaths in the first day of life; trends of IMR in this age group, over the study  
54  
55 period, were non-significant (average annual percent change: -1.22%; 95% CI: -3.79% to  
56  
57 1.42%;  $p=0.36$ ).  
58  
59  
60



Results of joinpoint regression analyses were similar to those derived by the Poisson regression apart from models displayed in Table 3 pertaining to IMR and ENMR trends. Specifically, a break was identified among Greek infants restricting the decreasing IMR trend to the period 2004-2012 (-4.5%; 95% CI -7.6% to -1.3% annually,  $p=0.01$ ); this was mainly due to a significant decline in ENMR trend till 2011 (-6.5%; 95% CI -11.4% to -1.4% annually,  $p=0.02$ ). Of note, however, in the most recent study period (2012-2016) increases of IMR at the limit of statistical significance (+9.3% annually,  $p=0.07$ ) and ENMR (+10.2% annually,  $p=0.06$ ) were observed with no indication any more of differentiation by place of residence. By contrast, among infants born to non-Greek mothers, the high IMR increases (+17.1%; 95% CI 8.1% to 26.9% annually,  $p=0.002$ ) were restricted to the period 2004-2011 with no fluctuation thereafter; finally, IMR approximated those of Greek mothers' infants (Table 3). ITS analyses in the preset years 2008, 2010 and 2012 (Figures 2 and 3) confirmed the joinpoint analysis results and further identified adverse trends in LNMR and PNMR after 2012 among Greek infants (Figure 2).

## Discussion

Trends of neonatal and infant mortality in Greece, spanning from year 2004 -before the initiation of crisis in 2008- to year 2016, are not homogeneous, given significant increases in the relatively small proportion of infants born to non-Greek nationality mothers as contrasted to declining IMR trends among Greek infants, and increases in indices indicating differentials in proxies of health care access among Greek neonates, such as ENMR, noted ~four years after the crisis, which led to offsets of the urbanization differentials observed overall. Specifically, the "brake" of 2012 identified increases of ~10% annually, thereafter (at the limit of statistical significance), in IMR and ENMR trends among infants born to Greek mothers. Changes in HDI during the study period were also reflected in the inverse

1  
2 associations of HDI with ENMR and IMR, but also PNMR, among infants born to Greek  
3 mothers.  
4  
5

6  
7 Strengths of the present investigation, as contrasted to previously Greek-based published  
8 studies,<sup>9,18,20,21,23</sup> include the longest follow-up period of national data, namely since 2004,  
9 before the crisis, when the first data on maternal ethnicity became electronically available,  
10 to the latest available year 2016. Of great importance is also the fact that, for the first time,  
11 the maternal ethnicity was considered in the analyses explaining part, if not most, of the  
12 heterogeneity of trends through the study period. To this end, three complimentary  
13 statistical methodologies were used to describe the overall evolution depicted in Figure 1.  
14 Thus, we were able to enhance the validity of the results pertaining to the study of the  
15 evolution of individual IMR components, namely ENMR, LNMR and PNMR, in association  
16 with socioeconomic factors (i.e maternal nationality, place of residence and HDI) for which  
17 individual data have been available on a nationwide level among both deaths and livebirths  
18 during the study period. Calculation of IMR and its components was based on the number of  
19 livebirths; yet, the absence of a linkage system between birth and death data, as well as  
20 other official registries in Greece, has not allowed use of known determinants of  
21 socioeconomic deprivation or social coherence, such as parental education,  
22 employment/occupation, marital status, family income and household size. Neither were  
23 data on the role of biological factors, such as parental age, gestational age and birthweight,  
24 or multiplicity of pregnancy available for both the livebirths and deaths series.<sup>5,19,24</sup> Besides,  
25 the study period, with available information on maternal nationality and place of residence,  
26 was rather short leading to ITS analyses with few data points; however, ITS analysis can be  
27 used even for few observations; no log-transformation is needed but the results should be  
28 interpreted with caution as the power depends on various factors.<sup>25</sup> Lastly, analyses by specific  
29 cause of infant death were not set among the outcome measures of this study.  
30  
31  
32  
33  
34  
35  
36  
37  
38  
39  
40  
41  
42  
43  
44  
45  
46  
47  
48  
49  
50  
51  
52  
53  
54  
55  
56  
57  
58  
59  
60

1  
2  
3 Assessing migration as a determinant of perinatal health outcome and infant death in the  
4  
5 developed countries is a complex undertaking resulting in conflicting results of published  
6  
7 studies. Specifically, some studies, have shown that ethnic minority is a significant risk factor  
8  
9 for unfavorable perinatal outcomes and increased neonatal and infant mortality,<sup>18,26-33</sup>  
10  
11 especially if it coincides with a financial crisis, as was the case in Greece. Factors possibly  
12  
13 contributing to the increased risk for poorer outcomes among children born to migrants  
14  
15 include socioeconomic disadvantage, poor communication, discrimination, reduced  
16  
17 utilization of health facilities, low quality of care, but also stress and consanguinity or  
18  
19 differing attitudes to screening and termination of pregnancy associated with preterm birth,  
20  
21 low birth weight or congenital anomalies and lethal inherited diseases.<sup>26,30,34-36</sup> By contrast,  
22  
23 other studies present similar or even better perinatal health outcomes among some migrant  
24  
25 groups than among natives (“healthy migrant effect/paradox”).<sup>26-28,37,38</sup> Refugees have been  
26  
27 recognized as the most vulnerable group suffering increased severe neonatal morbidity and  
28  
29 infant mortality risk,<sup>26,28</sup> although no absolutely clear pattern regarding refugee or non-  
30  
31 refugee status among migrants has been identified.<sup>34</sup>  
32  
33  
34 In our study, starting rates of IMR and its components among infants born to non-Greek  
35  
36 mothers were lower compared to those of Greek mothers. Of note, the ratio of non-Greek  
37  
38 infants among live births during 2009-2016 vs. 2004-2008 was only 1.32, whereas the  
39  
40 respective figure among infant deaths was almost 3-fold (data not shown). Actually, in the  
41  
42 pre-crisis era, non-Greek mothers of newborns comprised mainly economic migrants, most  
43  
44 of them of Albanian nationality living for many years, or even born, in Greece. After 2008,  
45  
46 Greece experienced an influx of refugees with the majority of them fleeing from war and  
47  
48 terror in Syria, Occupied Palestinian Territory, but also from Afghanistan, Iraq and other  
49  
50 countries.<sup>16,17</sup> It could be suggested that changes in the homogeneity of foreign mothers  
51  
52 during the study period, in association with the country’s economic difficulties, might have  
53  
54  
55  
56  
57  
58  
59  
60

1  
2 led from the “healthy migrant effect”, observed before 2008, to the deterioration of IM  
3 indicators and IMR trends, afterwards, in infants born to non-Greek mothers. We did  
4 observe significant increases in IMR trends in all ethnic groups of non-Greek mothers during  
5 the study period, especially in infants born to mothers from Africa; however as the numbers  
6 by individual maternal nationality were rather small, this issue needs to be further studied.  
7  
8  
9

10 Simultaneously with immigration to/through Greece, the country experienced the third  
11 wave of mass emigration in the 20<sup>th</sup> and 21<sup>st</sup> centuries; over 400,000 Greek citizens left  
12 Greece since the onset of the economic crisis, in 2008, seeking new opportunities and  
13 employment in other countries, mainly Germany, the United Kingdom and the  
14 Netherlands.<sup>39,40</sup> The current emigration wave of Greeks involved mostly highly-educated  
15 people (the so called “brain-drain”) of young age, leading to a decrease in the number of  
16 Greek women of childbearing age.<sup>41</sup> This fact, along with the decrease in the fertility rate by  
17 almost 10% between 2008 and 2016, contributes significantly to the reduction in the annual  
18 number of livebirths in Greece by almost 23% during the period of the economic crisis.<sup>41,42</sup>  
19 Furthermore, the flow of mostly affluent and well educated people going outside Greece  
20 could also contribute to increases in IMR among Greek children following the crisis.  
21  
22  
23  
24  
25  
26  
27  
28  
29  
30  
31  
32  
33  
34  
35  
36  
37  
38  
39  
40  
41

42 Indeed, the strongly decreasing IMR, especially ENMR, trends among Greek infants were  
43 stagnated after a lag time of ~four years of crisis and equalized with the previously sharply  
44 increasing trends among non-Greek maternal nationality infants; this time lag is reasonable<sup>43</sup>  
45 and in line with previous findings showing that following reductions in the government  
46 healthcare spending in Europe, the greatest negative effect on neonatal and post neonatal  
47 mortality was 4 and 5 years later, respectively.<sup>6</sup> The irony is that the period 2012-2016,  
48 during which the crisis was deepening<sup>13,14</sup> and stricter economic austerity measures were  
49 applied,<sup>44</sup> disparities gap in IMR trends diminished against the Greek population; IMR trends  
50  
51  
52  
53  
54  
55  
56  
57  
58  
59  
60

1  
2  
3 deteriorated only in infants born to Greek mothers, whereas in infants born to non-Greek  
4  
5 mothers IMR trends approached an anelastic highest value up to 2011 with no fluctuation  
6  
7 thereafter. The importance of two sub-analyses of IMR trends by maternal nationality (Greek  
8  
9 vs. non-Greek) should be emphasized; when trends in the entire study population were  
10  
11 assessed, year 2008, considered the year of crisis initiation, was misleadingly identified as a  
12  
13 break in IMR and ENMR trends by joinpoint regression analysis, in line with findings of  
14  
15 previous relevant studies in Greece which did not take into consideration the maternal  
16  
17 nationality.<sup>20</sup>

18  
19 Disparities in IMR still exist across geographic areas even in well developed countries; i.e.  
20  
21 IMR in the United States vary by urbanization level of maternal residency being lowest in  
22  
23 large urban counties but highest in rural areas.<sup>45</sup> Rural women may face health challenges  
24  
25 related to geographic barriers to care (less timely and/or appropriate care) and physician  
26  
27 shortages, but they may also present differences in a number of socioeconomic and  
28  
29 demographic risk factors, such as less education, lower income, younger age at pregnancy,  
30  
31 or greater number of children, in comparison with their urban counterparts.<sup>46,47</sup> The  
32  
33 increasing IMR trends during the study period in infants born to Greek mothers living in rural  
34  
35 areas, as opposed to the declining IMR trends in those born to Greek mothers living in  
36  
37 urban/semi urban areas, is worrisome; specific causes should be further studied and  
38  
39 addressed. As regards infants born to non-Greek mothers, the increasing IMR trends despite  
40  
41 living in urban areas can be explained by previous reports showing that other risk factors, i.e.  
42  
43 young maternal age (<20 years) or maternal ethnic minority, may be more powerful than  
44  
45 place of residence.<sup>47</sup>

46  
47 As expected, among the three IMR components, ENMR was the most “sensitive” in reflecting  
48  
49 adverse impacts on child health as further reflected in the IMR trends. Specifically, ENMR  
50  
51 was overall positively associated with rural place of residence of Greek children, notably  
52  
53  
54  
55  
56  
57  
58  
59  
60

1  
2 before the “break” of 2012, with the increased ENMR neutralizing the urbanization  
3 differentials among newborns of Greek mothers. ENMR, in developed countries, including  
4 Greece, represents more than 70% of neonatal deaths on account mainly of prematurity/low  
5 birth weight and congenital anomalies.<sup>14,48-51</sup> Actually, it reflects perinatal health and care  
6 during pregnancy and labor, and also postnatal care in the first week of life.<sup>50</sup> Increased  
7 incidence of impaired perinatal parameters including low birth weight, prematurity, and  
8 increased maternal age and rate of caesarian section, have been reported during the years  
9 of the economic decline in Greece.<sup>18,19</sup> Cuts in public health expenditures between 2008 and  
10 2016, reduction in health care workforce and pediatric nurses, as well as reduction in the  
11 number of obstetrics beds, obstetricians and midwives (-45.5%, -60.2% and -27.5%,  
12 respectively)<sup>14</sup> could possibly explain, at least in part, the observed positive ENMR trends  
13 during the post-crisis period in Greece.

14  
15 The exact mechanisms leading to the disparities in trends of neonatal and infant mortality  
16 observed in this study remain to be further explored. Specific maternal, family and infant  
17 features, including detailed and punctual information on the causes of infant deaths, would  
18 have shed more light on the links between IMR trends and socioeconomic factors but were  
19 beyond the scope of this article and left for future research. Meanwhile, policies and  
20 programs should be implemented to mitigate the negative impact of the crisis on population  
21 and infant health in Greece. Vulnerable groups, such as mothers of non-Greek nationality, of  
22 low income, or rural place of residence, should be specifically addressed and their rights to  
23 health protected. Barriers in the access of refugees to the Greek health care system have  
24 been identified; they are mostly related to language, culture, and inadequate information  
25 about the healthcare system, but also include difficulties in the coordination of Health  
26 Services, transportation problems, issues in obtaining expertise medical assessment in the  
27 camps, lack of continuity of care, financial difficulties in making out-of-pocket payments for

1  
2 health and social care services, and administrative barriers, among others.<sup>52</sup> In response, the  
3  
4 Greek government and several Non-Governmental Organizations initiated commendable  
5  
6 actions, i.e. National Health System services free of charge for uninsured and vulnerable  
7  
8 social groups including asylum seekers , translation services in public hospitals, access to  
9  
10 specialist care/treatment with Gynecologists (mostly women), midwives, dentists,  
11  
12 psychologists, and psychiatrists being lately included in the camp clinics;<sup>52</sup> these actions may  
13  
14 have prevented deterioration of IMR which are being kept at steady levels after 2011 in  
15  
16 infants of non-Greek mothers; efforts should be continued and intensified, however, as to  
17  
18 ensure equity with local populations. Strong governmental integration policy for minorities  
19  
20 paired with initiatives to improve social coherence, a deeply rooted mechanism for  
21  
22 protection of health among those in need in the Greek society, along with further  
23  
24 improvements in primary health care delivery could help to alleviate the cost in infant lives  
25  
26 and ensure healthy adulthood.<sup>32,51</sup> Irrespective of the crisis, improvements in the quality of  
27  
28 perinatal and neonatal care, including centralization of very preterm deliveries,  
29  
30 establishment of regional perinatal centers, monitoring of the implementation of evidence-  
31  
32 based practices in maternity and neonatal units, as well as increase in health expenditures,  
33  
34 health care workforce, number of doctors and midwives/nurses, could decrease ENMR,  
35  
36 eventually leading to overall decrease in IMR in Greece.<sup>50</sup>  
37  
38  
39  
40  
41  
42  
43  
44  
45  
46  
47  
48  
49  
50

## 51 REFERENCES

52  
53 1. Petridou E, Valadian I, Trichopoulos D, Tzonou A, Kyriopoulos Y, Matsaniotis N. Medical  
54  
55 services and socioeconomic factors: Determinants of infant mortality in Greece. *Hygie*  
56  
57 1989;3:20-3.  
58  
59  
60

- 1  
2  
3 2. WHO. The determinants of health. <http://www.who.int/hia/evidence/doh/en> (Date of  
4  
5 access: 30/5/2018)
- 6  
7 3. Zylbersztejn A, Gilbert R, Hjern A, Wijlaars L, Hardelid P. Child mortality in England  
8  
9 compared with Sweden: a birthcohort study. *Lancet* 2018;391(10134):2008-2018.  
10  
11 doi:10.1016/S0140-6736(18)30670-6.
- 12  
13 4. Rajmil L, Fernandez de Sanmamed MJ, Choonara I, et al; International Network for  
14  
15 Research in Inequalities in Child Health (INRICH). Impact of the 2008 economic and financial  
16  
17 crisis on child health: a systematic review. *Int J Environ Res Public Health* 2014;11:6528-46.  
18  
19 doi:10.3390/ijerph110606528.
- 20  
21 5. Glonti K, Gordeev VS, Goryakin Y, Reeves A, Stuckler D, McKee M, Roberts B. A systematic  
22  
23 review on health resilience to economic crises. *PLoS One* 2015;10:e0123117.  
24  
25 doi:10.1371/journal.pone.0123117.
- 26  
27 6. Budhdeo S, Watkins J, Atun R, Williams C, Zeltner T, Maruthappu M. Changes in  
28  
29 government spending on healthcare and population mortality in the European union, 1995–  
30  
31 2010: a cross-sectional ecological study. *J R Soc Med* 2015;108:490-8.  
32  
33 doi:10.1177/0141076815600907.
- 34  
35 7. Tapia Granados JA, Rodriguez JM. Health, economic crisis, and austerity: A comparison of  
36  
37 Greece, Finland and Iceland. *Health Policy* 2015;119:941-53.  
38  
39 doi:10.1016/j.healthpol.2015.04.009.
- 40  
41 8. Regidor E, Barrio G, Bravo MJ, de la Fuente L. Has health in Spain been declining since the  
42  
43 economic crisis? *J Epidemiol Community Health* 2014;68:280-2. doi:10.1136/jech-2013-  
44  
45 202944.
- 46  
47 9. Laliotis I, Ioannidis JPA, Stavropoulou C. Total and cause-specific mortality before and  
48  
49 after the onset of the Greek economic crisis: an interrupted time-series analysis. *Lancet*  
50  
51  
52  
53  
54  
55  
56  
57  
58  
59  
60 *Public Health* 2016;1: e56–e65. doi:10.1016/S2468-2667(16)30018-4.



10. Parmar D, Stavropoulou C, Ioannidis JP. Health outcomes during the 2008 financial crisis in Europe: systematic literature review. *BMJ* 2016;354:i4588. doi:10.1136/bmj.i4588.
11. O'Donnell C, Burns N, Dowrick C, Lionis C, MacFarlane A; RESTORE team. Health-care access for migrants in Europe. *Lancet* 2013; 382:393. doi: 10.1016/S0140-6736(13)61666-9.
12. Karanikolos M, Heino P, McKee M, Stuckler D, Legido-Quigley H. Effects of the Global Financial Crisis on Health in High-Income OECD Countries: A Narrative Review. *Int J Health Serv* 2016;46:208-40. doi: 10.1177/0020731416637160.
13. Organisation for Economic Co-operation and Development OECD data. <https://data.oecd.org> (Date of access: 30/5/2018) (2016).
14. Hellenic Statistical Authority *Statistics*. [www.statistics.gr](http://www.statistics.gr) (Date of access: 30/5/2018) (2016).
15. Zavras D, Zavras AI, Kyriopoulos II, Kyriopoulos J. Economic crisis, austerity and unmet healthcare needs: the case of Greece. *BMC Health Serv Res* 2016;16:309. doi:10.1186/s12913-016-1557-5.
16. European Union. The EU and the migration crisis, July 2017, <http://publications.europa.eu>
17. Mertens E, Rockenschaub G, Economopoulou A, Kreidl P. Assessment of public health issues of migrants at the Greek-Turkish border, April 2011. *Euro Surveill* 2012 Jan 12;17(2). pii: 20056.
18. Zografaki I, Papamichail D, Panagiotopoulos T. Adverse effect of the financial crisis in Greece on perinatal factors. *Eur J Public Health* 2018 [Epub ahead of print]. doi: 10.1093/eurpub/cky078.
19. Sdoná E, Papamichail D, Ragkou E, Briana DD, Malamitsi-Puchner A, Panagiotopoulos T. Greek economic crisis and impaired perinatal parameters: experience from a public

- 1  
2  
3 maternity hospital. *J Matern Fetal Neonatal Med* 2018;31:2371-5.  
4  
5 doi:10.1080/14767058.2017.1342803.  
6  
7 20. Michas G, Varytimiadi A, Chasiotis I, Micha R. Maternal and child mortality in Greece.  
8  
9 *Lancet* 2014;383:691-2. doi:10.1016/S0140-6736(14)60251-8.  
10  
11  
12 21. Filippidis F, Gerovasili V, Millett C, Tountas Y. Medium-term impact of the economic crisis  
13  
14 on mortality, health-related behaviours and access to healthcare in Greece. *Sci Rep*  
15  
16 2017;7:46423. doi:10.1038/srep46423.  
17  
18  
19 22. Kim HJ, Fay MP, Feuer EJ, Midthune DN. Permutation tests for joinpoint regression with  
20  
21 applications to cancer rates. *Stat Med* 2000;19:335-51. PMID:10649300  
22  
23  
24 23. Simou E, Koutsogeorgou E. Effects of the economic crisis on health and healthcare in  
25  
26 Greece in the literature from 2009 to 2013: a systematic review. *Health Policy* 2014;115:111-  
27  
28 9. doi: 10.1016/j.healthpol.2014.02.002.  
29  
30  
31 24. Petridou ET, Georgakis MK, Erdmann F, et al. Advanced parental age as risk factor for  
32  
33 childhood acute lymphoblastic leukemia: results from studies of the Childhood Leukemia  
34  
35 International Consortium. *Eur J Epidemiol* 2018. doi:10.1007/s10654-018-0402-z. [Epub  
36  
37 ahead of print].  
38  
39  
40 25. Bernal JL, Cummins S, Gasparrini A. Interrupted time series regression for the evaluation  
41  
42 of public health interventions: a tutorial. *Int J Epidemiol* 2017;46(1):348-55. doi:  
43  
44 10.1093/ije/dyw098.  
45  
46  
47 26. Gissler M, Alexander S, MacFarlane A, et al. Stillbirths and infant deaths among migrants  
48  
49 in industrialized countries. *Acta Obstet Gynecol Scand* 2009;88:134-48.  
50  
51  
52 doi:10.1080/00016340802603805.  
53  
54  
55 27. Gagnon AJ, Zimbeck M, Zeitlin J, et al. Migration to western industrialized countries and  
56  
57 perinatal health: a systematic review. *Soc Sci Med* 2009;69:934-46.  
58  
59  
60 doi:10.1016/j.socscimed.2009.06.027.

- 1  
2  
3 28. Wanigaratne S, Cole DC, Bassil K, et al. Severe Neonatal Morbidity Among Births to  
4  
5 Refugee Women. *Matern Child Health J* 2016;20:2189-98. doi:10.1007/s10995-016-2047-4.  
6  
7  
8 29. Puthussery S. Perinatal outcomes among migrant mothers in the United Kingdom: Is it a  
9  
10 matter of biology, behaviour, policy, social determinants or access to health care? *Best Pract*  
11  
12 *Res Clin Obstet Gynaecol* 2016;32:39-49. doi:10.1016/j.bpobgyn.2015.09.003.  
13  
14  
15 30. Wanner P, Bollini P. The contribution of the foreign population to the high level of infant  
16  
17 mortality in Switzerland: a demographic analysis. *BMC Pregnancy Childbirth* 2017;17:151.  
18  
19 doi:10.1186/s12884-017-1332-6.  
20  
21  
22 31. Cantarutti A, Franchi M, Monzio Compagnoni M, Merlino L, Corrao G. Mother's  
23  
24 education and the risk of several neonatal outcomes: an evidence from an Italian  
25  
26 population-based study. *BMC Pregnancy Childbirth* 2017;17:221. doi:10.1186/s12884-017-  
27  
28 1418-1.  
29  
30  
31 32. Bollini P, Pampallona S, Wanner P, Kupelnick B. Pregnancy outcome of migrant women  
32  
33 and integration policy: a systematic review of the international literature. *Soc Sci Med*  
34  
35 2009;68:452-61. doi:10.1016/j.socscimed.2008.10.018.  
36  
37  
38 33. Gotsens M, Malmusi D, Villarroel N, et al. Health inequality between immigrants and  
39  
40 natives in Spain: the loss of the healthy immigrant effect in times of economic crisis. *Eur J*  
41  
42 *Public Health* 2015;25:923-9. doi:10.1093/eurpub/ckv126.  
43  
44  
45 34. Nybo Andersen AM, Gundlund A, Villadsen SF. Stillbirth and congenital anomalies in  
46  
47 migrants in Europe. *Best Pract Res Clin Obstet Gynaecol* 2016;32:50-9.  
48  
49 doi:10.1016/j.bpobgyn.2015.09.004.  
50  
51  
52 35. Di Renzo GC, Tosto V, Giardina I. The biological basis and prevention of preterm birth.  
53  
54 *Best Pract Res Clin Obstet Gynaecol* 2018. doi:10.1016/j.bpobgyn.2018.01.022. [Epub ahead  
55  
56 of print].  
57  
58  
59  
60

- 1  
2  
3 36. Wanigaratne S, Cole DC, Bassil K, Hyman I, Moineddin R, Urquia ML. The influence of  
4  
5 refugee status and secondary migration on preterm birth. *J Epidemiol Community Health*  
6  
7 2016;70:622-8. doi:10.1136/jech-2015-206529.  
8  
9  
10 37. Kirby RS. Perinatal outcomes and nativity: does place of birth really influence infant  
11  
12 health? *Birth* 2011;38:354-6. doi:10.1111/j.1523-536X.2011.00505.x.  
13  
14  
15 38. Sdoná E, Papamichail D, Ragkou E, et al. Migration status and perinatal parameters in a  
16  
17 Greek public maternity hospital: an illustration of the "healthy immigrant effect". *J Matern*  
18  
19 *Fetal Neonatal Med* 2017. doi: 10.1080/14767058.2017.1371131. [Epub ahead of print].  
20  
21  
22 39. Eurostat, "Emigration by age group, sex and citizenship".  
23  
24 [http://appsso.eurostat.ec.europa.eu/nui/show.do?dataset=migr\\_emi1ctz&lang=en](http://appsso.eurostat.ec.europa.eu/nui/show.do?dataset=migr_emi1ctz&lang=en) (last  
25  
26 updated: 04/04/2018).  
27  
28  
29 40. Cavounidis J. The changing face of emigration: Harnessing the potential of the New  
30  
31 Greek Diaspora. Washington, DC: Migration Policy Institute, 2015.  
32  
33  
34 41. Vrachnis N, Vlachadis N, Iliodromiti Z, Vlachadi M, Creatsas G. Greece's birth rates and  
35  
36 the economic crisis. *Lancet* 2014;383:692-3. doi: 10.1016/S0140-6736(14)60252-X.  
37  
38  
39 42. Eurostat, "Fertility indicators". [http://appsso.eurostat.ec.europa.eu/nui/show.](http://appsso.eurostat.ec.europa.eu/nui/show.do?dataset=demo_find&lang=en)  
40  
41 [do?dataset=demo\\_find&lang=en](http://appsso.eurostat.ec.europa.eu/nui/show.do?dataset=demo_find&lang=en) (last updated: 20/09/2018)  
42  
43  
44 43. Karanikolos M, Mladovsky P, Cylus J, et al. Financial crisis, austerity, and health in  
45  
46 Europe. *Lancet* 2013;381:1323-31. doi:10.1016/S0140-6736(13)60102-6.  
47  
48  
49 44. Burki T. Health under austerity in Greece. *Lancet* 2018;391:525-6. doi:10.1016/S0140-  
50  
51 6736(18)30242-3.  
52  
53  
54 45. Ely DM, Driscoll AK, Mathews TJ. Infant mortality rates in rural and urban areas in the  
55  
56 United States, 2014. *NCHS data brief*, No 285. Hyattsville, MD: National Center for Health  
57  
58 Statistics, 2017.  
59  
60

- 1  
2  
3 46. Van de Poel E, O'Donnell O, Van Doorslaer E. What explains the rural-urban gap in infant  
4 mortality: household or community characteristics? *Demography* 2009;46:827-50.  
5  
6 doi:org/10.1353/dem.0.0074.  
7  
8  
9  
10 47. Harris DE, Aboueissa AM, Baugh N, Sarton C. Impact of rurality on maternal and infant  
11 health indicators and outcomes in Maine. *Rural Remote Health* 2015;15:3278.  
12  
13  
14 48. Heron M. Deaths: Leading Causes for 2015. *Natl Vital Stat Rep* 2017;66:1-76.  
15  
16  
17 49. Roncancio CP, Misnaza SP, Peña IC, Prieto FE, Cannon MJ, Valencia D. Trends and  
18 characteristics of fetal and neonatal mortality due to congenital anomalies, Colombia 1999-  
19 2008. *J Matern Fetal Neonatal Med* 2018;31:1748-55. doi:10.1080/14767058.2017.1326901.  
20  
21  
22  
23 50. Lehtonen L, Gimeno A, Parra-Llorca A, Vento M. Early neonatal death: A challenge  
24 worldwide. *Semin Fetal Neonatal Med* 2017;22:153-60. doi:10.1016/j.siny.2017.02.006.  
25  
26  
27  
28 51. Alexander M, Harding M, Lamarche C. Quantifying the impact of economic crises on  
29 infant mortality in advanced economies. *Applied Economics* 2011; 43: 3313–23.  
30  
31  
32  
33  
34  
35  
36  
37 52. Kotsiou OS, Kotsios P, Srivastava DS, Kotsios V, Gourgoulisanis KI, Exadaktylos AK. Impact  
38 of the Refugee Crisis on the Greek Healthcare System: A Long Road to Ithaca. *Int J Environ*  
39  
40  
41  
42  
43  
44  
45  
46  
47  
48  
49  
50  
51  
52  
53  
54  
55  
56  
57  
58  
59  
60

**Contributors:** EP and GC were involved in the initial conception of the study. All authors contributed to the design, analysis and interpretation of data. TS, ND and EP developed the first draft of the manuscript and all authors critically revised it and approved the final version. ND, AA and CM performed the statistical analyses; EE reviewed statistics and contributed significantly for ITS analyses. All authors agree to be accountable for all aspects of the work in ensuring that questions related to the accuracy or integrity of any part of the

1  
2 work are appropriately investigated and resolved. The corresponding author ensures that all  
3  
4 the journal's administrative requirements are properly completed.  
5  
6  
7  
8  
9

10 **Acknowledgements:** ELSTAT has provided individual anonymized data.  
11  
12  
13  
14

15 **Data sharing:** Data are available upon request from ELSTAT  
16  
17

18 (<http://www.statistics.gr/el/statistical-data-request>)  
19  
20  
21  
22

### 23 **Funding Statement**

24  
25 This research received no specific grant from any funding agency in the public, commercial  
26  
27 or not-for-profit sectors'  
28  
29  
30  
31

### 32 **Competing interests statement**

33  
34 All authors have completed the ICMJE uniform disclosure form at  
35  
36 [www.icmje.org/coi\\_disclosure.pdf](http://www.icmje.org/coi_disclosure.pdf) and declare: no support from any organization for the  
37  
38 submitted work; no financial relationships with any organizations that might have an interest  
39  
40 in the submitted work in the previous three years; no other relationships or activities that  
41  
42 could appear to have influenced the submitted work.  
43  
44  
45  
46  
47  
48  
49  
50  
51  
52  
53  
54  
55  
56  
57  
58  
59  
60

## Figure Legends

**Figure 1.** Evolution of Infant Early, Late and Post Neonatal Mortality Rates in Greece (2004-2016) overall and by maternal nationality

**Figure 2.** Interrupted Time Series analyses for evolution of infant (IMR), early (ENMR), late (LNMR) and post neonatal mortality rates (PNMR) in alternative prespecified years of interest (2008, 2010 and 2012) in infants born to Greek mothers.

**Figure 3.** Interrupted Time Series analyses for evolution of infant (IMR), early (ENMR), late (LNMR) and post neonatal mortality rates (PNMR) in alternative prespecified years of interest (2008, 2010 and 2012) in infants born to non-Greek mothers.

**Table 1.** Livebirths, infant deaths, total infant mortality rates (IMR) per 1000 livebirths in infants born to Greek and non-Greek mothers, and Human Development Index (HDI), in Greece during the period 2004-2016.

| Year | Infants born to Greek mothers |                   |                                 | Infants born to non-Greek mothers |                   |                                 | HDI   |
|------|-------------------------------|-------------------|---------------------------------|-----------------------------------|-------------------|---------------------------------|-------|
|      | Livebirths (N)                | Infant deaths (N) | Mortality Rates/1000 livebirths | Livebirths (N)                    | Infant deaths (N) | Mortality Rates/1000 livebirths |       |
| 2004 | 88805                         | 403               | 4.5                             | 16825                             | 26                | 1.5                             | 0.835 |
| 2005 | 89819                         | 383               | 4.3                             | 17678                             | 26                | 1.5                             | 0.845 |
| 2006 | 92590                         | 379               | 4.1                             | 19396                             | 36                | 1.9                             | 0.851 |
| 2007 | 91462                         | 359               | 3.9                             | 20412                             | 38                | 1.9                             | 0.849 |
| 2008 | 96329                         | 281               | 2.9                             | 21931                             | 32                | 1.5                             | 0.857 |
| 2009 | 95640                         | 307               | 3.2                             | 22244                             | 58                | 2.6                             | 0.858 |
| 2010 | 93209                         | 355               | 3.8                             | 21351                             | 80                | 3.7                             | 0.856 |
| 2011 | 87445                         | 282               | 3.2                             | 18680                             | 74                | 4.0                             | 0.852 |
| 2012 | 84868                         | 241               | 2.8                             | 15153                             | 52                | 3.4                             | 0.854 |
| 2013 | 80938                         | 292               | 3.6                             | 13063                             | 53                | 4.1                             | 0.856 |
| 2014 | 79985                         | 298               | 3.7                             | 12144                             | 47                | 3.9                             | 0.864 |
| 2015 | 79919                         | 320               | 4.0                             | 11919                             | 44                | 3.7                             | 0.866 |
| 2016 | 80166                         | 338               | 4.2                             | 12721                             | 49                | 3.9                             | 0.868 |

\*excluding missing maternal nationality values



**Table 2.** Poisson regression derived changes and 95% Confidence Intervals (CI) of infant (IMR), early (ENMR), late (LNMR) and post neonatal mortality rates (PNMR) in time periods with available data: Annual Percent of Change (APC) for place of residence (2004-2014) and maternal nationality (2004-2016); Percept of Change (PC) for 1 Standard Deviation of Human Development Index (HDI, 2004-2016) controlling for year of birth.

| Variable             | IMR  |                           |                  | ENMR |                            |                  | LNMR |                          |              | PNMR |                            |              |
|----------------------|------|---------------------------|------------------|------|----------------------------|------------------|------|--------------------------|--------------|------|----------------------------|--------------|
|                      | N    | APC (95% CI)              | p-value          | N    | APC (95% CI)               | p-value          | N    | APC (95% CI)             | p-value      | N    | APC (95% CI)               | p-value      |
| Maternal nationality |      |                           |                  |      |                            |                  |      |                          |              |      |                            |              |
| Greek                | 4238 | <b>-0.9 (-1.7, -0.1)</b>  | <b>0.02</b>      | 1849 | -0.6 (-1.8, 0.7)           | 0.35             | 995  | -0.6 (-2.3, 1.1)         | 0.46         | 1393 | <b>-1.6 (-3.0, -0.2)</b>   | <b>0.02</b>  |
| Non-Greek            | 615  | <b>9.4 (6.9, 11.9)</b>    | <b>&lt;.0001</b> | 258  | <b>12.5 (8.6, 16.5)</b>    | <b>&lt;.0001</b> | 138  | <b>8.0 (3.1, 13.2)</b>   | <b>0.001</b> | 218  | <b>4.4 (0.6, 8.4)</b>      | <b>0.02</b>  |
| All*                 | 4862 | 0.3 (-0.5, 1.0)           | 0.50             | 2107 | 0.9 (-0.3, 2.1)            | 0.13             | 1136 | 0.4 (-1.2, 2.0)          | 0.65         | 1617 | -0.9 (-2.2, 0.5)           | 0.20         |
| Urbanization         |      |                           |                  |      |                            |                  |      |                          |              |      |                            |              |
| Urban-Semi urban     |      |                           |                  |      |                            |                  |      |                          |              |      |                            |              |
| Greek                | 3305 | <b>-3.5 (-4.6, -2.4)</b>  | <b>&lt;.0001</b> | 1476 | <b>-4.1 (-5.7, -2.5)</b>   | <b>&lt;.0001</b> | 781  | <b>-2.7 (-4.9, -0.5)</b> | <b>0.02</b>  | 1048 | <b>-3.3 (-5.2, -1.4)</b>   | <b>0.001</b> |
| Non-Greek            | 494  | <b>13.3 (9.9, 16.9)</b>   | <b>&lt;.0001</b> | 208  | <b>19.4 (13.7, 25.3)</b>   | <b>&lt;.0001</b> | 110  | <b>11.2 (4.2, 18.6)</b>  | <b>0.001</b> | 176  | <b>8.2 (2.8, 13.8)</b>     | <b>0.002</b> |
| Any*                 | 3807 | <b>-1.6 (-2.6, -0.6)</b>  | <b>0.002</b>     | 1684 | <b>-1.7 (-3.2, -0.1)</b>   | <b>0.03</b>      | 894  | -1.2 (-3.3, 0.9)         | 0.27         | 1229 | <b>-1.8 (-3.6, 0.0)</b>    | <b>0.05</b>  |
| Rural                |      |                           |                  |      |                            |                  |      |                          |              |      |                            |              |
| Greek                | 275  | <b>5.2 (1.3, 9.3)</b>     | <b>0.01</b>      | 69   | <b>24.1 (14.2, 34.8)</b>   | <b>&lt;.0001</b> | 62   | 4.6 (-3.4, 13.3)         | 0.27         | 144  | -2.0 (-7.1, 3.3)           | 0.44         |
| Non-Greek            | 22   | -6.9 (-19.4, 7.5)         | 0.33             | 7    | 14.8 (-8.0, 43.3)          | 0.22             | 3    | -1.9 (-34.7, 47.4)       | 0.93         | 12   | -12.4 (-32.0, 12.9)        | 0.31         |
| All*                 | 298  | <b>4.3 (0.6, 8.2)</b>     | <b>0.02</b>      | 76   | <b>24.4 (14.8, 34.7)</b>   | <b>&lt;.0001</b> | 65   | 3.6 (-4.2, 12.1)         | 0.38         | 157  | -3.4 (-8.2, 1.6)           | 0.18         |
| HDI                  |      |                           |                  |      |                            |                  |      |                          |              |      |                            |              |
| PC                   |      |                           | PC               |      |                            | PC               |      |                          | PC           |      |                            |              |
| Greek                |      | <b>-8.6 (-14.8, -1.9)</b> | <b>0.01</b>      |      | <b>-11.3 (-20.8, -1.4)</b> | <b>0.03</b>      |      | 3.5 (-10.9, 20.1)        | 0.66         |      | <b>-12.3 (-22.2, -1.2)</b> | <b>0.03</b>  |
| Non-Greek            |      | -5.7 (-25.0, 18.7)        | 0.62             |      | -19.8 (-44.8, 16.6)        | 0.25             |      | 20.0 (-28.6, 101.7)      | 0.49         |      | -1.3 (-30.7, 40.5)         | 0.94         |
| All*                 |      | <b>-9.5 (15.3, -3.2)</b>  | <b>0.004</b>     |      | <b>-14.0 (-22.3, -4.7)</b> | <b>0.004</b>     |      | 3.3 (-10.4, 19.3)        | 0.65         |      | <b>-11.4 (-20.8, -0.7)</b> | <b>0.04</b>  |

\*including missing maternal nationality values

**Table 3.** Joinpoint regression derived Annual Percent of Change (APC) and 95% Confidence Intervals (CI) of infant (IMR) and early neonatal mortality rates (ENMR) by maternal nationality (only for indices showing breaks in the time period examined).

| Variable  | Years   | N    | IMR<br>APC (95% CI) | p-value | Time period | N    | ENMR<br>APC (95% CI) | p-value |
|-----------|---------|------|---------------------|---------|-------------|------|----------------------|---------|
| Greek     | 2004-12 | 2870 | -4.5 (-7.6, -1.3)   | 0.01    | 2004-11     | 1118 | -6.5 (-11.4, -1.4)   | 0.02    |
|           | 2012-16 | 1368 | 9.3 (-1.1, 20.9)    | 0.07    | 2011-16     | 731  | 10.2 (-0.4, 21.9)    | 0.06    |
| Non-Greek | 2004-11 | 333  | 17.1 (8.1, 26.9)    | 0.002   |             |      |                      |         |
|           | 2011-16 | 282  | 0.2 (-11.5, 13.5)   | 0.97    |             |      |                      |         |
| All*      | 2004-08 | 1807 | -7.5 (-14.6, 0.3)   | 0.06    | 2004-08     | 780  | -10.7 (-19.9, -0.5)  | 0.04    |
|           | 2008-16 | 3055 | 3.6 (0.7, 6.6)      | 0.02    | 2008-16     | 1327 | 6.1 (2.1, 10.3)      | 0.01    |

\* Including missing maternal nationality values

1  
2  
3  
4  
5  
6  
7  
8  
9  
10  
11  
12  
13  
14  
15  
16  
17  
18  
19  
20  
21  
22  
23  
24  
25  
26  
27  
28  
29  
30  
31  
32  
33  
34  
35  
36  
37  
38  
39  
40  
41  
42  
43  
44  
45  
46

For peer review only

1  
2  
3  
4  
5  
6  
7  
8  
9  
10  
11  
12  
13  
14  
15  
16  
17  
18  
19  
20  
21  
22  
23  
24  
25  
26  
27  
28  
29  
30  
31  
32  
33  
34  
35  
36  
37  
38  
39  
40  
41  
42  
43  
44  
45  
46  
47  
48  
49  
50  
51  
52  
53  
54  
55  
56  
57  
58  
59  
60

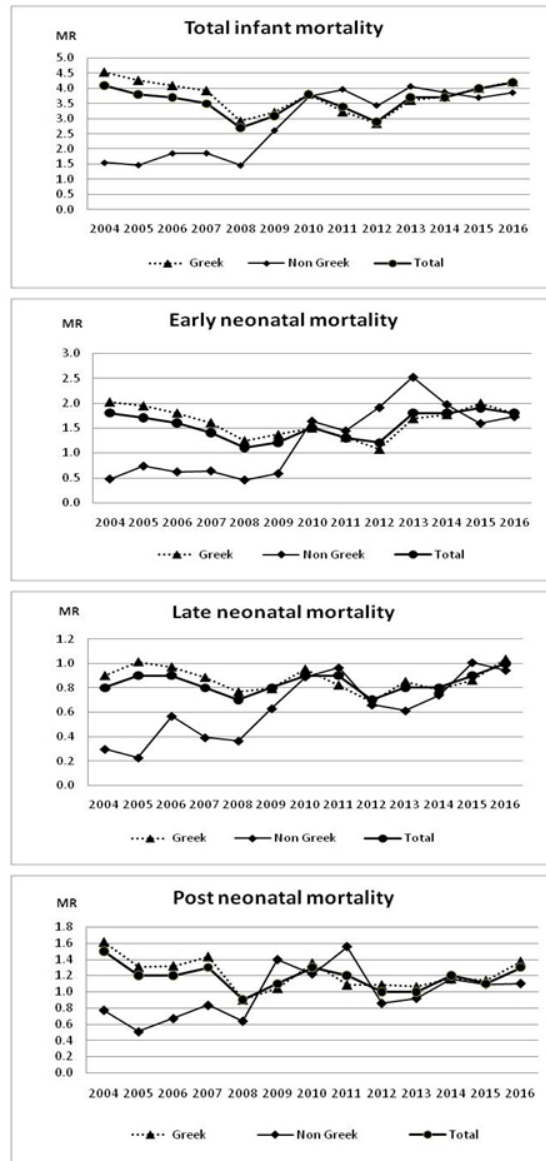

Evolution of Infant Early, Late and Post Neonatal Mortality Rates in Greece (2004-2016) overall and by maternal nationality

60x81mm (300 x 300 DPI)



Interrupted Time Series analyses for evolution of infant (IMR), early (ENMR), late (LNMR) and post neonatal mortality rates (PNMR) in alternative prespecified years of interest (2008, 2010 and 2012) in infants born to Greek mothers.

140x198mm (300 x 300 DPI)

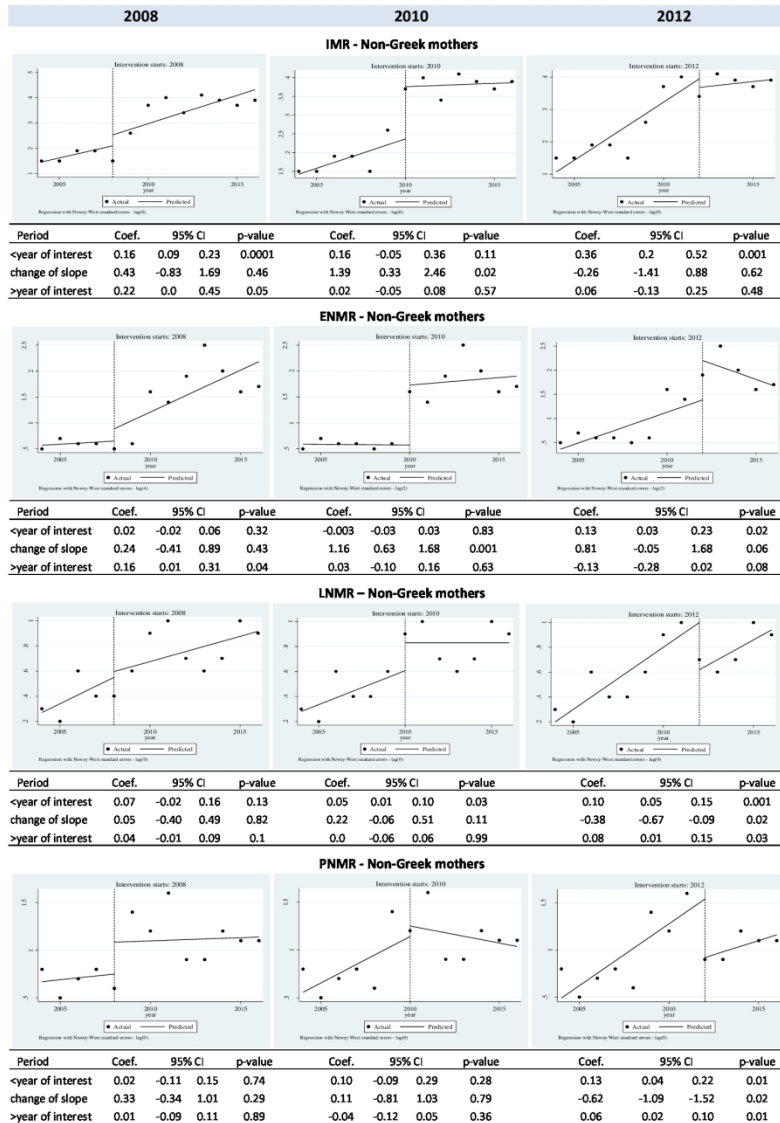

Interrupted Time Series analyses for evolution of infant (IMR), early (ENMR), late (LNMR) and post neonatal mortality rates (PNMR) in alternative prespecified years of interest (2008, 2010 and 2012) in infants born to non-Greek mothers.

140x198mm (300 x 300 DPI)

**Suppl. Table 1.** Infant deaths and total infant mortality rates (IMR) by place of residence (2004-2014).

| Year | Infants born to mothers living in urban/semiurban areas |                                 | Infants born to mothers living in rural areas |                                 |
|------|---------------------------------------------------------|---------------------------------|-----------------------------------------------|---------------------------------|
|      | Infant deaths (N)                                       | Mortality rates/1000 livebirths | Infant deaths (N)                             | Mortality rates/1000 livebirths |
| 2004 | 400                                                     | 4.5                             | 29                                            | 1.8                             |
| 2005 | 383                                                     | 4.2                             | 26                                            | 1.6                             |
| 2006 | 382                                                     | 4.0                             | 33                                            | 1.9                             |
| 2007 | 377                                                     | 3.9                             | 20                                            | 1.2                             |
| 2008 | 298                                                     | 2.9                             | 16                                            | 0.9                             |
| 2009 | 344                                                     | 3.4                             | 27                                            | 1.5                             |
| 2010 | 403                                                     | 4.1                             | 33                                            | 1.9                             |
| 2011 | 326                                                     | 3.5                             | 31                                            | 2.2                             |
| 2012 | 276                                                     | 3.2                             | 17                                            | 1.3                             |
| 2013 | 334                                                     | 4.2                             | 11                                            | 0.8                             |
| 2014 | 284                                                     | 3.6                             | 55                                            | 3.9                             |

1  
2  
3  
4  
5  
6  
7  
8  
9  
10  
11  
12  
13  
14  
15  
16  
17  
18  
19  
20  
21  
22  
23  
24  
25  
26  
27  
28  
29  
30  
31  
32  
33  
34  
35  
36  
37  
38  
39  
40  
41  
42  
43  
44  
45  
46  
47  
48  
49  
50  
51  
52  
53  
54  
55  
56  
57  
58  
59  
60

## Research checklist- STROBE Statement—checklist

|                           | Item No | Page number |
|---------------------------|---------|-------------|
| <b>Title and abstract</b> | 1       | 1           |
|                           |         | 3           |
| <b>Introduction</b>       |         |             |
| Background/rationale      | 2       | 6-7         |
| Objectives                | 3       | 7           |
| <b>Methods</b>            |         |             |
| Study design              | 4       | 7-9         |
| Setting                   | 5       | 7           |
| Participants              | 6       | 7-8         |
| Variables                 | 7       | 7-9         |
| Data sources/ measurement | 8*      | 7-9         |
| Bias                      | 9       | N/A         |
| Study size                | 10      | N/A         |
| Quantitative variables    | 11      | 7-9         |
| Statistical methods       | 12      | 8-9         |
| <b>Results</b>            |         |             |
| Participants              | 13*     | 9-10        |
| Descriptive data          | 14*     | 9-10        |
| Outcome data              | 15*     | 9-12        |
| Main results              | 16      | 9-12        |
| Other analyses            | 17      | N/A         |
| <b>Discussion</b>         |         |             |
| Key results               | 18      | 12          |
| Limitations               | 19      | 12-13       |
| Interpretation            | 20      | 14-18       |
| Generalisability          | 21      | 17-18       |
| <b>Other information</b>  |         |             |
| Funding                   | 22      | 25          |



# BMJ Open

## Disparities of infant and neonatal mortality trends in Greece during the years of economic crisis by ethnicity, place of residence and human development index: a nationwide population study

|                                 |                                                                                                                                                                                                                                                                                                                                                                                                                                                                                                                                                                                                                                                                                                                                                                                                                                                                                                                                                                                                                                               |
|---------------------------------|-----------------------------------------------------------------------------------------------------------------------------------------------------------------------------------------------------------------------------------------------------------------------------------------------------------------------------------------------------------------------------------------------------------------------------------------------------------------------------------------------------------------------------------------------------------------------------------------------------------------------------------------------------------------------------------------------------------------------------------------------------------------------------------------------------------------------------------------------------------------------------------------------------------------------------------------------------------------------------------------------------------------------------------------------|
| Journal:                        | <i>BMJ Open</i>                                                                                                                                                                                                                                                                                                                                                                                                                                                                                                                                                                                                                                                                                                                                                                                                                                                                                                                                                                                                                               |
| Manuscript ID                   | bmjopen-2018-025287.R3                                                                                                                                                                                                                                                                                                                                                                                                                                                                                                                                                                                                                                                                                                                                                                                                                                                                                                                                                                                                                        |
| Article Type:                   | Research                                                                                                                                                                                                                                                                                                                                                                                                                                                                                                                                                                                                                                                                                                                                                                                                                                                                                                                                                                                                                                      |
| Date Submitted by the Author:   | 30-May-2019                                                                                                                                                                                                                                                                                                                                                                                                                                                                                                                                                                                                                                                                                                                                                                                                                                                                                                                                                                                                                                   |
| Complete List of Authors:       | Siahanidou, Tania; First Department of Pediatrics, National and Kapodistrian University of Athens, School of Medicine<br>Dessypris, Nick; Department of Hygiene, Epidemiology and Medical Statistics, School of Medicine, National & Kapodistrian University of Athens<br>Analitis, Antonis; Department of Hygiene, Epidemiology and Medical Statistics, School of Medicine, National & Kapodistrian University of Athens<br>Mihas, Constantinos; Department of Hygiene, Epidemiology and Medical Statistics, School of Medicine, National and Kapodistrian University of Athens<br>Evangelou, Evangelos; Dept of Hygiene and Epidemiology; Department of Epidemiology and Biostatistics, Imperial College<br>Chrousos, George; First Department of Pediatrics, National and Kapodistrian University of Athens, School of Medicine<br>PETRIDOU, ELENI; Department of Hygiene, Epidemiology and Medical Statistics, School of Medicine, National & Kapodistrian University of Athens; Clinical Epidemiology Unit, Karolinska Institute, 171 77 |
| <b>Primary Subject Heading</b>: | Paediatrics                                                                                                                                                                                                                                                                                                                                                                                                                                                                                                                                                                                                                                                                                                                                                                                                                                                                                                                                                                                                                                   |
| Secondary Subject Heading:      | Epidemiology, Public health, Health policy, Global health                                                                                                                                                                                                                                                                                                                                                                                                                                                                                                                                                                                                                                                                                                                                                                                                                                                                                                                                                                                     |
| Keywords:                       | Neonates, Mortality rates, Infant deaths, perinatal care, financial crisis                                                                                                                                                                                                                                                                                                                                                                                                                                                                                                                                                                                                                                                                                                                                                                                                                                                                                                                                                                    |
|                                 |                                                                                                                                                                                                                                                                                                                                                                                                                                                                                                                                                                                                                                                                                                                                                                                                                                                                                                                                                                                                                                               |

SCHOLARONE™  
Manuscripts

1  
2  
3 **Disparities of infant and neonatal mortality trends in Greece during the years of economic**  
4 **crisis by ethnicity, place of residence and human development index: a nationwide**  
5 **population study**  
6  
7  
8  
9

10  
11  
12 Tania Siahaniidou, Nick Dessypris, Antonis Analitis, Constantinos Mihas, Evangelos Evangelou,  
13  
14 George Chrousos, Eleni Th Petridou  
15

16  
17  
18  
19 First Department of Pediatrics, School of Medicine, National and Kapodistrian University of  
20  
21 Athens, 11527 Athens, Greece  
22

23  
24 Tania Siahaniidou  
25

26  
27 Associate Professor in Pediatrics-Neonatology  
28

29  
30 Department of Hygiene, Epidemiology and Medical Statistics, School of Medicine, National  
31  
32 and Kapodistrian University of Athens, 11527 Athens, Greece  
33

34  
35 Nick Dessypris  
36

37  
38 Research Associate  
39

40  
41 Department of Hygiene, Epidemiology and Medical Statistics, School of Medicine, National  
42  
43 and Kapodistrian University of Athens, 11527 Athens, Greece  
44

45  
46 Antonis Analitis  
47

48  
49 Research Associate  
50

51  
52 Department of Hygiene, Epidemiology and Medical Statistics, School of Medicine, National  
53  
54 and Kapodistrian University of Athens, 11527 Athens, Greece  
55

56  
57 Constantinos Mihas  
58

59  
60 MD General Medicine, Research Associate

1  
2 Department of Hygiene and Epidemiology, University of Ioannina Medical School, Ioannina,  
3  
4 Greece and Department of Epidemiology and Biostatistics, Imperial College London, London,  
5  
6  
7 UK

8  
9  
10 Evangelos Evangelou

11  
12 Assistant Professor of Clinical and Molecular Epidemiology

13  
14  
15 First Department of Pediatrics, School of Medicine, National and Kapodistrian University of  
16  
17 Athens, 11527 Athens, Greece

18  
19  
20 George Chrousos

21  
22  
23 Professor of Pediatrics

24  
25  
26 Department of Hygiene, Epidemiology and Medical Statistics, School of Medicine, National  
27  
28 and Kapodistrian University of Athens, Athens 11527, Greece & Clinical Epidemiology Unit,  
29  
30 Karolinska Institute, 171 77, Stockholm, Sweden

31  
32  
33 Eleni Th Petridou

34  
35  
36 Professor of Preventive Medicine & Epidemiology

37  
38  
39  
40  
41 **Correspondence to:** Tania Sihanidou; [sihan@med.uoa.gr](mailto:sihan@med.uoa.gr)

**ABSTRACT****OBJECTIVE**

To study trends of infant (IMR) and neonatal mortality rate in Greece during the period 2004-2016 and explore the role of sociodemographic factors in the years of crisis.

**DESIGN**

Nationwide individual data for livebirths and infant (0-11 months) deaths provided by the Hellenic Statistical Authority were examined using Poisson, joinpoint regression and Interrupted Time Series (ITS) analyses.

**SETTING**

Greece

**PARTICIPANTS**

All infant deaths (n=4862) over the 13-year period, of which 87.2% were born to Greek mothers, and respective livebirths.

**MAIN OUTCOME MEASURES**

Evolution of IMR (0-364 days), early (<7 days/ENMR), late (7-27 days/LNMR) neonatal and post neonatal (28-364 days/PNMR) mortality trends, by maternal nationality, place of residence and Human Development Index (HDI).

**RESULTS**

By Poisson regression, overall, during the study-period, among infants of Greek mothers, IMR and PNMR declined significantly (-0.9%; 95% CI -1.7% to -0.1% and -1.6%; -3.0% to -0.2% annually, respectively), albeit differentially by place of residence (IMR<sub>urban</sub>: -2.1%; -2.9% to -1.3%, IMR<sub>rural</sub>: +10.6%; 7.6% to 13.6%). By contrast, among infants of non-Greek mothers, the low starting IMR/ENMR/LNMR/PNMR increased significantly (max ENMR: +12.5%; 8.6% to 16.5%) leading to a non-significant time-trend pattern overall in Greece. The inverse associations of HDI with IMR, ENMR and PNMR were restricted to Greek mothers' infants.

1  
2  
3 Joinpoint regression analyses among Greek mothers' infants indicated non-significant  
4  
5 increasing trends of IMR and ENMR following the crisis (+9.3%, 2012-2016,  $p=0.07$  and  
6  
7 +10.2%, 2011-2016,  $p=0.06$ , respectively). By contrast, the high (+17.1%; 8.1% to 26.9%,  
8  
9  $p=0.002$ ) IMR increases among non-Greek infants were restricted to 2004-2011 and  
10  
11 equalized to those of Greek mothers' infants thereafter. ITS analyses in preset years (2008,  
12  
13 2010, 2012) identified significantly increasing trends in IMR, LNMR and PNMR after 2012,  
14  
15 and in ENMR after 2010, among Greek mothers' infants.  
16  
17  
18  
19

## 20 CONCLUSIONS

21  
22 HDI and rural residence were significantly associated with IMR. The strongly decreasing IMR  
23  
24 trends among Greek-mothers' infants were stagnated after a lag time of ~four years of crisis  
25  
26 approximating the previously sharply increasing trends among non-Greeks.  
27  
28  
29  
30  
31  
32  
33  
34

### 35 Strengths of this study

- 36  
37 • Longest follow-up period of national data, as contrasted to previously Greek-based  
38  
39 studies.
- 40  
41 • Maternal ethnicity is for first time considered in the analyses explaining part, if not  
42  
43 most, of the heterogeneity of trends through the study period.
- 44  
45 • Three complimentary statistical methodologies were used to describe the overall  
46  
47 evolution of infant mortality and its components.  
48  
49  
50  
51  
52  
53

### 54 Limitations

- 55  
56 • Absence of a linkage system between birth and death data.
- 57  
58 • Data on the role of biological factors or specific causes of infant death are missing.  
59  
60

1  
2  
3  
4  
5 **Abbreviations:**  
6

7 IM; infant mortality  
8

9  
10 IMR; infant mortality rates  
11

12 ENMR; early neonatal mortality rates  
13

14 LNMR; late neonatal mortality rates  
15

16 PNMR; post neonatal mortality rates  
17

18 HDI; Human Development Index  
19

20 ELSTAT; Hellenic Statistical Authority  
21

22 ITS; Interrupted Time Series  
23  
24  
25  
26  
27  
28  
29  
30  
31  
32  
33  
34  
35  
36  
37  
38  
39  
40  
41  
42  
43  
44  
45  
46  
47  
48  
49  
50  
51  
52  
53  
54  
55  
56  
57  
58  
59  
60

## Introduction

Socioeconomic factors have repeatedly been recognized as strong determinants of the health status of the population, including infants.<sup>1-3</sup> Economic indicators, such as the *per capita* Gross National Product, were suggested to be at least as important contributors of infant mortality (IM) as narrowly defined factors relating to provision of medical care, e.g. the relative number of doctors or hospital beds in a community.<sup>1</sup> Not surprisingly, the recent economic crisis of ~2008, has been linked with declines in population and child health reflected also by increased IM rates (IMR).<sup>4,5</sup> It is worth noting that in European Union countries, even a minor 1% cut in government healthcare spending was associated with significant increases in all mortality metrics, including neonatal and post neonatal IM.<sup>6</sup>

On the contrary, associations between the crisis and increased mortality have been questioned in other studies showing that most indicators of population health, apart from those relevant to suicides and mental health, continued improving after crisis initiation.<sup>7-10</sup> Moreover, the economic crisis has been associated with some beneficial effects, i.e. decline in rates of road traffic accidents, and smoking cessation.<sup>4,9</sup> Reasonably, the impact of the crisis on health depends on several factors including the duration and intensity of the recession, the level of health care achieved prior to the recession and the type of austerity measures applied, but also on the type of the population studied with the most vulnerable groups being disproportionately affected.<sup>4,11,12</sup> Due to the latter, it was proposed that studies should focus on analyzing separately the subgroups most influenced by the crisis instead of presenting results as averages in a population.<sup>4</sup>

Greece has been markedly affected and still suffering the recent economic crisis. Between 2008 and 2016, the country's GDP *per capita* dropped by 26%, unemployment rate increased by more than 200% (from 7.6% to 23.3%) and the median disposable income decreased by 35%.<sup>13,14</sup> The GINI index, which measures income inequality, increased by 22% and the

1  
2 proportion of individuals at risk of poverty or social exclusion climbed to almost 36% in 2016.  
3  
4  
5 Total health expenditures and government expenditure on health care were both decreased  
6  
7 by 34% per capita over the period 2008-2016,<sup>13,14</sup> whereas unmet healthcare needs  
8  
9 increased.<sup>15</sup> Besides, during the last years, Greece experienced large refugee flows<sup>16,17</sup> with  
10  
11 an anticipated negative impact on the country's economy and population health indicators.  
12  
13  
14 Adverse effects of financial crisis on perinatal factors, such as low birth weight, preterm birth  
15  
16 and stillbirth rates, have been also observed;<sup>18,19</sup> however, sparse data exist regarding the  
17  
18 potential association of the crisis with IMR. It has been initially reported that during the  
19  
20 period 2003-2012, IMR in Greece did not differ between the pre-crisis and crisis period  
21  
22 whereas, a later study showed that IMR increased between 2010 and 2015 as contrasted to  
23  
24 the steady decrease observed during the preceding decade.<sup>20,21</sup> Ecological correlations may  
25  
26 prone, however, to fallacies, whereas the different parts shaping the two main components  
27  
28 of IM, namely neonatal (NM) and post neonatal mortality (PNM), should have been distinctly  
29  
30 examined along with other factors possibly influencing the infants' health, especially  
31  
32 socioeconomic status and access to health care delivery.  
33  
34  
35 The aims of the current study were to explore time trends in early (<7 days of life) and late  
36  
37 (7-27 days) neonatal, post neonatal (28-364 days) and total IM (0-364 days) in Greece during  
38  
39 the period 2004-2016 after taking into account nationality and place of residence, as well as  
40  
41 changes in the Human Development Index (HDI) during the study period as a proxy of  
42  
43 individual and collective measures of socioeconomic impact and health care access.  
44  
45  
46  
47  
48  
49  
50  
51  
52  
53

## 54 **Materials and Methods**

55  
56 Following personal contact and a signed agreement, individual data for all livebirths and  
57  
58 infant (0-11 months) deaths were provided by the Hellenic Statistical Authority (ELSTAT) for  
59  
60 a 13-year period (2004-2016) in two separate files: one including live births and a second



1  
2 one, infant deaths; linkage of the two files was not possible as the personal identification  
3  
4 number was not available in ELSTAT. Information on maternal demographic characteristics,  
5  
6 such as nationality and place of residence, as well as on the infants' age at death, was also  
7  
8 provided.  
9

10  
11 Mortality rates were calculated for infant (IM), early neonatal (0-6 days) (ENM), late  
12  
13 neonatal (7-27 days) (LNM) and post neonatal (28-364 days) period (PNM) using respective  
14  
15 numbers of deaths over the number of livebirths per year. Annual percent of change (APC)  
16  
17 during the study period was initially estimated through univariate Poisson regression  
18  
19 analysis using the underlying population of each set as an offset variable. Subsequently, data  
20  
21 were stratified and analyzed by maternal nationality (Greek vs. non-Greek) and place of  
22  
23 residence (Urban/Semi-urban vs. Rural). Joinpoint regression analysis<sup>22</sup> was thereafter  
24  
25 applied to automatically derive, by a software program, different segments in the mortality  
26  
27 evolution curves overall, as well as those by maternal nationality and place of residence. In  
28  
29 details, the Joinpoint regression analysis is applied to study varying trends over time in order  
30  
31 to identify the time point(s) in which the trend significantly changes. The location of the  
32  
33 joinpoint is not known a priori and is to be estimated from the data. Therefore, the software  
34  
35 takes trend data (e.g. IM rates) and fits the simplest joinpoint model based on the data. The  
36  
37 user supplies the minimum and maximum number of joinpoints. The algorithm starts with  
38  
39 the minimum number of joinpoint (e.g. 0 joinpoints, which is a straight line) and tests  
40  
41 whether more joinpoints are statistically significant and must be added to the model (up to  
42  
43 that maximum number). Significance is tested using a Monte Carlo Permutation method. In  
44  
45 all models examined in this study, a minimum number of 0 joinpoints and a maximum one of  
46  
47 2 joinpoints were tested. Interrupted Time Series (ITS) analyses were also undertaken as a  
48  
49 sensitivity analysis to further explore the effect of crisis on IMR and its components in  
50  
51 alternative prespecified years, notably 2008, considered to indicate the initiation of the crisis  
52  
53  
54  
55  
56  
57  
58  
59  
60

1  
2  
3 in Greece -as the value of the Gross Domestic Product of the country was maximum at that  
4  
5 year but dropped afterwards (Source: Aggregate National Accounts)-, and in two successive  
6  
7 periods two years apart (2010 and 2012), to control for possible time lags in observing the  
8  
9 impact of the crisis. All ITS models were verified and appropriately adjusted for possible  
10  
11 auto-correlation; autoregressive integrated moving - average models were used to control for  
12  
13 autocorrelation and to estimate treatment effects over multiple periods. In our ITS analysis a  
14  
15 slope “<year of interest” is fitted until the introduction of the crisis, “>year of interest”  
16  
17 represents the change in the level of the mortality immediately following the initiation of the  
18  
19 crisis and “change of slope” represents the differences between pre and post crisis intervention  
20  
21 slopes.  
22  
23  
24

25  
26 Human development index (HDI) is a summary measure of average achievements of a  
27  
28 country’s population in three areas including life expectancy, education and *per capita*  
29  
30 income indicators. Annual HDI values for the underlying populations in the year of death  
31  
32 were extracted from the United Nations Development Program website  
33  
34 (<http://hdr.undp.org/en/composite/HDI>), whereas Poisson regression analysis was used to  
35  
36 explore the association of one standard deviation of HDI with total IM and its components.  
37  
38 All statistical analyses were performed using the SAS software (V9.4, SAS Institute Inc.), Stata  
39  
40 software program, version 13 (StataCorp. 2013. Stata Statistical Software: Release 13.  
41  
42 College Station, TX: StataCorp LP) and Joinpoint Regression Program (Joinpoint Regression  
43  
44 Program, Version 4.5.0.1 - June 2017; Statistical Methodology and Applications Branch,  
45  
46 Surveillance Research Program, National Cancer Institute).

### 55 **Patient involvement**

56  
57 No patients were involved in setting the research question or the outcome measures, nor  
58  
59 were they involved in developing plans for design or implementation of the study. No  
60

1  
2 patients were asked to advise on interpretation or writing up of results. There are no plans  
3  
4 to disseminate the results of the research to study participants or the relevant patient  
5  
6 community.  
7  
8  
9

10  
11  
12 **Ethical approval:** Not required.  
13  
14  
15

## 16 17 **Results**

18  
19 The annual average number of livebirths during the study period was 105077, ranging from a  
20  
21 high 118302 (2008) to a low 91847 livebirths in 2015. The annual average proportion of  
22  
23 Greek mothers was 83.7%, whereas the remaining were mainly economic migrants. During  
24  
25 the period 2004-2016, a total of 4862 infant deaths were recorded of whom 4238 (87.2%)  
26  
27 were of infants born to Greek mothers, whereas among the remaining 615 deaths of infants  
28  
29 born to non-Greek mothers, 298 (48.5%) were of infants born to Albanian mothers, 146  
30  
31 (23.7%) of infants born to mothers from Balkan countries and countries of the former Soviet  
32  
33 Union, 77 (12.5%) from Asia, 47 (7.6%) from countries of the European Union or other  
34  
35 developed countries and 47 (7.6%) from Africa. During the early and late neonatal period,  
36  
37 2107 (43.3%) and 1136 (23.4%) deaths occurred, respectively, whereas another 1617  
38  
39 (33.3%) of deaths were recorded in the post neonatal period. The annual average IMR was  
40  
41 3.5 over 1000 livebirths, whereas the corresponding figures for the early, late and post  
42  
43 neonatal period were 1.5‰, 0.8‰ and 1.2‰ respectively. The number of livebirths and  
44  
45 infant deaths, total IMR per 1000 livebirths in infants born to Greek and non-Greek mothers,  
46  
47 as well as HDI values, in Greece, during the study period, are shown in Table 1. Moreover,  
48  
49 infant deaths and total infant mortality rates (IMR) by place of residence (Urban/Semi-urban  
50  
51 vs. Rural) are shown in Suppl. Table 1.  
52  
53  
54  
55  
56  
57  
58  
59  
60

1  
2  
3 Of note, in the beginning of the study period in 2004, notably well before the initiation of  
4  
5 the crisis, IMR and its components were 2- to 4-fold higher among infants born to Greek  
6  
7 mothers in comparison with rates in infants born to non-Greek origin mothers. During the  
8  
9 subsequent 4-5 years, however, rates among Greeks followed downward trends, whereas  
10  
11 among non-Greeks inflated reaching almost similar values to those observed in infants born  
12  
13 to Greek mothers (Figure 1).  
14  
15

16  
17 Overall, during the study-period, among infants born to Greek mothers, Poisson regression  
18  
19 analyses showed decreasing trends in IMR and PNMR (-0.9%; 95% CI -1.7% to -0.1% and -  
20  
21 1.6%; -3.0% to -0.2% annually, respectively,  $p=0.02$  for each), whereas no significant change  
22  
23 in ENMR and LNMR was observed (Table 2). Interestingly, mortality trends changed  
24  
25 differentially by place of residence; significant decline of IMR trends (-2.1%; -2.9% to -1.3%  
26  
27 annually,  $p<0.0001$ ) and all its components was observed among infants born to Greek  
28  
29 mothers living in urban areas whereas, among infants born to Greek mothers in rural areas,  
30  
31 a significant increase of IMR (+10.6%; 7.6% to 13.6% annually,  $p=0.002$ ), ENMR (+24.1%;  
32  
33 17.0% to 31.5% annually,  $p<0.0001$ ) and LNMR trend (+12.7%; 6.5% to 19.2% annually,  
34  
35  $p<0.0001$ ) was observed (Table 2). By contrast, among infants of non-Greek mothers, the  
36  
37 low starting IMR increased significantly (+9.4%; 6.9% to 11.9% annually,  $p<0.0001$ ), due to  
38  
39 significant increases of ENMR, LNMR and PNMR (max ENMR: +12.5%; 8.6% to 16.5%  
40  
41 annually,  $p<0.0001$ ) leading to a non-significant pattern of IMR evolution for Greece overall  
42  
43 ( $p=0.50$ ) (Table 2). Further analysis by nationality of non-Greek mothers showed significant  
44  
45 increases of IMR trends in all ethnic groups with average annual percent change 7.6% (95%  
46  
47 CI; 4.2% to 11.1%) in infants born to Albanian mothers, 8.6% (3.7% to 13.8%) in infants born  
48  
49 to mothers from Balkan countries and countries of the former Soviet Union, 9.4% (2.8% to  
50  
51 16.3%) in infants born to mothers from Asia, 9.4% (1.1% to 18.3%) in infants born to  
52  
53 mothers from countries of the European Union or other developed countries, and 21.1%  
54  
55  
56  
57  
58  
59  
60

1  
2  
3 (11.0% to 32.3%) in infants born to mothers from Africa. HDI trends increased significantly,  
4  
5 by 0.1% (95% CI 0.06% to 0.13%) annually, during the study period. Inverse associations of  
6  
7 HDI with IMR, ENMR and PNMR, restricted to Greek mothers' infants, were observed (Table  
8  
9  
10 2).

11  
12 In order to examine whether IMR, in our study population, might have influenced by any  
13  
14 variation in the registration of births in cases of uncertain viability, we analyzed separately  
15  
16 the infant deaths in the first day of life; trends of IMR in this age group, over the study  
17  
18 period, were non-significant (average annual percent change: -1.22%; 95% CI: -3.79% to  
19  
20 1.42%;  $p=0.36$ ).

21  
22  
23  
24 By joinpoint regression analyses, a break was identified in the IMR curve among infants born  
25  
26 to Greek mothers restricting the decreasing IMR trend to the period 2004-2012 (-4.5%; 95%  
27  
28 CI -7.6% to -1.3% annually,  $p=0.01$ ); a significant decline in ENMR trend till 2011 (-6.5%; 95%  
29  
30 CI -11.4% to -1.4% annually,  $p=0.02$ ) was also found (Table 3). Of note, however, in the most  
31  
32 recent study period following the crisis, non-significant increasing trends of IMR (2012-2016:  
33  
34 +9.3% annually,  $p=0.07$ ) and ENMR (2011-2016: +10.2% annually,  $p=0.06$ ) were observed. By  
35  
36 contrast, among infants born to non-Greek mothers, the high IMR increases (+17.1%; 95% CI  
37  
38 8.1% to 26.9% annually,  $p=0.002$ ) were restricted to the period 2004-2011 with no  
39  
40 statistically significant change thereafter (2011-2016); no break was identified for ENMR  
41  
42 curve. Significant increases in IMR and ENMR trends after the year 2008 were observed in  
43  
44 the total study population, whereas no break was found for LNMR and PNMR measures in  
45  
46 Greeks, non-Greeks or the total study population (Table 3).

47  
48  
49 The results of ITS analyses in the preset years 2008, 2010 and 2012 are shown in Figures 2  
50  
51 and 3. Compared to the joinpoint regression showing non-significant increases in IMR from  
52  
53 2012 to 2016 for infants born to Greek mothers, ITS analysis showed a significant increase in  
54  
55 IMR ( $p=0.0001$ ) in this population during the same time period and further identified

1  
2  
3 significant increases in LNMR ( $p=0.0004$ ) and PNMR trends ( $p=0.03$ ). As regards the non-  
4  
5 significant increases of ENMR trends after the year 2011 by joinpoint regression in infants  
6  
7 born to Greek mothers ( $p=0.06$ ), ITS analysis showed a non-significant increase during the  
8  
9 post 2012 time period ( $p=0.07$ ); however, a significant increase during the post 2010 time  
10  
11 period in these infants was observed ( $p=0.01$ ) (Figure 2). In infants born to non-Greek  
12  
13 mothers, while a significant increase in IMR trends was found by joinpoint regression  
14  
15 analyses during the period 2004-2011, by ITS analyses -depending on when the year of  
16  
17 interest was being defined (2010 or 2012)- the increase was either not significant (2004-  
18  
19 2010,  $p=0.11$ ) or significant (2004-2012,  $p=0.001$ ); no change in IMR was identified by ITS  
20  
21 analysis over the 2010-2016 or 2012-2016 time periods in non-Greek mothers' infants  
22  
23 (Figure 3).  
24  
25  
26  
27  
28  
29  
30

## 31 Discussion

32  
33 Trends of neonatal and infant mortality in Greece, spanning from year 2004 -before the  
34  
35 initiation of crisis in 2008- to year 2016, are not homogeneous, given significant increases in  
36  
37 the relatively small proportion of infants born to non-Greek nationality mothers as  
38  
39 contrasted to declining IMR trends among Greek mothers' infants, differentials by place of  
40  
41 residence and also increases in IM indices among Greek mothers' infants noted ~four years  
42  
43 after the crisis initiation. Specifically, the "brake" of 2012 identified, by joint point regression  
44  
45 analysis, non-significant increases of ~10% annually, in IMR and ENMR trends, whereas by ITS  
46  
47 analyses, significant increases in IMR, LNMR and PNMR trends were observed thereafter  
48  
49 among infants born to Greek mothers, a fact indicating how sensitive the results are  
50  
51 depending on the statistical method used. Changes in HDI during the study period were also  
52  
53 reflected in the inverse associations of HDI with ENMR and IMR, but also PNMR, among  
54  
55 infants born to Greek mothers.  
56  
57  
58  
59  
60

1  
2  
3 Strengths of the present investigation, as contrasted to previously Greek-based published  
4  
5 studies,<sup>9,18,20,21,23</sup> include the longest follow-up period of national data, namely since 2004,  
6  
7 before the crisis, when the first data on maternal ethnicity became electronically available,  
8  
9 to the latest available year 2016. Of great importance is also the fact that, for the first time,  
10  
11 the maternal ethnicity was considered in the analyses explaining part, if not most, of the  
12  
13 heterogeneity of trends through the study period. To this end, three complimentary  
14  
15 statistical methodologies were used to describe the overall evolution depicted in Figure 1.  
16  
17 Thus, we were able to enhance the validity of the results pertaining to the study of the  
18  
19 evolution of individual IMR components, namely ENMR, LNMR and PNMR, in association  
20  
21 with socioeconomic factors (i.e maternal nationality, place of residence and HDI) for which  
22  
23 individual data have been available on a nationwide level among both deaths and livebirths  
24  
25 during the study period. Calculation of IMR and its components was based on the number of  
26  
27 livebirths; yet, the absence of a linkage system between birth and death data consists a  
28  
29 limitation of the study. The absence of a linkage system, as well as that of other official  
30  
31 registries in Greece, has not allowed use of known determinants of socioeconomic  
32  
33 deprivation or social coherence, such as parental education, employment/occupation,  
34  
35 marital status, family income and household size. Neither were data on the role of biological  
36  
37 factors, such as parental age, gestational age and birthweight, or multiplicity of pregnancy  
38  
39 available for both the livebirths and deaths series.<sup>5,19,24</sup> Besides, the study period, with  
40  
41 available information on maternal nationality and place of residence, was rather short leading  
42  
43 to ITS analyses with few data points; however, ITS analysis can be used even for few  
44  
45 observations; no log-transformation is needed but the results should be interpreted with  
46  
47 caution as the power depends on various factors.<sup>25</sup> Lastly, analyses by specific cause of infant  
48  
49 death were not set among the outcome measures of this study.  
50  
51  
52  
53  
54  
55  
56  
57  
58  
59  
60

1  
2  
3 Assessing migration as a determinant of perinatal health outcome and infant death in the  
4  
5 developed countries is a complex undertaking resulting in conflicting results of published  
6  
7 studies. Specifically, some studies, have shown that ethnic minority is a significant risk factor  
8  
9 for unfavorable perinatal outcomes and increased neonatal and infant mortality,<sup>18,26-33</sup>  
10  
11 especially if it coincides with a financial crisis, as was the case in Greece. Factors possibly  
12  
13 contributing to the increased risk for poorer outcomes among children born to migrants  
14  
15 include socioeconomic disadvantage, poor communication, discrimination, reduced  
16  
17 utilization of health facilities, low quality of care, but also stress and consanguinity or  
18  
19 differing attitudes to screening and termination of pregnancy associated with preterm birth,  
20  
21 low birth weight or congenital anomalies and lethal inherited diseases.<sup>26,30,34-36</sup> By contrast,  
22  
23 other studies present similar or even better perinatal health outcomes among some migrant  
24  
25 groups than among natives (“healthy migrant effect/paradox”).<sup>26-28,37,38</sup> Refugees have been  
26  
27 recognized as the most vulnerable group suffering increased severe neonatal morbidity and  
28  
29 infant mortality risk,<sup>26,28</sup> although no absolutely clear pattern regarding refugee or non-  
30  
31 refugee status among migrants has been identified.<sup>34</sup>  
32  
33  
34 In our study, starting rates of IMR and its components among infants born to non-Greek  
35  
36 mothers were lower compared to those of Greek mothers. Of note, the ratio of non-Greek  
37  
38 infants among live births during 2009-2016 vs. 2004-2008 was only 1.32, whereas the  
39  
40 respective figure among infant deaths was almost 3-fold (data not shown). Actually, in the  
41  
42 pre-crisis era, non-Greek mothers of newborns comprised mainly economic migrants, most  
43  
44 of them of Albanian nationality living for many years, or even born, in Greece. After 2008,  
45  
46 Greece experienced an influx of refugees with the majority of them fleeing from war and  
47  
48 terror in Syria, Occupied Palestinian Territory, but also from Afghanistan, Iraq and other  
49  
50 countries.<sup>16,17</sup> It could be suggested that changes in the homogeneity of foreign mothers  
51  
52 during the study period, in association with the country’s economic difficulties, might have  
53  
54  
55  
56  
57  
58  
59  
60



1  
2 led from the “healthy migrant effect”, observed before 2008, to the deterioration of IM  
3 indicators and IMR trends, afterwards, in infants born to non-Greek mothers. We did  
4  
5 observe significant increases in IMR trends in all ethnic groups of non-Greek mothers during  
6  
7 the study period, especially in infants born to mothers from Africa; however as the numbers  
8  
9 by individual maternal nationality were rather small, this issue needs to be further studied.  
10  
11  
12

13  
14 Simultaneously with immigration to/through Greece, the country experienced the third  
15  
16 wave of mass emigration in the 20<sup>th</sup> and 21<sup>st</sup> centuries; over 400,000 Greek citizens left  
17  
18 Greece since the onset of the economic crisis, in 2008, seeking new opportunities and  
19  
20 employment in other countries, mainly Germany, the United Kingdom and the  
21  
22 Netherlands.<sup>39,40</sup> The current emigration wave of Greeks involved mostly highly-educated  
23  
24 people (the so called “brain-drain”) of young age, leading to a decrease in the number of  
25  
26 Greek women of childbearing age.<sup>41</sup> This fact, along with the decrease in the fertility rate by  
27  
28 almost 10% between 2008 and 2016, contributes significantly to the reduction in the annual  
29  
30 number of livebirths in Greece by almost 23% during the period of the economic crisis.<sup>41,42</sup>  
31  
32 Furthermore, the flow of mostly affluent and well educated people going outside Greece  
33  
34 could also contribute to increases in IMR among Greek children following the crisis.  
35  
36  
37  
38  
39  
40

41  
42 Indeed, the strongly decreasing IMR trends among Greek infants were stagnated after a lag  
43  
44 time of ~four years of crisis and equalized with the previously sharply increasing trends  
45  
46 among non-Greek maternal nationality infants; this time lag is reasonable<sup>43</sup> and in line with  
47  
48 previous findings showing that following reductions in the government healthcare spending  
49  
50 in Europe, the greatest negative effect on neonatal and post neonatal mortality was 4 and 5  
51  
52 years later, respectively.<sup>6</sup> The irony is that the period 2012-2016, during which the crisis was  
53  
54 deepening<sup>13,14</sup> and stricter economic austerity measures were applied,<sup>44</sup> disparities gap in  
55  
56 IMR trends diminished against the Greek population; IMR trends deteriorated only in infants  
57  
58  
59  
60

1  
2 born to Greek mothers, whereas in infants born to non-Greek mothers IMR trends  
3  
4 approached an anelastic highest value up to 2011 with no statistically significant change  
5  
6 thereafter.  
7  
8

9  
10 Disparities in IMR still exist across geographic areas even in well developed countries; i.e.  
11  
12 IMR in the United States vary by urbanization level of maternal residency being lowest in  
13  
14 large urban counties but highest in rural areas.<sup>45</sup> Rural women may face health challenges  
15  
16 related to geographic barriers to care (less timely and/or appropriate care) and physician  
17  
18 shortages, but they may also present differences in a number of socioeconomic and  
19  
20 demographic risk factors, such as less education, lower income, younger age at pregnancy,  
21  
22 or greater number of children, in comparison with their urban counterparts.<sup>46,47</sup> The  
23  
24 increasing IMR trends during the study period in infants born to Greek mothers living in rural  
25  
26 areas, as opposed to the declining IMR trends in those born to Greek mothers living in  
27  
28 urban/semi urban areas, is worrisome; specific causes should be further studied and  
29  
30 addressed. As regards infants born to non-Greek mothers, the increasing IMR trends despite  
31  
32 living in urban areas can be explained by previous reports showing that other risk factors, i.e.  
33  
34 young maternal age (<20 years) or maternal ethnic minority, may be more powerful than  
35  
36 place of residence.<sup>47</sup>  
37  
38

39  
40 Among the three IMR components, ENMR seemed to be the most “sensitive” in reflecting  
41  
42 adverse impacts on child health. Specifically, ENMR was overall positively associated with  
43  
44 rural place of residence of Greek mothers' children and also presented the most sizeable  
45  
46 increase among IM indices in non-Greeks (Table 2). Moreover, among the three IM  
47  
48 components, ENMR was the first or the only one, -depending on the statistical method used-  
49  
50 , that increased after the crisis initiation in infants born to Greek mothers. ENMR, in  
51  
52 developed countries, including Greece, represents more than 70% of neonatal deaths on  
53  
54 account mainly of prematurity/low birth weight and congenital anomalies.<sup>14,48-51</sup> Actually, it  
55  
56  
57  
58  
59  
60

1  
2  
3 reflects perinatal health and care during pregnancy and labor, and also postnatal care in the  
4  
5 first week of life.<sup>50</sup> Increased incidence of impaired perinatal parameters including low birth  
6  
7 weight, prematurity, and increased maternal age and rate of caesarian section, have been  
8  
9 reported during the years of the economic decline in Greece.<sup>18,19</sup> Cuts in public health  
10  
11 expenditures between 2008 and 2016, reduction in health care workforce and pediatric  
12  
13 nurses, as well as reduction in the number of obstetrics beds, obstetricians and midwives (-  
14  
15 45.5%, -60.2% and -27.5%, respectively)<sup>14</sup> could possibly explain, at least in part, the  
16  
17 observed positive ENMR trends during the post-crisis period in Greece.  
18  
19  
20  
21

22 The exact mechanisms leading to the disparities in trends of neonatal and infant mortality  
23  
24 observed in this study remain to be further explored. Specific maternal, family and infant  
25  
26 features, including detailed and punctual information on the causes of infant deaths, would  
27  
28 have shed more light on the links between IMR trends and socioeconomic factors but were  
29  
30 beyond the scope of this article and left for future research. Meanwhile, policies and  
31  
32 programs should be implemented to mitigate the negative impact of the crisis on population  
33  
34 and infant health in Greece. Vulnerable groups, such as mothers of non-Greek nationality, of  
35  
36 low income, or rural place of residence, should be specifically addressed and their rights to  
37  
38 health protected. Barriers in the access of refugees to the Greek health care system have  
39  
40 been identified; they are mostly related to language, culture, and inadequate information  
41  
42 about the healthcare system, but also include difficulties in the coordination of Health  
43  
44 Services, transportation problems, issues in obtaining expertise medical assessment in the  
45  
46 camps, lack of continuity of care, financial difficulties in making out-of-pocket payments for  
47  
48 health and social care services, and administrative barriers, among others.<sup>52</sup> In response, the  
49  
50 Greek government and several Non-Governmental Organizations initiated commendable  
51  
52 actions, i.e. National Health System services free of charge for uninsured and vulnerable  
53  
54 social groups including asylum seekers, translation services in public hospitals, access to  
55  
56  
57  
58  
59  
60

1  
2 specialist care/treatment with Gynecologists (mostly women), midwives, dentists,  
3  
4 psychologists, and psychiatrists being lately included in the camp clinics;<sup>52</sup> these actions may  
5  
6 have prevented deterioration of IMR which are being kept at steady levels after 2011-2012  
7  
8 in infants of non-Greek mothers; efforts should be continued and intensified, however, as to  
9  
10 ensure equity with local populations. Strong governmental integration policy for minorities  
11  
12 paired with initiatives to improve social coherence, a deeply rooted mechanism for  
13  
14 protection of health among those in need in the Greek society, along with further  
15  
16 improvements in primary health care delivery could help to alleviate the cost in infant lives  
17  
18 and ensure healthy adulthood.<sup>32,51</sup> Irrespective of the crisis, improvements in the quality of  
19  
20 perinatal and neonatal care, including centralization of very preterm deliveries,  
21  
22 establishment of regional perinatal centers, monitoring of the implementation of evidence-  
23  
24 based practices in maternity and neonatal units, as well as increase in health expenditures,  
25  
26 health care workforce, number of doctors and midwives/nurses, could decrease ENMR,  
27  
28 eventually leading to overall decrease in IMR in Greece.<sup>50</sup>  
29  
30  
31  
32  
33  
34  
35  
36  
37  
38

## 39 REFERENCES

- 41 1. Petridou E, Valadian I, Trichopoulos D, Tzonou A, Kyriopoulos Y, Matsaniotis N. Medical  
42 services and socioeconomic factors: Determinants of infant mortality in Greece.  
43  
44 *Hygie*1989;3:20-3.  
45  
46
- 47 2. WHO. The determinants of health. <http://www.who.int/hia/evidence/doh/en> (Date of  
48 access: 30/5/2018)  
49  
50  
51
- 52 3. Zylbersztejn A, Gilbert R, Hjern A, Wijlaars L, Hardelid P. Child mortality in England  
53 compared with Sweden: a birth cohort study. *Lancet* 2018;391(10134):2008-2018.  
54  
55  
56  
57  
58  
59  
60  
doi:10.1016/S0140-6736(18)30670-6.

- 1  
2  
3 4. Rajmil L, Fernandez de Sanmamed MJ, Choonara I, et al; International Network for  
4  
5 Research in Inequalities in Child Health (INRICH). Impact of the 2008 economic and financial  
6  
7 crisis on child health: a systematic review. *Int J Environ Res Public Health* 2014;11:6528-  
8  
9 46.doi:10.3390/ijerph110606528.
- 10  
11  
12 5. Glonti K, Gordeev VS, Goryakin Y, Reeves A, Stuckler D, McKee M, Roberts B. A systematic  
13  
14 review on health resilience to economic crises. *PLoS One* 2015;10:e0123117.  
15  
16 doi:10.1371/journal.pone.0123117.
- 17  
18  
19 6. Budhdeo S, Watkins J, Atun R, Williams C, Zeltner T, Maruthappu M. Changes in  
20  
21 government spending on healthcare and population mortality in the European union, 1995–  
22  
23 2010: a cross-sectional ecological study. *J R Soc Med* 2015;108:490-8.  
24  
25 doi:10.1177/0141076815600907.
- 26  
27  
28 7. Tapia Granados JA, Rodriguez JM. Health, economic crisis, and austerity: A comparison of  
29  
30 Greece, Finland and Iceland. *Health Policy* 2015;119:941-53.  
31  
32 doi:10.1016/j.healthpol.2015.04.009.
- 33  
34  
35 8. Regidor E, Barrio G, Bravo MJ, de la Fuente L. Has health in Spain been declining since the  
36  
37 economic crisis? *J Epidemiol Community Health* 2014;68:280-2.doi:10.1136/jech-2013-  
38  
39 202944.
- 40  
41  
42 9. Laliotis I, Ioannidis JPA, Stavropoulou C. Total and cause-specific mortality before and  
43  
44 after the onset of the Greek economic crisis: an interrupted time-series analysis. *Lancet*  
45  
46 *Public Health* 2016;1: e56–e65. doi:10.1016/S2468-2667(16)30018-4.
- 47  
48  
49 10. Parmar D, Stavropoulou C, Ioannidis JP. Health outcomes during the 2008 financial crisis  
50  
51 in Europe: systematic literature review. *BMJ* 2016;354:i4588. doi:10.1136/bmj.i4588.
- 52  
53  
54 11. O'Donnell C, Burns N, Dowrick C, Lionis C, MacFarlane A; RESTORE team. Health-care  
55  
56 access for migrants in Europe. *Lancet* 2013; 382:393. doi: 10.1016/S0140-6736(13)61666-9.  
57  
58  
59  
60

- 1  
2  
3 12. Karanikolos M, Heino P, McKee M, Stuckler D, Legido-Quigley H. Effects of the Global  
4  
5 Financial Crisis on Health in High-Income OECD Countries: A Narrative Review. *Int J Health*  
6  
7 *Serv* 2016;46:208-40. doi: 10.1177/0020731416637160.  
8  
9  
10 13. Organisation for Economic Co-operation and Development OECD data.  
11  
12 <https://data.oecd.org> (Date of access: 30/5/2018) (2016).  
13  
14  
15 14. Hellenic Statistical Authority *Statistics*. [www.statistics.gr](http://www.statistics.gr) (Date of access: 30/5/2018)  
16  
17 (2016).  
18  
19 15. Zavras D, Zavras AI, Kyriopoulos II, Kyriopoulos J. Economic crisis, austerity and unmet  
20  
21 healthcare needs: the case of Greece. *BMC Health Serv Res* 2016;16:309.  
22  
23 doi:10.1186/s12913-016-1557-5.  
24  
25  
26 16. European Union. The EU and the migration crisis, July 2017,  
27  
28 <http://publications.europa.eu>  
29  
30  
31 17. Mertens E, Rockenschaub G, Economopoulou A, Kreidl P. Assessment of public health  
32  
33 issues of migrants at the Greek-Turkish border, April 2011. *Euro Surveill* 2012 Jan 12;17(2).  
34  
35 pii: 20056.  
36  
37  
38 18. Zografaki I, Papamichail D, Panagiotopoulos T. Adverse effect of the financial crisis in  
39  
40 Greece on perinatal factors. *Eur J Public Health* 2018 [Epub ahead of print]. doi:  
41  
42 10.1093/eurpub/cky078.  
43  
44  
45 19. Sdoná E, Papamichail D, Ragkou E, Briana DD, Malamitsi-Puchner A, Panagiotopoulos T.  
46  
47 Greek economic crisis and impaired perinatal parameters: experience from a public  
48  
49 maternity hospital. *J Matern Fetal Neonatal Med* 2018;31:2371-5.  
50  
51 doi:10.1080/14767058.2017.1342803.  
52  
53  
54 20. Michas G, Varytimiadi A, Chasiotis I, Micha R. Maternal and child mortality in Greece.  
55  
56 *Lancet* 2014;383:691-2. doi:10.1016/S0140-6736(14)60251-8.  
57  
58  
59  
60

- 1  
2  
3 21. Filippidis F, Gerovasili V, Millett C, Tountas Y. Medium-term impact of the economic crisis  
4 on mortality, health-related behaviours and access to healthcare in Greece. *Sci Rep*  
5 2017;7:46423. doi:10.1038/srep46423.  
6  
7  
8  
9  
10 22. Kim HJ, Fay MP, Feuer EJ, Midthune DN. Permutation tests for joinpoint regression with  
11 applications to cancer rates. *Stat Med* 2000;19:335-51. PMID:10649300  
12  
13  
14 23. Simou E, Koutsogeorgou E. Effects of the economic crisis on health and healthcare in  
15 Greece in the literature from 2009 to 2013: a systematic review. *Health Policy* 2014;115:111-  
16 9. doi: 10.1016/j.healthpol.2014.02.002.  
17  
18  
19  
20 24. Petridou ET, Georgakis MK, Erdmann F, et al. Advanced parental age as risk factor for  
21 childhood acute lymphoblastic leukemia: results from studies of the Childhood Leukemia  
22 International Consortium. *Eur J Epidemiol* 2018. doi:10.1007/s10654-018-0402-z. [Epub  
23 ahead of print].  
24  
25  
26  
27 25. Bernal JL, Cummins S, Gasparrini A. Interrupted time series regression for the evaluation  
28 of public health interventions: a tutorial. *Int J Epidemiol* 2017;46(1):348-55. doi:  
29 10.1093/ije/dyw098.  
30  
31  
32 26. Gissler M, Alexander S, MacFarlane A, et al. Stillbirths and infant deaths among migrants  
33 in industrialized countries. *Acta Obstet Gynecol Scand* 2009;88:134-  
34 48. doi:10.1080/00016340802603805.  
35  
36  
37  
38 27. Gagnon AJ, Zimbeck M, Zeitlin J, et al. Migration to western industrialized countries and  
39 perinatal health: a systematic review. *Soc Sci Med* 2009;69:934-46.  
40  
41  
42  
43  
44  
45  
46  
47  
48  
49  
50  
51  
52  
53  
54 28. Wanigaratne S, Cole DC, Bassil K, et al. Severe Neonatal Morbidity Among Births to  
55 Refugee Women. *Matern Child Health J* 2016;20:2189-98. doi:10.1007/s10995-016-2047-4.  
56  
57  
58  
59  
60

- 1  
2  
3 29. Puthussery S. Perinatal outcomes among migrant mothers in the United Kingdom: Is it a  
4 matter of biology, behaviour, policy, social determinants or access to health care? *Best Pract*  
5 *Res Clin Obstet Gynaecol* 2016;32:39-49. doi:10.1016/j.bpobgyn.2015.09.003.  
6  
7  
8  
9  
10 30. Wanner P, Bollini P. The contribution of the foreign population to the high level of infant  
11 mortality in Switzerland: a demographic analysis. *BMC Pregnancy Childbirth* 2017;17:151.  
12 doi:10.1186/s12884-017-1332-6.  
13  
14  
15  
16  
17 31. Cantarutti A, Franchi M, Monzio Compagnoni M, Merlino L, Corrao G. Mother's  
18 education and the risk of several neonatal outcomes: an evidence from an Italian  
19 population-based study. *BMC Pregnancy Childbirth* 2017;17:221. doi:10.1186/s12884-017-  
20 1418-1.  
21  
22  
23  
24  
25  
26  
27 32. Bollini P, Pampallona S, Wanner P, Kupelnick B. Pregnancy outcome of migrant women  
28 and integration policy: a systematic review of the international literature. *Soc Sci Med*  
29 2009;68:452-61. doi:10.1016/j.socscimed.2008.10.018.  
30  
31  
32  
33  
34 33. Gotsens M, Malmusi D, Villarroel N, et al. Health inequality between immigrants and  
35 natives in Spain: the loss of the healthy immigrant effect in times of economic crisis. *Eur J*  
36 *Public Health* 2015;25:923-9. doi:10.1093/eurpub/ckv126.  
37  
38  
39  
40  
41 34. Nybo Andersen AM, Gundlund A, Villadsen SF. Stillbirth and congenital anomalies in  
42 migrants in Europe. *Best Pract Res Clin Obstet Gynaecol* 2016;32:50-9.  
43 doi:10.1016/j.bpobgyn.2015.09.004.  
44  
45  
46  
47  
48 35. Di Renzo GC, Tosto V, Giardina I. The biological basis and prevention of preterm birth.  
49 *Best Pract Res Clin Obstet Gynaecol* 2018. doi:10.1016/j.bpobgyn.2018.01.022. [Epub ahead  
50 of print].  
51  
52  
53  
54  
55 36. Wanigaratne S, Cole DC, Bassil K, Hyman I, Moineddin R, Urquia ML. The influence of  
56 refugee status and secondary migration on preterm birth. *J Epidemiol Community Health*  
57 2016;70:622-8. doi:10.1136/jech-2015-206529.  
58  
59  
60



- 1  
2  
3 37. Kirby RS. Perinatal outcomes and nativity: does place of birth really influence infant  
4 health? *Birth* 2011;38:354-6. doi:10.1111/j.1523-536X.2011.00505.x.  
5  
6  
7 38. Sdoná E, Papamichail D, Ragkou E, et al. Migration status and perinatal parameters in a  
8 Greek public maternity hospital: an illustration of the "healthy immigrant effect". *J Matern*  
9 *Fetal Neonatal Med* 2017. doi: 10.1080/14767058.2017.1371131. [Epub ahead of print].  
10  
11  
12  
13  
14 39. Eurostat, "Emigration by age group, sex and citizenship".  
15 [http://appsso.eurostat.ec.europa.eu/nui/show.do?dataset=migr\\_emi1ctz&lang=en](http://appsso.eurostat.ec.europa.eu/nui/show.do?dataset=migr_emi1ctz&lang=en)(last  
16 updated: 04/04/2018).  
17  
18  
19  
20  
21 40. Cavounidis J. The changing face of emigration: Harnessing the potential of the New  
22 Greek Diaspora. Washington, DC: Migration Policy Institute, 2015.  
23  
24  
25  
26 41. Vrachnis N, Vlachadis N, Iliodromiti Z, Vlachadi M, Creatsas G. Greece's birth rates and  
27 the economic crisis. *Lancet* 2014;383:692-3. doi: 10.1016/S0140-6736(14)60252-X.  
28  
29  
30  
31 42. Eurostat, "Fertility indicators". [http://appsso.eurostat.ec.europa.eu/nui/show.](http://appsso.eurostat.ec.europa.eu/nui/show.do?dataset=demo_find&lang=en)  
32 [do?dataset=demo\\_find&lang=en](http://appsso.eurostat.ec.europa.eu/nui/show.do?dataset=demo_find&lang=en) (last updated: 20/09/2018)  
33  
34  
35  
36 43. Karanikolos M, Mladovsky P, Cylus J, et al. Financial crisis, austerity, and health in  
37 Europe. *Lancet* 2013;381:1323-31. doi:10.1016/S0140-6736(13)60102-6.  
38  
39  
40  
41 44. Burki T. Health under austerity in Greece. *Lancet* 2018;391:525-6. doi:10.1016/S0140-  
42 6736(18)30242-3.  
43  
44  
45  
46 45. Ely DM, Driscoll AK, Mathews TJ. Infant mortality rates in rural and urban areas in the  
47 United States, 2014. *NCHS data brief*, No 285. Hyattsville, MD: National Center for Health  
48 Statistics, 2017.  
49  
50  
51  
52  
53 46. Van de Poel E, O'Donnell O, Van Doorslaer E. What explains the rural-urban gap in infant  
54 mortality: household or community characteristics? *Demography* 2009;46:827-  
55 50. doi:org/10.1353/dem.0.0074.  
56  
57  
58  
59  
60

- 1  
2  
3 47. Harris DE, Aboueissa AM, Baugh N, Sarton C. Impact of rurality on maternal and infant  
4  
5 health indicators and outcomes in Maine. *Rural Remote Health* 2015;15:3278.  
6  
7 48. Heron M. Deaths: Leading Causes for 2015. *Natl Vital Stat Rep* 2017;66:1-76.  
8  
9  
10 49. Roncancio CP, Misnaza SP, Peña IC, Prieto FE, Cannon MJ, Valencia D. Trends and  
11  
12 characteristics of fetal and neonatal mortality due to congenital anomalies, Colombia 1999-  
13  
14 2008. *J Matern Fetal Neonatal Med* 2018;31:1748-55. doi:10.1080/14767058.2017.1326901.  
15  
16  
17 50. Lehtonen L, Gimeno A, Parra-Llorca A, Vento M. Early neonatal death: A challenge  
18  
19 worldwide. *Semin Fetal Neonatal Med* 2017;22:153-60. doi:10.1016/j.siny.2017.02.006.  
20  
21  
22 51. Alexander M, Harding M, Lamarche C. Quantifying the impact of economic crises on  
23  
24 infant mortality in advanced economies. *Applied Economics* 2011; 43: 3313–23.  
25  
26 doi:10.1080/00036840903559620.  
27  
28  
29 52. Kotsiou OS, Kotsios P, Srivastava DS, Kotsios V, Gourgoulisanis KI, Exadaktylos AK. Impact  
30  
31 of the Refugee Crisis on the Greek Health care System: A Long Road to Ithaca. *Int J Environ*  
32  
33 *Res Public Health* 2018;15(8). pii:E1790. doi: 10.3390/ijerph15081790.  
34  
35  
36  
37  
38  
39  
40

41 **Contributors:** EP and GC were involved in the initial conception of the study. All authors  
42  
43 contributed to the design, analysis and interpretation of data. TS, ND and EP developed the  
44  
45 first draft of the manuscript and all authors critically revised it and approved the final  
46  
47 version. ND, AA and CM performed the statistical analyses; EE reviewed statistics and  
48  
49 contributed significantly for ITS analyses. All authors agree to be accountable for all aspects  
50  
51 of the work in ensuring that questions related to the accuracy or integrity of any part of the  
52  
53 work are appropriately investigated and resolved. The corresponding author ensures that all  
54  
55 the journal's administrative requirements are properly completed.  
56  
57  
58  
59  
60

1  
2  
3 **Acknowledgements:** ELSTAT has provided individual anonymized data.  
4  
5

6  
7 **Data sharing:** Data are available upon request from ELSTAT  
8

9  
10 (<http://www.statistics.gr/el/statistical-data-request>)  
11  
12

### 13 14 15 **Funding Statement**

16  
17 This research received no specific grant from any funding agency in the public, commercial  
18 or not-for-profit sectors'.  
19  
20

### 21 22 23 24 **Competing interests statement**

25  
26 All authors have completed the ICMJE uniform disclosure form at  
27 [www.icmje.org/coi\\_disclosure.pdf](http://www.icmje.org/coi_disclosure.pdf) and declare: no support from any organization for the  
28 submitted work; no financial relationships with any organizations that might have an interest  
29 in the submitted work in the previous three years; no other relationships or activities that  
30 could appear to have influenced the submitted work.  
31  
32  
33  
34  
35  
36  
37  
38  
39  
40  
41  
42

### 43 **Figure Legends**

44  
45  
46 **Figure 1.** Evolution of Infant Early, Late and Post Neonatal Mortality Rates in Greece (2004-  
47 2016) overall and by maternal nationality.  
48  
49

50  
51  
52 **Figure 2.** Interrupted Time Series analyses for evolution of infant (IMR), early (ENMR), late  
53 (LNMR) and post neonatal mortality rates (PNMR) in alternative prespecified years of  
54 interest (2008, 2010 and 2012) in infants born to Greek mothers.  
55  
56  
57  
58  
59  
60

1  
2  
3 **Figure 3.** Interrupted Time Series analyses for evolution of infant (IMR), early (ENMR), late  
4 (LNMR) and post neonatal mortality rates (PNMR) in alternative prespecified years of  
5 interest (2008, 2010 and 2012) in infants born to non-Greek mothers.  
6  
7  
8  
9  
10  
11  
12  
13  
14  
15  
16  
17  
18  
19  
20  
21  
22  
23  
24  
25  
26  
27  
28  
29  
30  
31  
32  
33  
34  
35  
36  
37  
38  
39  
40  
41  
42  
43  
44  
45  
46  
47  
48  
49  
50  
51  
52  
53  
54  
55  
56  
57  
58  
59  
60

For peer review only

**Table 1.** Livebirths, infant deaths, total infant mortality rates (IMR) per 1000 livebirths in infants born to Greek and non-Greek mothers, and Human Development Index (HDI), in Greece during the period 2004-2016.

| Year | Infants born to Greek mothers |                   |                                 | Infants born to non-Greek mothers |                   |                                 | HDI   |
|------|-------------------------------|-------------------|---------------------------------|-----------------------------------|-------------------|---------------------------------|-------|
|      | Livebirths (N)                | Infant deaths (N) | Mortality Rates/1000 livebirths | Livebirths (N)                    | Infant deaths (N) | Mortality Rates/1000 livebirths |       |
| 2004 | 88805                         | 403               | 4.5                             | 16825                             | 26                | 1.5                             | 0.835 |
| 2005 | 89819                         | 383               | 4.3                             | 17678                             | 26                | 1.5                             | 0.845 |
| 2006 | 92590                         | 379               | 4.1                             | 19396                             | 36                | 1.9                             | 0.851 |
| 2007 | 91462                         | 359               | 3.9                             | 20412                             | 38                | 1.9                             | 0.849 |
| 2008 | 96329                         | 281               | 2.9                             | 21931                             | 32                | 1.5                             | 0.857 |
| 2009 | 95640                         | 307               | 3.2                             | 22244                             | 58                | 2.6                             | 0.858 |
| 2010 | 93209                         | 355               | 3.8                             | 21351                             | 80                | 3.7                             | 0.856 |
| 2011 | 87445                         | 282               | 3.2                             | 18680                             | 74                | 4.0                             | 0.852 |
| 2012 | 84868                         | 241               | 2.8                             | 15153                             | 52                | 3.4                             | 0.854 |
| 2013 | 80938                         | 292               | 3.6                             | 13063                             | 53                | 4.1                             | 0.856 |
| 2014 | 79985                         | 298               | 3.7                             | 12144                             | 47                | 3.9                             | 0.864 |
| 2015 | 79919                         | 320               | 4.0                             | 11919                             | 44                | 3.7                             | 0.866 |
| 2016 | 80166                         | 338               | 4.2                             | 12721                             | 49                | 3.9                             | 0.868 |

\*excluding missing maternal nationality values.

**Table 2.** Poisson regression derived changes and 95% Confidence Intervals (CI) of infant (IMR), early (ENMR), late (LNMR) and post neonatal mortality rates (PNMR): Annual Percent of Change (APC) for place of residence and maternal nationality (2004-2016); Percept of Change (PC) for 1 Standard Deviation of Human Development Index (HDI) controlling for year of birth.

|                      | IMR  |                           |                  | ENMR |                            |                  | LNMR |                          |                   | PNMR |                            |              |
|----------------------|------|---------------------------|------------------|------|----------------------------|------------------|------|--------------------------|-------------------|------|----------------------------|--------------|
|                      | N    | APC (95% CI)              | p-value          | N    | APC (95% CI)               | p-value          | N    | APC (95% CI)             | p-value           | N    | APC (95% CI)               | p-value      |
| Maternal nationality |      |                           |                  |      |                            |                  |      |                          |                   |      |                            |              |
| Greek                | 4238 | <b>-0.9 (-1.7,-0.1)</b>   | <b>0.02</b>      | 1849 | -0.6 (-1.8,0.7)            | 0.35             | 995  | -0.6 (-2.3,1.1)          | 0.46              | 1393 | <b>-1.6 (-3.0,-0.2)</b>    | <b>0.02</b>  |
| Non-Greek            | 615  | <b>9.4 (6.9,11.9)</b>     | <b>&lt;.0001</b> | 258  | <b>12.5 (8.6,16.5)</b>     | <b>&lt;.0001</b> | 138  | <b>8.0 (3.1,13.2)</b>    | <b>0.001</b>      | 218  | <b>4.4 (0.6,8.4)</b>       | <b>0.02</b>  |
| All*                 | 4862 | 0.3 (-0.5, 1.0)           | 0.50             | 2107 | 0.9 (-0.3,2.1)             | 0.13             | 1136 | 0.4 (-1.2,2.0)           | 0.65              | 1617 | -0.9 (-2.2,0.5)            | 0.20         |
| Urbanization         |      |                           |                  |      |                            |                  |      |                          |                   |      |                            |              |
| Urban-Semi urban     |      |                           |                  |      |                            |                  |      |                          |                   |      |                            |              |
| Greek                | 3850 | <b>-2.1 (-2.9, -1.3)</b>  | <b>&lt;.0001</b> | 1738 | <b>-2.0 (-3.3, -0.8)</b>   | <b>0.002</b>     | 906  | <b>-1.8 (-3.5, -0.0)</b> | <b>0.05</b>       | 1206 | <b>-2.4 (-3.9, -0.9)</b>   | <b>0.002</b> |
| Non-Greek            | 563  | <b>8.8 (6.3, 11.4)</b>    | <b>&lt;.0001</b> | 243  | <b>13.2 (9.2, 17.4)</b>    | <b>&lt;.0001</b> | 123  | <b>6.7 (1.5, 12.2)</b>   | <b>0.01</b>       | 197  | <b>4.9 (0.9, 9.2)</b>      | <b>0.02</b>  |
| Any*                 | 4421 | <b>-0.8 (-1.6, -0.0)</b>  | <b>0.05</b>      | 1981 | -0.3 (-1.5, 0.9)           | 0.61             | 1037 | -0.8 (-2.4, 0.9)         | 0.36              | 1408 | <b>-1.5 (-2.9, 0.0)</b>    | <b>0.04</b>  |
| Rural                |      |                           |                  |      |                            |                  |      |                          |                   |      |                            |              |
| Greek                | 388  | <b>10.6 (7.6, 13.6)</b>   | <b>0.002</b>     | 108  | <b>24.1 (17.0, 31.5)</b>   | <b>&lt;.0001</b> | 93   | <b>12.7 (6.5, 19.2)</b>  | <b>&lt;0.0001</b> | 187  | 3.3 (-0.6, 7.4)            | 0.09         |
| Non-Greek            | 38   | <b>14.0 (4.0, 24.9)</b>   | <b>0.005</b>     | 10   | 15.5 (-2.4, 36.8)          | 0.09             | 11   | <b>18.1 (0.3, 39.0)</b>  | <b>0.05</b>       | 17   | 4.9 (-7.6, 19.1)           | 0.46         |
| Any*                 | 427  | <b>10.9 (8.1, 13.9)</b>   | <b>&lt;.0001</b> | 118  | <b>24.3 (17.6, 31.4)</b>   | <b>&lt;.0001</b> | 104  | <b>14.7(8.6, 21.1)</b>   | <b>&lt;0.0001</b> | 205  | 3.0 (-0.7, 6.9)            | 0.11         |
| HDI                  |      |                           |                  |      |                            |                  |      |                          |                   |      |                            |              |
|                      | PC   |                           |                  | PC   |                            |                  | PC   |                          |                   | PC   |                            |              |
| Greek                |      | <b>-8.6 (-14.8, -1.9)</b> | <b>0.01</b>      |      | <b>-11.3 (-20.8, -1.4)</b> | <b>0.03</b>      |      | 3.5 (-10.9, 20.1)        | 0.66              |      | <b>-12.3 (-22.2, -1.2)</b> | <b>0.03</b>  |
| Non-Greek            |      | -5.7 (-25.0, 18.7)        | 0.62             |      | -19.8 (-44.8, 16.6)        | 0.25             |      | 20.0 (-28.6, 101.7)      | 0.49              |      | -1.3 (-30.7, 40.5)         | 0.94         |
| All*                 |      | <b>-9.5 (15.3, -3.2)</b>  | <b>0.004</b>     |      | <b>-14.0 (-22.3, -4.7)</b> | <b>0.004</b>     |      | 3.3 (-10.4, 19.3)        | 0.65              |      | <b>-11.4 (-20.8, -0.7)</b> | <b>0.04</b>  |

\*including missing maternal nationality values

**Table 3.** Joinpoint regression derived Annual Percent of Change (APC) and 95% Confidence Intervals (CI) of infant (IMR), early neonatal (ENMR), late neonatal (LNMR) and post neonatal (PNMR) mortality rates by maternal nationality.

|           | IMR     |      |                   |         | ENMR        |      |                     |         |
|-----------|---------|------|-------------------|---------|-------------|------|---------------------|---------|
|           | Years   | N    | APC (95% CI)      | p-value | Time period | N    | APC (95% CI)        | p-value |
| Greek     | 2004-12 | 2870 | -4.5 (-7.6, -1.3) | 0.01    | 2004-11     | 1118 | -6.5 (-11.4, -1.4)  | 0.02    |
|           | 2012-16 | 1368 | 9.3 (-1.1, 20.9)  | 0.07    | 2011-16     | 731  | 10.2 (-0.4, 21.9)   | 0.06    |
| Non-Greek | 2004-11 | 333  | 17.1 (8.1, 26.9)  | 0.002   | 2004-16     | 258  | 13.8 (6.7, 21.3)    | 0.001   |
|           | 2011-16 | 282  | 0.2 (-11.5, 13.5) | 0.97    |             |      |                     |         |
| All*      | 2004-08 | 1807 | -7.5 (-14.6, 0.3) | 0.06    | 2004-08     | 780  | -10.7 (-19.9, -0.5) | 0.04    |
|           | 2008-16 | 3055 | 3.6 (0.7, 6.6)    | 0.02    | 2008-16     | 1327 | 6.1 (2.1, 10.3)     | 0.01    |
|           | LNMR    |      |                   |         | PNMR        |      |                     |         |
|           | Years   | N    | APC (95% CI)      | p-value | Time period | N    | APC (95% CI)        | p-value |
| Greek     | 2004-16 | 995  | -0.6 (-2.5, 1.4)  | 0.54    | 2004-16     | 1393 | -1.7 (-4.0, 0.8)    | 0.16    |
| Non-Greek | 2004-16 | 138  | 9.1 (3.5, 14.9)   | 0.003   | 2004-16     | 218  | 4.7 (-0.8, 10.6)    | 0.09    |
| All*      | 2004-16 | 1136 | 0.6 (-1.3, 2.5)   | 0.48    | 2004-16     | 1617 | -0.8 (-3.0, 1.4)    | 0.42    |

\* Including missing maternal nationality values.

No break in the time period examined was identified for ENMR in non-Greeks, as well as for LNMR and PNMR measures in Greeks, non-Greeks or the total study population.

1  
2  
3  
4  
5  
6  
7  
8  
9  
10  
11  
12  
13  
14  
15  
16  
17  
18  
19  
20  
21  
22  
23  
24  
25  
26  
27  
28  
29  
30  
31  
32  
33  
34  
35  
36  
37  
38  
39  
40  
41  
42  
43  
44  
45  
46  
47  
48  
49  
50  
51  
52  
53  
54  
55  
56  
57  
58  
59  
60



Evolution of Infant Early, Late and Post Neonatal Mortality Rates in Greece (2004-2016) overall and by maternal nationality

60x81mm (300 x 300 DPI)



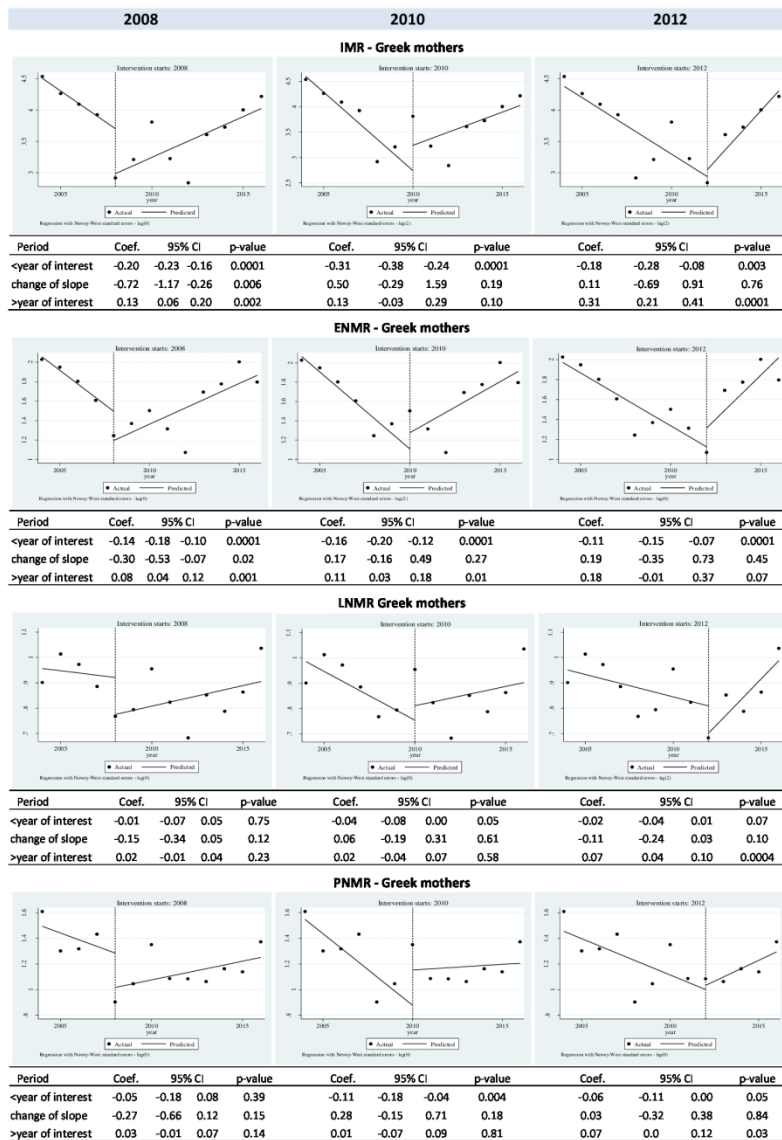

Interrupted Time Series analyses for evolution of infant (IMR), early (ENMR), late (LNMR) and post neonatal mortality rates (PNMR) in alternative prespecified years of interest (2008, 2010 and 2012) in infants born to Greek mothers.

140x198mm (300 x 300 DPI)

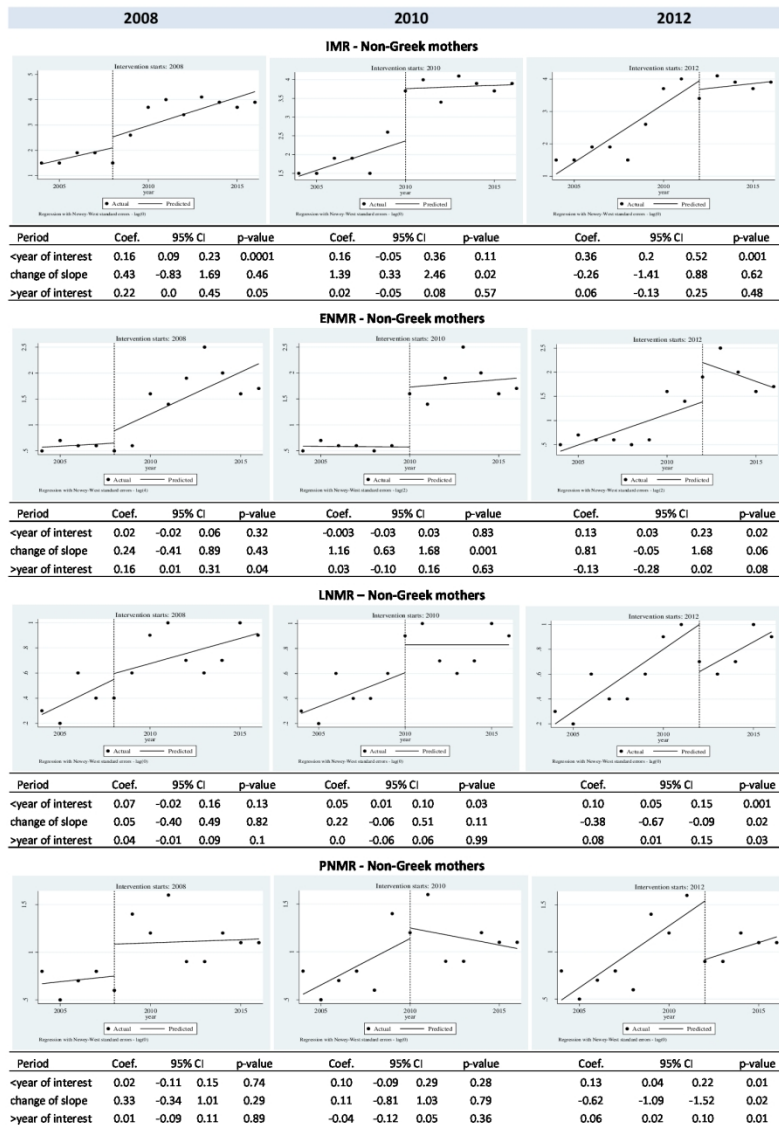

Interrupted Time Series analyses for evolution of infant (IMR), early (ENMR), late (LNMR) and post neonatal mortality rates (PNMR) in alternative prespecified years of interest (2008, 2010 and 2012) in infants born to non-Greek mothers.

140x198mm (300 x 300 DPI)

**Suppl. Table 1.** Infant deaths and total infant mortality rates (IMR) by place of residence (2004-2016).

| Year | Infants born to mothers living in urban/semiurban areas |                                 | Infants born to mothers living in rural areas |                                 |
|------|---------------------------------------------------------|---------------------------------|-----------------------------------------------|---------------------------------|
|      | Infant deaths (N)                                       | Mortality rates/1000 livebirths | Infant deaths (N)                             | Mortality rates/1000 livebirths |
| 2004 | 400                                                     | 4.5                             | 29                                            | 1.8                             |
| 2005 | 383                                                     | 4.2                             | 26                                            | 1.6                             |
| 2006 | 382                                                     | 4.0                             | 33                                            | 1.9                             |
| 2007 | 377                                                     | 3.9                             | 20                                            | 1.2                             |
| 2008 | 298                                                     | 2.9                             | 16                                            | 0.9                             |
| 2009 | 344                                                     | 3.4                             | 27                                            | 1.5                             |
| 2010 | 403                                                     | 4.1                             | 33                                            | 1.9                             |
| 2011 | 326                                                     | 3.5                             | 31                                            | 2.2                             |
| 2012 | 276                                                     | 3.2                             | 17                                            | 1.3                             |
| 2013 | 334                                                     | 4.2                             | 11                                            | 0.8                             |
| 2014 | 284                                                     | 3.6                             | 55                                            | 3.9                             |
| 2015 | 299                                                     | 3.8                             | 61                                            | 4.5                             |
| 2016 | 315                                                     | 4.0                             | 68                                            | 4.9                             |

1  
2  
3  
4  
5  
6  
7  
8  
9  
10  
11  
12  
13  
14  
15  
16  
17  
18  
19  
20  
21  
22  
23  
24  
25  
26  
27  
28  
29  
30  
31  
32  
33  
34  
35  
36  
37  
38  
39  
40  
41  
42  
43  
44  
45  
46  
47  
48  
49  
50  
51  
52  
53  
54  
55  
56  
57  
58  
59  
60

## Research checklist- STROBE Statement—checklist

|                           | Item No | Page number |
|---------------------------|---------|-------------|
| <b>Title and abstract</b> | 1       | 1           |
|                           |         | 3           |
| <b>Introduction</b>       |         |             |
| Background/rationale      | 2       | 6-7         |
| Objectives                | 3       | 7           |
| <b>Methods</b>            |         |             |
| Study design              | 4       | 7-9         |
| Setting                   | 5       | 7           |
| Participants              | 6       | 7-8         |
| Variables                 | 7       | 7-9         |
| Data sources/ measurement | 8*      | 7-9         |
| Bias                      | 9       | N/A         |
| Study size                | 10      | N/A         |
| Quantitative variables    | 11      | 7-9         |
| Statistical methods       | 12      | 8-9         |
| <b>Results</b>            |         |             |
| Participants              | 13*     | 9-10        |
| Descriptive data          | 14*     | 9-10        |
| Outcome data              | 15*     | 9-12        |
| Main results              | 16      | 9-12        |
| Other analyses            | 17      | N/A         |
| <b>Discussion</b>         |         |             |
| Key results               | 18      | 12          |
| Limitations               | 19      | 12-13       |
| Interpretation            | 20      | 14-18       |
| Generalisability          | 21      | 17-18       |
| <b>Other information</b>  |         |             |
| Funding                   | 22      | 25          |
