# Supplementary material for: Disparities of infant and neonatal mortality trends in Greece during the years of economic crisis by ethnicity, place of residence and human development index: a nationwide population study
Source: PubMed Central journal article supplement — BMJ Open. 2019 Aug 18;9(8):e025287. doi: 10.1136/bmjopen-2018-025287 (PMC6701607; doi:10.1136/bmjopen-2018-025287), 2019-08-18
Supplement: bmjopen-2018-025287supp001.pdf [file bmjopen-2018-025287supp001.pdf]

**Suppl. Table 1.** Infant deaths and total infant mortality rates (IMR) by place of residence (2004-2016).

| Year | Infants born to mothers living in urban/semiurban areas |                                 | Infants born to mothers living in rural areas |                                 |
|------|---------------------------------------------------------|---------------------------------|-----------------------------------------------|---------------------------------|
|      | Infant deaths (N)                                       | Mortality rates/1000 livebirths | Infant deaths (N)                             | Mortality rates/1000 livebirths |
| 2004 | 400                                                     | 4.5                             | 29                                            | 1.8                             |
| 2005 | 383                                                     | 4.2                             | 26                                            | 1.6                             |
| 2006 | 382                                                     | 4.0                             | 33                                            | 1.9                             |
| 2007 | 377                                                     | 3.9                             | 20                                            | 1.2                             |
| 2008 | 298                                                     | 2.9                             | 16                                            | 0.9                             |
| 2009 | 344                                                     | 3.4                             | 27                                            | 1.5                             |
| 2010 | 403                                                     | 4.1                             | 33                                            | 1.9                             |
| 2011 | 326                                                     | 3.5                             | 31                                            | 2.2                             |
| 2012 | 276                                                     | 3.2                             | 17                                            | 1.3                             |
| 2013 | 334                                                     | 4.2                             | 11                                            | 0.8                             |
| 2014 | 284                                                     | 3.6                             | 55                                            | 3.9                             |
| 2015 | 299                                                     | 3.8                             | 61                                            | 4.5                             |
| 2016 | 315                                                     | 4.0                             | 68                                            | 4.9                             |
